# Supplementary material for: Associations between contraception and stunting in Guatemala: secondary analysis of the 2014–2015 Demographic and Health Survey
Source: PubMed Central journal article supplement — BMJ Paediatr Open. 2019 Aug 22;3(1):e000510. doi: 10.1136/bmjpo-2019-000510 (PMC6721081; doi:10.1136/bmjpo-2019-000510), 2019-08-22
Supplement: bmjpo-2019-000510.draft_revisions.pdf [file bmjpo-2019-000510.draft_revisions.pdf]

# BMJ Paediatrics Open

BMJ Paediatrics Open is committed to open peer review. As part of this commitment we make the peer review history of every article we publish publicly available.

When an article is published we post the peer reviewers' comments and the authors' responses online. We also post the versions of the paper that were used during peer review. These are the versions that the peer review comments apply to.

The versions of the paper that follow are the versions that were submitted during the peer review process. They are not the versions of record or the final published versions. They should not be cited or distributed as the published version of this manuscript.

BMJ Paediatrics Open is an open access journal and the full, final, typeset and author-corrected version of record of the manuscript is available on our site with no access controls, subscription charges or pay-per-view fees (<http://bmjpaedsopen.bmj.com>).

If you have any questions on BMJ Paediatrics Open's open peer review process please email [info.bmjpo@bmj.com](mailto:info.bmjpo@bmj.com)

# BMJ Paediatrics Open

## Associations between maternal contraception and stunting in Guatemala: Secondary analysis of the 2014-2015 Demographic and Health Survey

|                               |                                                                                                                                                                                        |
|-------------------------------|----------------------------------------------------------------------------------------------------------------------------------------------------------------------------------------|
| Journal:                      | <i>BMJ Paediatrics Open</i>                                                                                                                                                            |
| Manuscript ID                 | bmjpo-2019-000510                                                                                                                                                                      |
| Article Type:                 | Original article                                                                                                                                                                       |
| Date Submitted by the Author: | 17-Apr-2019                                                                                                                                                                            |
| Complete List of Authors:     | Flood, David; Wuqu' Kawoq<br>Petersen, Ashley; University of Minnesota<br>Martinez, Boris; Wuqu' Kawoq,<br>Chary, Anita; Wuqu' Kawoq<br>Austad, Kirsten; Wuqu' Kawoq<br>Rohloff, Peter |
| Keywords:                     | Comm Child Health, Epidemiology, Growth, Health services research                                                                                                                      |
|                               |                                                                                                                                                                                        |

SCHOLARONE™  
Manuscripts

1  
2  
3 **Associations between maternal contraception and stunting in Guatemala: Secondary**  
4 **analysis of the 2014-2015 Demographic and Health Survey**  
5  
6  
7  
8  
9

10 David Flood,<sup>1,2</sup> Ashley Petersen,<sup>3</sup> Boris Martinez,<sup>2</sup> Anita Chary,<sup>2,4</sup> Kirsten Austad,<sup>2,5</sup> Peter  
11 Rohloff<sup>2,6</sup>  
12  
13  
14  
15  
16  
17  
18

19 <sup>1</sup> Departments of Medicine and Pediatrics, University of Minnesota, Minneapolis, MN, United  
20 States  
21  
22

23 <sup>2</sup> Wuqu' Kawoq, Santiago Sacatepéquez, Guatemala  
24  
25

26 <sup>3</sup> Division of Biostatistics, University of Minnesota, Minneapolis, MN, United States  
27

28 <sup>4</sup> Department of Emergency Medicine, Massachusetts General Hospital, Boston, MA, United  
29 States  
30  
31

32 <sup>5</sup> Division of Women's Health, Department of Medicine, Brigham and Women's Hospital,  
33 Boston, MA, United States  
34  
35

36 <sup>6</sup> Division of Global Health Equity, Brigham and Women's Hospital, Boston, MA, United States  
37  
38  
39  
40  
41

42 **Corresponding author:**  
43

44 Peter Rohloff  
45

46 Email: peter@wuqkawoq.org  
47  
48

49 Phone: +502-4958-1253  
50

51 Address: Wuqu' Kawoq  
52  
53

54 2 calle 5-43 zona 1  
55  
56  
57  
58  
59  
60

1  
2  
3 Santiago Sacatepéquez  
4

5 Guatemala 03006  
6

7  
8 Central America  
9

10  
11  
12 Abstract word count: 240  
13

14 Main body text word count: 2,494  
15

16  
17 Number of references: 40  
18

19 Number of tables: 5  
20

21 Number of figures: 0  
22  
23  
24  
25  
26  
27  
28  
29  
30  
31  
32  
33  
34  
35  
36  
37  
38  
39  
40  
41  
42  
43  
44  
45  
46  
47  
48  
49  
50  
51  
52  
53  
54  
55  
56  
57  
58  
59  
60

## ABSTRACT

**Background:** There has been limited research on the relationship between maternal contraception and child growth in low- and middle-income countries (LMICs). This study examines the association between maternal contraception and child linear growth in Guatemala, a LMIC with a very high prevalence of child stunting. We hypothesize that access to maternal contraception is associated with better child linear growth and less stunting in Guatemala.

**Methods:** Using representative national data on 12,440 children 0-59 months of age from the 2014-2015 Demographic and Health Survey in Guatemala, we constructed multivariable linear and Poisson regression models to assess whether child linear growth and stunting were associated with maternal contraceptive variables. All models were adjusted for a comprehensive set of pre-specified confounding variables.

**Results:** In the multivariable regression analyses, maternal contraceptive use and unmet need for family planning were associated with modest, statistically significant greater height-for-age z-score. Similarly, current and prior use of a modern contraceptive method were associated with a statistically significant lower prevalence ratio of stunting and severe stunting. Unmet need for family planning was associated with a statistically significant lower prevalence ratio for severe stunting but not stunting.

**Conclusions:** Direct measures of maternal contraception were generally associated with better child linear growth and less child stunting in Guatemala. In addition to the human rights

1  
2  
3 imperative to expand contraceptive access and choice, family planning merits further study as a  
4  
5 strategy to improve child growth in Guatemala and other countries with high prevalence of  
6  
7  
8 stunting.  
9  
10  
11  
12  
13  
14  
15  
16  
17  
18  
19  
20  
21  
22  
23  
24  
25  
26  
27  
28  
29  
30  
31  
32  
33  
34  
35  
36  
37  
38  
39  
40  
41  
42  
43  
44  
45  
46  
47  
48  
49  
50  
51  
52  
53  
54  
55  
56  
57  
58  
59  
60

Confidential: For Review Only

**What is known about the subject:**

- There has been limited research on the relationship between maternal contraception and child growth in low- and middle-income countries like Guatemala.
- Prior studies have shown that indirect markers of family planning utilization such as maternal age, birth intervals, and family size are often associated with improved child growth.
- However, these proxy markers of maternal contraception are detached from real-world use and need.

**What this study adds:**

- Direct measures of maternal contraception were generally associated with modestly better child linear growth and less child stunting in Guatemala.
- This is the first study to assess the relationship between unmet need for family planning and child growth in a low- and middle-income country.
- This analysis adds to the evidence that family planning may have positive spillover effects on child growth.

## INTRODUCTION

Approximately 200 million women in low- and middle-income countries (LMICs) wish to avoid pregnancy but do not use modern contraceptive methods.<sup>1</sup> Access to family planning averts maternal deaths<sup>2</sup> and is supported by rights-based frameworks.<sup>3</sup> Family planning also may have important spillover effects for child growth.<sup>4</sup>

This study examines the relationship between maternal contraception and child linear growth in Guatemala, an upper-middle income country in Central America. Guatemala has Latin America's highest prevalence of stunting,<sup>5</sup> and rural children in Guatemala are among the most stunted populations in the world.<sup>6</sup> Stunting confers significant short- and long-term health risks, and it is thus a critical child health issue in Guatemala and globally.

Understanding the relationship between maternal contraception and child growth is relevant to policymakers and program implementers in Guatemala and other similar contexts seeking to address high levels of child stunting. In the authors' own community nutrition programs in Guatemala,<sup>7</sup> we anecdotally have observed more rapid improvements in child growth in communities with higher utilization of maternal contraception. Evidence from the field of evolutionary anthropology also supports a trade-off between reproduction and offspring health.<sup>8</sup> Prior research in LMICs has demonstrated that pregnancy intention is variably associated with stunting<sup>9-15</sup> and that proxy markers of family planning utilization such as maternal age, birth intervals, and family size are associated with improved child linear growth.<sup>4 16-19</sup> However, retrospective assessments of pregnancy intention are subject to bias,<sup>20 21</sup> and indirect markers of



1  
2  
3 family planning utilization are detached from real-world contraceptive use and need. Few studies  
4  
5 of child stunting have utilized direct measures of family planning such as modern contraceptive  
6  
7 use or unmet need for family planning, which have emerged as critical metrics in the family  
8  
9  
10 planning movement.<sup>22</sup>  
11

12  
13  
14 Within this background, we hypothesize that maternal contraception is associated with better  
15  
16 child linear growth and less stunting in Guatemala.  
17  
18

## 19 20 21 **METHODS** 22

### 23 24 25 26 **Study design and sample** 27

28  
29  
30 To assess the association between maternal contraception and child growth in Guatemala, we  
31  
32 conducted a secondary analysis of survey data from the 2014-2015 Demographic and Health  
33  
34 Survey (DHS). Details on survey design can be found in the DHS report.<sup>23</sup> We used the  
35  
36 Children's Recode file, which comprises 12,440 children ages 0-59 months.  
37  
38

### 39 40 41 42 **Dependent variables** 43

44  
45  
46 The dependent variables are related to child growth. Child length/height-for-age z-score (HAZ)  
47  
48 was utilized as a continuous dependent variable, and the presence of stunting ( $HAZ \leq -2.0$ ) or  
49  
50 severe stunting ( $HAZ \leq -3.0$ ) were utilized as binary dependent variables. HAZ was based on  
51  
52 WHO reference standards.  
53  
54  
55

## Independent variables

The independent variables were selected around two core themes of (1) maternal contraceptive use and (2) maternal contraceptive need.

Variables relating to maternal contraception use included current use, prior use, and duration of current use (dichotomized to more or less than the median period of use of 15 months). We used DHS definitions of contraceptive type (modern method, traditional method, and no use) with the exception of classifying “folkloric methods” (0.1% of sample) as no use.

Variables relating to maternal contraceptive need included unmet need for family planning (hereafter “unmet need”) and pregnancy intention. Unmet need is a dichotomous variable referring to “women who are not currently using a method of contraception and want to stop or delay childbearing.”<sup>24</sup> Pregnancy intention refers to the mother’s retrospective assessment of whether the child was wanted at the time of the pregnancy.

## Confounding variables

Confounding variables were selected *a priori* for model inclusion based on a review of global stunting literature,<sup>6 25</sup> predictors of child stunting reported in previous research conducted in Guatemala,<sup>26 27</sup> and the authors’ country-specific expertise.<sup>28-30</sup>

1  
2  
3 Continuous confounding variables included age of child in months, age of mother in years, and  
4 household wealth index. Given non-linearity between HAZ and these continuous variables, for  
5 each we pre-specified restricted cubic splines with five knots.  
6  
7  
8  
9

10  
11  
12 Categorical confounding variables included child sex, area of residence (urban, rural), maternal  
13 and partner education attainment (none, incomplete primary, primary, incomplete secondary,  
14 complete secondary, and higher), maternal literacy (not literate, semi-literate, literate), maternal  
15 marital status (never in union, partnered, or formerly partnered), region of country, ethnic group  
16 by self-identification, language spoken in the home, presence of diarrhea in the last two weeks,  
17 type of sanitation (improved and unshared, improved and shared, or unimproved), type of  
18 drinking water, birth order, and number of children under age 5 in the household.  
19  
20  
21  
22  
23  
24  
25  
26  
27  
28  
29

### 30 **Statistical analysis**

31  
32  
33  
34  
35 We took into account survey weighting, clustering at the PSU level, and sampling design using  
36 Stata's *svyset* command and estimated variance using the Taylor linearization. We used Stata  
37 version 13 (College Station, TX) for all analyses and did not correct p-values for multiple  
38 testing. Eight percent of children were excluded in the bivariate and multivariate analysis due to  
39 missing data.  
40  
41  
42  
43  
44  
45  
46  
47  
48

49 First, we generated population descriptive statistics and assessed the bivariate relationships  
50 between independent and dependent variables.  
51  
52  
53  
54  
55  
56  
57  
58  
59  
60

1  
2  
3 We then constructed two sets of multivariable linear regression models to test the hypothesis that  
4 maternal contraception is associated with HAZ. The same pre-specified confounding variables  
5 were included in all models. The first set of models utilized independent variables related to  
6 maternal contraceptive use: current contraceptive use (Model 1A); adding prior contraceptive use  
7 to Model 1A (Model 1B); and adding duration of current contraceptive use to Model 1B (Model  
8 1C). The second set of models utilized independent variables relating to unmet need: unmet need  
9 (Model 2A) and adding pregnancy intention to Model 2A (Model 2B).  
10  
11  
12  
13  
14  
15  
16  
17  
18  
19  
20

21 Next, in order to test whether maternal contraception was associated with the presence of  
22 stunting and severe stunting, we specified multivariable Poisson regressions with the same  
23 independent variables as Models 1C and 2B. We chose Poisson rather than logistic regression to  
24 facilitate the interpretation of results.<sup>31</sup> The same pre-specified confounding variables were  
25 included.  
26  
27  
28  
29  
30  
31  
32  
33  
34

35 Finally, we carried out sensitivity analyses. First, we ran the models on a restricted sample of  
36 children with a birth order of 2 or greater for whom preceding birth interval data were available  
37 (n=8,434). Birth interval is a proxy for maternal contraception and has been associated with child  
38 growth in the literature.<sup>4</sup> Second, we added maternal height as a continuous variable to the  
39 models with listwise deletion of records with missing data (n=10,657). Third, we included meal  
40 frequency and dietary diversity as indicator variables and ran the models on applicable children  
41 ages 6-23 months (n=3,520).  
42  
43  
44  
45  
46  
47  
48  
49  
50  
51  
52

## 53 **Ethics**

54  
55  
56  
57  
58  
59  
60

The use of survey data for this study was approved by DHS. We followed STROBE guidelines in reporting our research.

## Patient and Public Involvement

As a secondary data set analysis, there was no patient or public involvement in the conduct of this research.

## RESULTS

### Sample characteristics and bivariate analyses

The characteristics of children included in the analyses are shown in Table 1 and bivariate relationships in Table 2.

**Table 1: Survey-weighted characteristics of children in the sample**

| Characteristic                                        | Number | Population estimate |
|-------------------------------------------------------|--------|---------------------|
| <i>Dependent variables</i>                            |        |                     |
| HAZ, mean (SD)                                        | 11,674 | -1.68 (1.14)        |
| Stunted, % (95% CI)                                   | 11,674 | 39.1 (37.4 to 40.8) |
| Severely stunted, % (95% CI)                          | 11,674 | 12.1 (11.0 to 13.4) |
| <i>Independent variables</i>                          |        |                     |
| <b>Maternal current contraceptive use, % (95% CI)</b> |        |                     |
| No use                                                |        | 44.3 (42.8 to 45.9) |
| Traditional method                                    |        | 10.9 (10.1 to 11.7) |

|                                                            |        |                              |
|------------------------------------------------------------|--------|------------------------------|
| Modern method, <15 months                                  |        | 22.9 (21.7 to 24.2)          |
| Modern method, ≥15 months                                  |        | 21.9 (20.8 to 23.1)          |
| <b>Maternal prior contraceptive use, % (95% CI)</b>        | 12,440 |                              |
| No use                                                     |        | 49.8 (48.3 to 51.4)          |
| Traditional method                                         |        | 11.4 (10.5 to 12.4)          |
| Modern method                                              |        | 38.8 (37.3 to 40.3)          |
| <b>Maternal unmet need for family planning, % (95% CI)</b> | 12,437 | 19.9 (18.8 to 21.2)          |
| <b>Pregnancy intention, % (95% CI)</b>                     | 12,437 |                              |
| Wanted then                                                |        | 64.1 (62.9 to 65.4)          |
| Wanted later                                               |        | 20.3 (19.4 to 21.3)          |
| Not wanted                                                 |        | 15.6 (14.6 to 16.6)          |
| <b>Confounding variables</b>                               |        |                              |
| <b>Child's age in months, median (IQR)</b>                 | 11,962 | 29 (14 to 44)                |
| <b>Mother age in years, mean (SD)</b>                      | 12,440 | 27.8 (6.7)                   |
| <b>Wealth index, median (IQR)</b>                          | 12,440 | -49,854 (-107,310 to 33,359) |
| <b>Male sex, % (95% CI)</b>                                | 12,440 | 51.9 (50.9 to 52.9)          |
| <b>Rural area of residence, % (95% CI)</b>                 | 12,440 | 64.2 (62.2 to 66.2)          |
| <b>Maternal education, % (95% CI)</b>                      | 12,440 |                              |
| None                                                       |        | 18.9 (17.5 to 20.3)          |
| Incomplete primary                                         |        | 35.2 (33.7 to 36.7)          |
| Primary                                                    |        | 17.3 (16.3 to 18.3)          |
| Incomplete secondary                                       |        | 17.7 (16.6 to 18.9)          |
| Complete secondary                                         |        | 7.4 (6.6 to 8.2)             |
| Higher                                                     |        | 3.6 (3.2 to 4.2)             |
| <b>Partner education, % (95% CI)</b>                       | 12,440 |                              |
| No education                                               |        | 12.5 (11.5 to 13.7)          |

|                                                  |        |                     |
|--------------------------------------------------|--------|---------------------|
| Incomplete primary                               |        | 31.0 (29.7 to 32.4) |
| Primary                                          |        | 19.6 (18.6 to 20.7) |
| Incomplete secondary                             |        | 19.3 (18.1 to 20.6) |
| Complete secondary                               |        | 8.4 (7.7 to 9.2)    |
| Higher                                           |        | 4.4 (3.9 to 5.0)    |
| No partner or unknown                            |        | 4.7 (4.2 to 5.2)    |
| <b>Maternal literacy, % (95% CI)</b>             | 12,432 |                     |
| Not literate                                     |        | 21.4 (19.8 to 23.0) |
| Semi-literate                                    |        | 12.9 (11.9 to 13.9) |
| Literate                                         |        | 65.8 (63.9 to 67.6) |
| <b>Maternal marital status, % (95% CI)</b>       | 12,440 |                     |
| Never in union                                   |        | 4.5 (4.0 to 5.0)    |
| Current partner                                  |        | 87.5 (86.7 to 88.3) |
| Former partner                                   |        | 8.0 (7.4 to 8.7)    |
| <b>Region of country, % (95% CI)</b>             | 12,440 |                     |
| Metropolitan Guatemala City                      |        | 15.4 (13.8 to 17.2) |
| North                                            |        | 11.3 (10.0 to 12.8) |
| Northeast                                        |        | 9.1 (8.0 to 10.4)   |
| Southeast                                        |        | 8.9 (8.0 to 9.9)    |
| Central                                          |        | 10.7 (9.7 to 11.9)  |
| Southwest                                        |        | 23.6 (22.2 to 25.1) |
| Northwest                                        |        | 16.9 (15.3 to 18.6) |
| Petén                                            |        | 4.0 (3.3 to 4.9)    |
| <b>Indigenous ethnicity, % (95% CI)</b>          | 12,436 | 51.9 (49.4 to 54.4) |
| <b>Mayan language spoken in home, % (95% CI)</b> | 12,440 | 30.5 (27.9 to 33.2) |
| <b>Diarrhea last 2 weeks, % (95% CI)</b>         | 12,038 | 19.2 (18.3 to 20.3) |
| <b>Sanitation, % (95% CI)</b>                    | 12,250 |                     |

|                                            |        |                     |
|--------------------------------------------|--------|---------------------|
| Improved and unshared                      |        | 74.2 (72.6 to 75.8) |
| Improved and shared                        |        | 16.9 (15.7 to 18.1) |
| Unimproved                                 |        | 8.9 (7.7 to 10.3)   |
| <b>Improved drinking water, % (95% CI)</b> | 12,257 | 62.1 (60.0 to 64.5) |
| <b>Birth order number, median (IQR)</b>    | 12,440 | 2 (1 to 4)          |
| <b>Children in household, median (IQR)</b> | 12,440 | 1 (1 to 2)          |

CI, confidence interval; HAZ, height-for-age z-score; IQR, interquartile range; SD, standard deviation. Estimates account for sampling design. Of note, estimates differ slightly from the DHS report, which uses the Household Member Recode in its calculations.

**Table 2: Bivariate relationships between dependent and independent variables**

|                                           | <b>HAZ, mean (95% CI)</b> | <b>Stunted, % (95% CI)</b> | <b>Severely stunted, % (95% CI)</b> |
|-------------------------------------------|---------------------------|----------------------------|-------------------------------------|
| <b>Maternal current contraceptive use</b> |                           |                            |                                     |
| No use                                    | -1.86 (-1.92 to -1.80)    | 45.1 (42.8 to 47.6)        | 16.3 (14.5 to 18.2)                 |
| Traditional method                        | -1.72 (-1.81 to -1.63)    | 40.5 (36.8 to 44.4)        | 12.1 (9.8 to 15.0)                  |
| Modern method, <15 months                 | -1.53 (-1.60 to -1.47)    | 33.4 (30.6 to 36.3)        | 9.1 (7.6 to 10.8)                   |
| Modern method, ≥15 months                 | -1.47 (-1.53 to -1.41)    | 32.5 (30.2 to 34.8)        | 7.2 (6.0 to 8.5)                    |
| <b>Maternal prior contraceptive use</b>   |                           |                            |                                     |
| No use                                    | -1.83 (-1.89 to -1.78)    | 44.5 (42.3 to 46.7)        | 15.4 (13.8 to 17.2)                 |
| Traditional method                        | -1.65 (-1.74 to -1.56)    | 36.7 (33.2 to 40.3)        | 9.9 (7.9 to 12.3)                   |
| Modern method                             | -1.50 (-1.55 to -1.45)    | 32.9 (30.8 to 35.0)        | 8.5 (7.3 to 9.8)                    |
| <b>Maternal unmet need</b>                |                           |                            |                                     |
| Unmet need                                | -1.62 (-1.66 to -1.58)    | 47.7 (44.6 to 50.7)        | 17.6 (15.2 to 20.2)                 |
| No unmet need                             | -1.93 (-2.01 to -1.85)    | 36.9 (35.2 to 38.7)        | 10.8 (9.7 to 11.9)                  |
| <b>Pregnancy intention</b>                |                           |                            |                                     |



|              |                        |                     |                     |
|--------------|------------------------|---------------------|---------------------|
| Wanted then  | -1.66 (-1.71 to -1.61) | 38.5 (36.5 to 40.4) | 11.7 (10.5 to 13.1) |
| Wanted later | -1.68 (-1.74 to -1.62) | 38.5 (36.1 to 41.1) | 11.7 (10.2 to 13.5) |
| Not wanted   | -1.78 (-1.86 to -1.70) | 42.3 (39.2 to 45.4) | 14.1 (11.8 to 16.8) |

HAZ, height-for-age z-score; CI, confidence interval. Estimates account for sampling design.

### Multivariable regression with dependent variable of HAZ

Table 3 shows the results of the multivariable linear regression Models 1A-1C focusing on maternal contraceptive use. Current and prior use of maternal contraception were statistically significant (overall p-value <0.001 for these categorical variables in all models). When duration of current modern use was included (Model 1C), use for  $\geq 15$  months was associated with a 0.19 (95% CI 0.12 to 0.25,  $p < 0.001$ ) increase in HAZ but modern use for <15 months was not statistically significant.

In the multivariable linear regression models focusing on maternal contraceptive need, unmet need was associated with a -0.07 (-0.13 to -0.01,  $p = 0.02$ ) change in HAZ (Model 2A). When pregnancy intention was included (Model 2B), unmet need similarly was associated with a -0.07 (-0.13 to -0.01,  $p = 0.03$ ) change in HAZ while pregnancy intention was not significant (overall  $p = 0.08$  for this categorical variable).

**Table 3: Coefficient estimates and 95% CI from linear regression models relating to maternal contraceptive use and HAZ (n=11,501)**

|  | Model 1A | Model 1B | Model 1C |
|--|----------|----------|----------|
|--|----------|----------|----------|

|                                  |                           |                           |                           |
|----------------------------------|---------------------------|---------------------------|---------------------------|
| <b>Current contraceptive use</b> | ***                       | ***                       | ***                       |
| No use                           | (Reference)               | (Reference)               | (Reference)               |
| Traditional                      | 0.11**<br>(0.03 to 0.18)  | 0.09*<br>(0.02 to 0.17)   | 0.10**<br>(0.03 to 0.18)  |
| Modern, any duration             | 0.10***<br>(0.05 to 0.16) | 0.10***<br>(0.05 to 0.16) | N/A                       |
| Modern, <15 months               | N/A                       | N/A                       | 0.03<br>(-0.03 to 0.10)   |
| Modern, ≥15 months               | N/A                       | N/A                       | 0.19***<br>(0.12 to 0.25) |
| <b>Prior contraceptive use</b>   |                           | ***                       | ***                       |
| No use                           |                           | (Reference)               | (Reference)               |
| Traditional                      |                           | 0.11**<br>(0.04 to 0.19)  | 0.12**<br>(0.05 to 0.20)  |
| Modern                           |                           | 0.11***<br>(0.05 to 0.16) | 0.12***<br>(0.07 to 0.18) |

CI, confidence interval; N/A, not applicable. \*  $p < 0.05$ , \*\*  $p < 0.01$ , \*\*\*  $p < 0.001$ . Asterisks not associated with estimates reflect the overall p-value of the variable. The same pre-specified confounding variables were included in all models: age of child, age of mother, wealth index, child sex, area of residence, maternal and partner education attainment, maternal literacy, maternal marital status, region of country, ethnic group, language, presence of diarrhea in the last two weeks, type of sanitation, type of drinking water, birth order, and number of children under age 5 in the household. Estimates account for sampling design.

### **Multivariable regression with dependent variable of stunting and severe stunting**

Table 4 shows the results of the multivariable Poisson regression models assessing stunting and severe stunting against maternal contraceptive use. The independent variables of current and prior use of maternal contraception both were statistically significant for the outcomes of stunting and severe stunting (overall p-value  $< 0.05$ ). Compared with no contraceptive use,

current use of a modern contraceptive method for  $\geq 15$  months was associated with a prevalence ratio of stunting of 0.90 (95% CI 0.84 to 0.97,  $p=0.005$ ) and severe stunting of 0.65 (95% CI 0.54 to 0.78,  $p<0.001$ ). Prior use of either traditional or modern contraceptive types was associated with statistically significantly lower prevalence of stunting and severe stunting.

**Table 4: Prevalence ratios of stunting and severe stunting estimated from multivariable Poisson regression models using maternal contraceptive use**

|                                           | <b>Prevalence ratio of stunting (95% CI)</b> | <b>Prevalence ratio of severe stunting (95% CI)</b> |
|-------------------------------------------|----------------------------------------------|-----------------------------------------------------|
| <b>Maternal current contraceptive use</b> | *                                            | ***                                                 |
| No use                                    | (Reference)                                  | (Reference)                                         |
| Traditional method                        | 0.96<br>(0.88 to 1.04)                       | 0.85<br>(0.69 to 1.04)                              |
| Modern method, <15 months                 | 1.00<br>(0.92 to 1.08)                       | 0.91<br>(0.77 to 1.06)                              |
| Modern method, $\geq 15$ months           | 0.90**<br>(0.84 to 0.97)                     | 0.65***<br>(0.54 to 0.78)                           |
| <b>Maternal prior contraceptive use</b>   | **                                           | ***                                                 |
| No use                                    | (Reference)                                  | (Reference)                                         |
| Traditional method                        | 0.88**<br>(0.80 to 0.96)                     | 0.73**<br>(0.60 to 0.88)                            |
| Modern method                             | 0.92*<br>(0.87 to 0.98)                      | 0.81**<br>(0.70 to 0.93)                            |

CI, confidence interval. \*  $p<0.05$ , \*\*  $p<0.01$ , \*\*\*  $p<0.001$ . Asterisks not associated with estimates reflect the overall p-value of the variable. The same pre-specified confounding variables were included in all models: age of child, age of mother, wealth index, child sex, area of residence, maternal and partner education attainment, maternal literacy, maternal marital status, region of country, ethnic group, language, presence of diarrhea in the last two weeks, type

of sanitation, type of drinking water, birth order, and number of children under age 5 in the household. Estimates account for sampling design.

Table 5 shows the results of the multivariable Poisson regression models assessing stunting and severe stunting against maternal contraceptive need. In these models, the only association reaching statistical significance was that unmet need was associated with a severe stunting prevalence ratio of 1.14 (1.01 to 1.30,  $p=0.04$ ).

**Table 5: Prevalence ratios of stunting and severe stunting estimated from multivariable Poisson regression models using maternal contraceptive need**

|                            | <b>Prevalence ratio of stunting (95% CI)</b> | <b>Prevalence ratio of severe stunting (95% CI)</b> |
|----------------------------|----------------------------------------------|-----------------------------------------------------|
| <b>Maternal unmet need</b> |                                              |                                                     |
| Unmet need                 | 1.04<br>(0.97 to 1.10)                       | 1.14*<br>(1.01 to 1.30)                             |
| No unmet need              | (Reference)                                  | (Reference)                                         |
| <b>Pregnancy intention</b> |                                              |                                                     |
| Wanted then                | (Reference)                                  | (Reference)                                         |
| Wanted later               | 1.05<br>(0.99 to 1.12)                       | 1.11<br>(0.97 to 1.27)                              |
| Not wanted                 | 0.99<br>(0.92 to 1.06)                       | 1.02<br>(0.87 to 1.19)                              |

CI, confidence interval. \*  $p<0.05$ , \*\*  $p<0.01$ , \*\*\*  $p<0.001$ . The overall  $p$ -value for the variable pregnancy intention was not significant in either model. The same pre-specified confounding variables were included in all models: age of child, age of mother, wealth index, child sex, area of residence, maternal and partner education attainment, maternal literacy, maternal marital status, region of country, ethnic group, language, presence of diarrhea in the last two weeks, type of sanitation, type of drinking water, birth order, and number of children under age 5 in the household. Estimates account for sampling design.

### Sensitivity analyses

1  
2  
3  
4  
5 Inclusion of antecedent birth intervals to the models yielded results that were generally  
6  
7 consistent with the findings of the primary models. The results of the sensitivity analyses with  
8  
9 maternal height and dietary covariates were also similar to the main analysis.  
10  
11

## 12 **DISCUSSION**

13  
14  
15  
16

17 This study was a secondary analysis of maternal contraception and child growth using 2014-  
18  
19 2015 Guatemala DHS data. In the multivariable linear regression models, maternal contraceptive  
20  
21 use and need were associated with statistically significant changes in child linear growth as  
22  
23 measured by HAZ. In the multivariable Poisson regression models, maternal contraceptive use  
24  
25 was associated with statistically significant lower prevalence of stunting and severe stunting; for  
26  
27 unmet need, the relationship was significantly higher for severe stunting but not stunting.  
28  
29  
30  
31  
32

33 While the magnitude of the associations reported in this study is modest, these results should be  
34  
35 viewed in the context of other strategies to improve child growth. A meta-analysis of evidence-  
36  
37 based interventions for child nutrition reported the effect size of nutrition education in food-  
38  
39 insecure populations of 0.25 HAZ and complementary food provision of 0.39 HAZ.<sup>32</sup> Trials of  
40  
41 water, sanitation, and hygiene (WASH) interventions have not consistently found benefit.<sup>33</sup> A  
42  
43 review of context-specific nutrition programs found a median reduction in child stunting of 3%  
44  
45 per year<sup>34</sup>. These sobering figures reiterate that stunting arises from a complex political,  
46  
47 economic, and social context that can only be partially attenuated via technical intervention.<sup>25</sup>  
48  
49  
50  
51  
52  
53  
54  
55  
56  
57  
58  
59  
60

1  
2  
3 This research is, to our knowledge, the first to specifically investigate the association of unmet  
4 need on child linear growth, and it is one of the few studies assessing maternal modern  
5 contraception use on child growth. As discussed in the introduction, other researchers have  
6 explored the relationship between family planning and child growth principally by focusing on  
7 pregnancy intention or proxy metrics of contraception like birth intervals, maternal age, and  
8 family size. Such measures have generally been found to be associated with child growth, often  
9 using underlying DHS data.<sup>4 16-19</sup> The association with pregnancy intention has been less  
10 consistent in cross-sectional studies,<sup>9-15</sup> perhaps owing to challenges in retrospectively  
11 determining pregnancy intent.<sup>20</sup> Interestingly, unintended and/or mistimed pregnancies  
12 previously have been associated with poorer child growth in Bolivia and Peru, two Latin  
13 American countries with large indigenous populations demographically similar to Guatemala.<sup>9 10</sup>

14  
15  
16  
17  
18  
19  
20  
21  
22  
23  
24  
25  
26  
27  
28  
29  
30  
31 Several findings that emerged from this work merit additional comment. First, an unexpected  
32 result was that use of traditional methods was generally associated with similar changes in child  
33 growth and stunting compared to use of modern methods. We caution that our study was not  
34 intended to test the ordering of contraceptive types on child growth, does not address  
35 contraceptive efficacy, and is subject to the definitional and methodological issues described  
36 below. For example, self-reporting of traditional contraceptive use might reflect residual  
37 confounders such as maternal autonomy, which was not incorporated in this analysis but has  
38 been associated with stunting in other settings.<sup>35</sup> Second, the association between maternal  
39 contraception and child growth persisted even in the sensitivity analysis that controlled for  
40 antecedent birth intervals. This finding suggests that the association of contraception on  
41 improved child growth may not be solely mediated through birth spacing and family size; other  
42  
43  
44  
45  
46  
47  
48  
49  
50  
51  
52  
53  
54  
55  
56  
57  
58  
59  
60

1  
2  
3 mechanisms are speculative but might include comparatively increased household resources  
4 directed to children of mothers with access to contraception. Third, the relationship between  
5 current modern contraceptive use and HAZ seemed to be “dose-dependent,” as current use of  
6 modern methods for 15 or more months was associated with statistically significant  
7 improvements in child HAZ and stunting, while users of less than 15 months had no significant  
8 difference in child growth compared to those not using contraception.  
9  
10  
11  
12  
13  
14  
15  
16  
17  
18

19 One important methodological consideration in this study is definitional. We used DHS-aligned  
20 definitions of contraceptive type (modern or traditional) and unmet demand in all analyses.<sup>24</sup>  
21 However, the distinction between modern versus traditional methods has been debated.<sup>36</sup> For  
22 example, DHS defines women who use a traditional method to have no unmet need for family  
23 planning,<sup>24</sup> but other researchers classify traditional users as having an unmet need for modern  
24 methods.<sup>1</sup> We justify the definitions utilized in this study as appropriate given that it is the  
25 classification scheme currently recommended by DHS.  
26  
27  
28  
29  
30  
31  
32  
33  
34  
35  
36  
37

38 The strengths of this study include use of a recently released, representative DHS survey that  
39 permitted current population-level estimates of change in HAZ and stunting in Guatemala.  
40 Additionally, our prior ethnographic and programmatic experience in Guatemala assisted in  
41 selection of a comprehensive set of covariates tailored to the setting. In response to critiques of  
42 DHS studies arising from the economics literature, we also carefully specified non-linear  
43 relationships between continuous covariates and HAZ.<sup>37</sup> A final study strength is that we  
44 conducted thorough sensitivity analyses, which were generally consistent with the main analysis.  
45  
46  
47  
48  
49  
50  
51  
52  
53  
54  
55  
56  
57  
58  
59  
60

1  
2  
3 This research has some limitations and weaknesses. First, this study used data from a single  
4 survey in Guatemala, which limits generalizability to other countries. At the same time, an  
5 advantage of using single-country data is that it allowed us to carefully select confounders of  
6 interest based on stunting risk factors in a single context. Second, use of secondary survey data  
7 does not permit us to infer causality and raises the possibility of residual confounding. Potential  
8 examples include dimensions of wealth not captured in asset-based indices,<sup>38</sup> maternal  
9 autonomy,<sup>35</sup> or paternal anthropometry.<sup>39</sup> Third, we are unsure of the accuracy of self-reported  
10 contraceptive data in large surveys in Guatemala. In our own ethnographic and programmatic  
11 experience, family planning can be a delicate topic in Guatemalan households.  
12  
13  
14  
15  
16  
17  
18  
19  
20  
21  
22  
23  
24  
25

26 Our study suggests multiple directions for future research on the relationship between maternal  
27 contraception and child growth. Multi-country studies would be useful to further evaluate the  
28 association between unmet need and child growth. Aggregating data across countries would also  
29 facilitate analysis of the association between child growth and maternal use of long-acting  
30 reversible contraceptives, which are increasingly emphasized in the global reproductive health  
31 literature. Structural equation modeling could help characterize the pathways and mediators  
32 between family planning and stunting. Given the difficulty in designing an ethically rigorous  
33 randomized trial examining the impact of a maternal contraception intervention on child growth,  
34 alternative methodological and statistical approaches to infer causality may be helpful. Such  
35 strategies could also help better understand the dynamic process of contraceptive discontinuation  
36 and its impact on child growth.<sup>40</sup>  
37  
38  
39  
40  
41  
42  
43  
44  
45  
46  
47  
48  
49  
50  
51  
52  
53  
54  
55  
56  
57  
58  
59  
60



1  
2  
3 In conclusion, using secondary survey data in Guatemala, this study found an association  
4  
5 between direct measures of maternal contraception and better child growth outcomes that was  
6  
7 modest in magnitude yet significant from a public health perspective. In addition to the human  
8  
9 rights imperative to expand contraceptive access and choice, family planning merits further  
10  
11 research and policy consideration as a strategy to improve child growth in Guatemala and similar  
12  
13 countries with high prevalence of stunting.  
14  
15  
16  
17  
18  
19  
20  
21  
22  
23  
24  
25  
26  
27  
28  
29  
30  
31  
32  
33  
34  
35  
36  
37  
38  
39  
40  
41  
42  
43  
44  
45  
46  
47  
48  
49  
50  
51  
52  
53  
54  
55  
56  
57  
58  
59  
60

## REFERENCES

1. Darroch JE, Singh S. Trends in contraceptive need and use in developing countries in 2003, 2008, and 2012: an analysis of national surveys. *Lancet* 2013;381(9879):1756-62.
2. Ahmed S, Li Q, Liu L, et al. Maternal deaths averted by contraceptive use: an analysis of 172 countries. *Lancet* 2012;380(9837):111-25.
3. Starrs AM, Ezeh AC, Barker G, et al. Accelerate progress-sexual and reproductive health and rights for all: report of the Guttmacher-Lancet Commission. *Lancet* 2018
4. Fink G, Sudfeld CR, Danaei G, et al. Scaling-up access to family planning may improve linear growth and child development in low and middle income countries. *PLoS One* 2014;9(7):e102391.
5. Corvalan C, Garmendia ML, Jones-Smith J, et al. Nutrition status of children in Latin America. *Obes Rev* 2017;18 Suppl 2:7-18.
6. Black RE, Victora CG, Walker SP, et al. Maternal and child undernutrition and overweight in low-income and middle-income countries. *Lancet* 2013;382(9890):427-51.
7. Martinez B, Flood D, Knop K, et al. Improving infant and young child nutrition in a highly stunted rural community: A practical case study from Guatemala. In: Preedy VR, Patel VB, eds. *Famine, starvation and nutrient deprivation: from cells to policy*. Cham, Switzerland: Springer International Publishing, 2017.
8. Lawson DW, Uggla C. Family Structure and Health in the Developing World: What Can Evolutionary Anthropology Contribute to Population Health Science? In: Gibson MA, Lawson DW, eds. *Applied Evolutionary Anthropology: Darwinian Approaches to Contemporary World Issues*. New York, NY: Springer New York, 2014:85-118.

- 1  
2  
3 9. Shapiro-Mendoza C, Selwyn BJ, Smith DP, et al. Parental pregnancy intention and early  
4 childhood stunting: findings from Bolivia. *Int J Epidemiol* 2005;34(2):387-96.  
5  
6
- 7  
8 10. Marston C, Cleland J. Do unintended pregnancies carried to term lead to adverse  
9 outcomes for mother and child? An assessment in five developing countries. *Popul Stud*  
10  
11  
12  
13  
14  
15 11. Rahman MM. Is Unwanted Birth Associated with Child Malnutrition in Bangladesh? *Int*  
16  
17  
18  
19  
20 12. Baschieri A, Machiyama K, Floyd S, et al. Unintended Childbearing and Child Growth in  
21 Northern Malawi. *Matern Child Health J* 2017;21(3):467-74.  
22  
23
- 24 13. Upadhyay AK, Srivastava S. Effect of pregnancy intention, postnatal depressive  
25 symptoms and social support on early childhood stunting: findings from India. *BMC*  
26  
27  
28  
29  
30  
31 14. Montgomery M, Lloyd C, Hewett P, et al. *The Consequences of Imperfect Fertility*  
32  
33  
34  
35  
36  
37  
38 15. Singh A, Chalasani S, Koenig MA, et al. The consequences of unintended births for  
39 maternal and child health in India. *Popul Stud (Camb)* 2012;66(3):223-39.  
40  
41  
42  
43 16. Finlay JE, Ozaltin E, Canning D. The association of maternal age with infant mortality,  
44 child anthropometric failure, diarrhoea and anaemia for first births: evidence from 55  
45 low- and middle-income countries. *BMJ Open* 2011;1(2):e000226.  
46  
47  
48  
49 17. Ikeda N, Irie Y, Shibuya K. Determinants of reduced child stunting in Cambodia:  
50 analysis of pooled data from three demographic and health surveys. *Bull World Health*  
51  
52  
53  
54  
55  
56  
57  
58  
59  
60

- 1  
2  
3 18. Naik R, Smith R. *Impacts of Family Planning on Nutrition*. Washington, D.C.: Futures  
4 Group, Health Policy Project, 2015.  
5  
6
- 7  
8 19. Rutstein S, Winter R. *The Effects of Fertility Behavior on Child Survival and Child*  
9  
10 *Nutritional Status: Evidence from the Demographic and Health Surveys, 2006 to 2012*.  
11  
12 Rockville, Maryland, USA: ICF International, 2014.  
13
- 14  
15 20. Gipson JD, Koenig MA, Hindin MJ. The effects of unintended pregnancy on infant,  
16  
17 child, and parental health: a review of the literature. *Stud Fam Plann* 2008;39(1):18-38.  
18
- 19  
20 21. Chalasani S, Casterline JB, Koenig MA. Consequences of unwanted childbearing: A  
21  
22 study of child outcomes in Bangladesh. Annual Meeting of the Population Association of  
23  
24 America, 29-31 March 2007. New York, 2007.  
25
- 26  
27 22. Cahill N, Sonneveldt E, Stover J, et al. Modern contraceptive use, unmet need, and  
28  
29 demand satisfied among women of reproductive age who are married or in a union in the  
30  
31 focus countries of the Family Planning 2020 initiative: a systematic analysis using the  
32  
33 Family Planning Estimation Tool. *Lancet* 2018;391(10123):870-82.  
34
- 35  
36 23. Ministerio de Salud Pública y Asistencia Social, Instituto Nacional de Estadística, ICF  
37  
38 International. *VI Encuesta Nacional de Salud Materno Infantil (ENSMI) 2014-2015:*  
39  
40 *Informe Final*. Guatemala: MSPAS, INE, ICF, 2017.  
41
- 42  
43 24. Bradley SE, Croft TN, Fishel JD, et al. *Revising unmet need for family planning*.  
44  
45 Calverton, Maryland, USA: ICF International, 2012.  
46
- 47  
48 25. Stewart CP, Iannotti L, Dewey KG, et al. Contextualising complementary feeding in a  
49  
50 broader framework for stunting prevention. *Matern Child Nutr* 2013;9 Suppl 2:27-45.  
51  
52  
53  
54  
55  
56  
57  
58  
59  
60

- 1  
2  
3 26. Lee J, Houser RF, Must A, et al. Disentangling nutritional factors and household  
4 characteristics related to child stunting and maternal overweight in Guatemala. *Econ Hum*  
5 *Biol* 2010;8(2):188-96.  
6  
7  
8  
9  
10 27. Sereebutra P, Solomons N, Aliyu MH, et al. Sociodemographic and environmental  
11 predictors of childhood stunting in rural Guatemala. *Nutrition Research* 2006;26(2):65-  
12 70.  
13  
14  
15  
16  
17 28. Chary A, Rohloff P, editors. *Privatization and the New Medical Pluralism: Shifting*  
18 *Healthcare Landscapes in Maya Guatemala*. Lanham, Maryland: Lexington Press, 2015.  
19  
20  
21 29. Chary A, Messmer S, Sorenson E, et al. The Normalization of Childhood Disease: An  
22 Ethnographic Study of Child Malnutrition in Rural Guatemala. *Human Organization*  
23 2013;72(2):87-97.  
24  
25  
26  
27  
28 30. Brown K, Henretty N, Chary A, et al. Mixed-methods study identifies key strategies for  
29 improving infant and young child feeding practices in a highly stunted rural indigenous  
30 population in Guatemala. *Matern Child Nutr* 2016;12(2):262-77.  
31  
32  
33  
34  
35 31. Barros AJ, Hiraakata VN. Alternatives for logistic regression in cross-sectional studies: an  
36 empirical comparison of models that directly estimate the prevalence ratio. *BMC Med*  
37 *Res Methodol* 2003;3:21.  
38  
39  
40  
41  
42 32. Bhutta ZA, Das JK, Rizvi A, et al. Evidence-based interventions for improvement of  
43 maternal and child nutrition: what can be done and at what cost? *Lancet*  
44 2013;382(9890):452-77.  
45  
46  
47  
48  
49 33. Cumming O, Cairncross S. Can water, sanitation and hygiene help eliminate stunting?  
50 Current evidence and policy implications. *Matern Child Nutr* 2016;12 Suppl 1:91-105.  
51  
52  
53  
54  
55  
56  
57  
58  
59  
60

- 1  
2  
3 34. Hossain M, Choudhury N, Adib Binte Abdullah K, et al. Evidence-based approaches to  
4 childhood stunting in low and middle income countries: a systematic review. *Arch Dis*  
5  
6 *Child* 2017;102(10):903-09.  
7  
8  
9  
10 35. Shroff M, Griffiths P, Adair L, et al. Maternal autonomy is inversely related to child  
11 stunting in Andhra Pradesh, India. *Matern Child Nutr* 2009;5(1):64-74.  
12  
13  
14 36. Austad K, Chary A, Colom A, et al. Fertility Awareness Methods Are Not Modern  
15 Contraceptives: Defining Contraception to Reflect Our Priorities. *Glob Health Sci Pract*  
16  
17 2016;4(2):342-5.  
18  
19  
20 37. Cummins JR. On the Use and Misuse of Child Height-for-Age z-score in the  
21 Demographic and Health Surveys: Working Paper 201417. Riverside, CA: University of  
22 California at Riverside, Department of Economics, 2014.  
23  
24  
25  
26  
27 38. Hruschka DJ, Hadley C, Hackman J. Material wealth in 3D: Mapping multiple paths to  
28 prosperity in low- and middle- income countries. *PLoS One* 2017;12(9):e0184616.  
29  
30  
31 39. Addo OY, Stein AD, Fall CH, et al. Parental childhood growth and offspring birthweight:  
32 pooled analyses from four birth cohorts in low and middle income countries. *Am J Hum*  
33 *Biol* 2015;27(1):99-105.  
34  
35  
36  
37 40. Barden-O'Fallon JL, Speizer IS, White JS. Association between contraceptive  
38 discontinuation and pregnancy intentions in Guatemala. *Rev Panam Salud Publica*  
39  
40 2008;23(6):410-7.  
41  
42  
43  
44  
45  
46  
47  
48  
49  
50  
51  
52  
53  
54  
55  
56  
57  
58  
59  
60

1  
2  
3 **Acknowledgments:** The authors thank colleagues and program beneficiaries at Wuqu' Kawoq in  
4  
5 Guatemala.  
6  
7  
8  
9

10 **Sources of funding:** This research was supported by the National Institutes of Health's National  
11  
12 Center for Advancing Translational Sciences, grant UL1TR002494. The content is solely the  
13  
14 responsibility of the authors and does not necessarily represent the official views of the National  
15  
16 Institutes of Health's National Center for Advancing Translational Sciences.  
17  
18  
19  
20

21 **Conflict of interest statement:** The authors declare no conflicts of interest.  
22  
23  
24  
25

26 **Contributor statements:** DF conceptualized the study, conducted the statistical analysis, wrote  
27  
28 the initial manuscript draft, and revised the manuscript. AP conducted the statistical analysis and  
29  
30 revised the manuscript. BM, AC, and KA assisted in the interpretation of the statistical models,  
31  
32 and revised the manuscript. PR conceptualized the study, assisted in designing and interpreting  
33  
34 the statistical models, and revised the manuscript All authors reviewed and approved the final  
35  
36 manuscript.  
37  
38  
39  
40  
41  
42  
43  
44  
45  
46  
47  
48  
49  
50  
51  
52  
53  
54  
55  
56  
57  
58  
59  
60

## STROBE Statement—checklist of items that should be included in reports of observational studies

|                           | Item No. | Recommendation                                                                                                                                  | Page No. | Relevant text from manuscript                                                                                                                                                                                                                                              |
|---------------------------|----------|-------------------------------------------------------------------------------------------------------------------------------------------------|----------|----------------------------------------------------------------------------------------------------------------------------------------------------------------------------------------------------------------------------------------------------------------------------|
| <b>Title and abstract</b> | 1        | (a) Indicate the study's design with a commonly used term in the title or the abstract                                                          | 1        | See title                                                                                                                                                                                                                                                                  |
|                           |          | (b) Provide in the abstract an informative and balanced summary of what was done and what was found                                             | 3-4      | See abstract text                                                                                                                                                                                                                                                          |
| <b>Introduction</b>       |          |                                                                                                                                                 |          |                                                                                                                                                                                                                                                                            |
| Background/rationale      | 2        | Explain the scientific background and rationale for the investigation being reported                                                            | 6-7      | The introductory text describes the scientific background and builds the study rationale                                                                                                                                                                                   |
| Objectives                | 3        | State specific objectives, including any prespecified hypotheses                                                                                | Page 7   | "Within this background, we hypothesize that maternal contraception is associated with better child linear growth and less stunting in Guatemala."                                                                                                                         |
| <b>Methods</b>            |          |                                                                                                                                                 |          |                                                                                                                                                                                                                                                                            |
| Study design              | 4        | Present key elements of study design early in the paper                                                                                         | Page 7   | See text under "Study design and sample"                                                                                                                                                                                                                                   |
| Setting                   | 5        | Describe the setting, locations, and relevant dates, including periods of recruitment, exposure, follow-up, and data collection                 | Page 7   | See text under "Study design and sample"                                                                                                                                                                                                                                   |
| Participants              | 6        | (a) <i>Cohort study</i> —Give the eligibility criteria, and the sources and methods of selection of participants. Describe methods of follow-up | Page 7   | "...we conducted a secondary analysis of survey data from the 2014-2015 Demographic and Health Survey (DHS). Details on survey design can be found in the DHS report. <sup>23</sup> We used the Children's Recode file, which comprises 12,440 children ages 0-59 months." |
|                           |          | (b) <i>Cohort study</i> —For matched studies, give matching criteria and number of exposed and                                                  |          |                                                                                                                                                                                                                                                                            |



1  
2  
3  
4  
5  
6  
7  
8  
9  
10  
11  
12  
13  
14  
15  
16  
17  
18  
19  
20  
21  
22  
23  
24  
25  
26  
27  
28  
29  
30  
31  
32  
33  
34  
35  
36  
37  
38  
39  
40  
41  
42  
43  
44  
45  
46

|                           |    |                                                                                                                                                                                      |     |                                                                                                                                                            |
|---------------------------|----|--------------------------------------------------------------------------------------------------------------------------------------------------------------------------------------|-----|------------------------------------------------------------------------------------------------------------------------------------------------------------|
|                           |    | unexposed<br><i>Case-control study</i> —For matched studies, give matching criteria and the number of controls per case                                                              |     |                                                                                                                                                            |
| Variables                 | 7  | Clearly define all outcomes, exposures, predictors, potential confounders, and effect modifiers. Give diagnostic criteria, if applicable                                             | 7-9 | In the text on these pages, we extensively define and discuss all variables.                                                                               |
| Data sources/ measurement | 8* | For each variable of interest, give sources of data and details of methods of assessment (measurement). Describe comparability of assessment methods if there is more than one group | 7   | This study is a secondary analysis of DHS data, so we cite the DHS report which has further details on survey collection and data processing               |
| Bias                      | 9  | Describe any efforts to address potential sources of bias                                                                                                                            | 8-9 | We imply that we protected against bias by using pre-specified confounding variables, and we state that we do not correct for multiple hypothesis testing. |
| Study size                | 10 | Explain how the study size was arrived at                                                                                                                                            | 7   | We state we that we use the nationally representative sample of children available in the original DHS survey.                                             |

Continued on next page

|                        |     |                                                                                                                                                                                                                                                                                                           |       |                                                                                                                                                                                                   |
|------------------------|-----|-----------------------------------------------------------------------------------------------------------------------------------------------------------------------------------------------------------------------------------------------------------------------------------------------------------|-------|---------------------------------------------------------------------------------------------------------------------------------------------------------------------------------------------------|
| Quantitative variables | 11  | Explain how quantitative variables were handled in the analyses. If applicable, describe which groupings were chosen and why                                                                                                                                                                              | 8-10  | We extensively discuss our quantitative dependent variable (HAZ) and confounding variables.                                                                                                       |
| Statistical methods    | 12  | (a) Describe all statistical methods, including those used to control for confounding                                                                                                                                                                                                                     | 9-10  | See text under “statistical analysis”                                                                                                                                                             |
|                        |     | (b) Describe any methods used to examine subgroups and interactions                                                                                                                                                                                                                                       | N/A   | Subgroup analysis was not performed                                                                                                                                                               |
|                        |     | (c) Explain how missing data were addressed                                                                                                                                                                                                                                                               | 9     | Eight percent of children were excluded due to missing data when fitting these models.                                                                                                            |
|                        |     | (d) <i>Cohort study</i> —If applicable, explain how loss to follow-up was addressed<br><i>Case-control study</i> —If applicable, explain how matching of cases and controls was addressed<br><i>Cross-sectional study</i> —If applicable, describe analytical methods taking account of sampling strategy | 10    | See extensive discussion of sensitivity analyses                                                                                                                                                  |
|                        |     | (e) Describe any sensitivity analyses                                                                                                                                                                                                                                                                     |       |                                                                                                                                                                                                   |
| <b>Results</b>         |     |                                                                                                                                                                                                                                                                                                           |       |                                                                                                                                                                                                   |
| Participants           | 13* | (a) Report numbers of individuals at each stage of study—eg numbers potentially eligible, examined for eligibility, confirmed eligible, included in the study, completing follow-up, and analysed                                                                                                         | 11-13 | In the Results section beginning on page 11, we specify the number of records available for each variable. We also discuss on page 9 how missing records were handled in the regression analyses. |
|                        |     | (b) Give reasons for non-participation at each stage                                                                                                                                                                                                                                                      | N/A   | Given use of secondary survey data, this is not applicable                                                                                                                                        |
|                        |     | (c) Consider use of a flow diagram                                                                                                                                                                                                                                                                        | N/A   | Given use of secondary survey data, we chose not to use a flow diagram                                                                                                                            |
| Descriptive data       | 14* | (a) Give characteristics of study participants (eg demographic, clinical, social) and information on exposures and potential confounders                                                                                                                                                                  | 11-13 | See section under “Sample characteristics and bivariate analyses”                                                                                                                                 |
|                        |     | (b) Indicate number of participants with missing data for each variable of interest                                                                                                                                                                                                                       | 11-13 | See table 1                                                                                                                                                                                       |
|                        |     | (c) <i>Cohort study</i> —Summarise follow-up time (eg, average and total amount)                                                                                                                                                                                                                          | N/A   |                                                                                                                                                                                                   |
| Outcome data           | 15* | <i>Cohort study</i> —Report numbers of outcome events or summary measures over time                                                                                                                                                                                                                       |       |                                                                                                                                                                                                   |

1  
2  
3  
4  
5  
6  
7  
8  
9  
10  
11  
12  
13  
14  
15  
16  
17  
18  
19  
20  
21  
22  
23  
24  
25  
26  
27  
28  
29  
30  
31  
32  
33  
34  
35  
36  
37  
38  
39  
40  
41  
42  
43  
44  
45  
46

|              |    |                                                                                                                                                                                                              |       |                                                                                                                                                                                  |
|--------------|----|--------------------------------------------------------------------------------------------------------------------------------------------------------------------------------------------------------------|-------|----------------------------------------------------------------------------------------------------------------------------------------------------------------------------------|
|              |    | <i>Case-control study</i> —Report numbers in each exposure category, or summary measures of exposure                                                                                                         |       |                                                                                                                                                                                  |
|              |    | <i>Cross-sectional study</i> —Report numbers of outcome events or summary measures                                                                                                                           | 11-13 | See Table 1                                                                                                                                                                      |
| Main results | 16 | (a) Give unadjusted estimates and, if applicable, confounder-adjusted estimates and their precision (eg, 95% confidence interval). Make clear which confounders were adjusted for and why they were included | 14    | See Table 2 (unadjusted bivariate associations) before the final adjusted multivariable models are reported in Tables 3-5                                                        |
|              |    | (b) Report category boundaries when continuous variables were categorized                                                                                                                                    | 11-13 | We report category boundaries in Table 1                                                                                                                                         |
|              |    | (c) If relevant, consider translating estimates of relative risk into absolute risk for a meaningful time period                                                                                             | 16-18 | As discussed in the methods, we opted to use Poisson models to calculate prevalence ratio. Overall descriptive statistics for dependent variables are reported in Tables 1 and 2 |

Continued on next page

Confidential: For Review Only

|                          |    |                                                                                                                                                                            |       |                                                                                                                                                                                           |
|--------------------------|----|----------------------------------------------------------------------------------------------------------------------------------------------------------------------------|-------|-------------------------------------------------------------------------------------------------------------------------------------------------------------------------------------------|
| Other analyses           | 17 | Report other analyses done—eg analyses of subgroups and interactions, and sensitivity analyses                                                                             | 18    | See this page for sensitivity analyses results                                                                                                                                            |
| <b>Discussion</b>        |    |                                                                                                                                                                            |       |                                                                                                                                                                                           |
| Key results              | 18 | Summarise key results with reference to study objectives                                                                                                                   | 19    | Initial paragraph of discussion                                                                                                                                                           |
| Limitations              | 19 | Discuss limitations of the study, taking into account sources of potential bias or imprecision. Discuss both direction and magnitude of any potential bias                 | 21-22 | We discuss some of the definitional limitations as well as study weaknesses/limitations                                                                                                   |
| Interpretation           | 20 | Give a cautious overall interpretation of results considering objectives, limitations, multiplicity of analyses, results from similar studies, and other relevant evidence | 20-22 | We give a cautious interpretation of these results and attempt to locate this study within the broader literature in Guatemala and globally                                               |
| Generalisability         | 21 | Discuss the generalisability (external validity) of the study results                                                                                                      | 21-22 | We discuss that a weakness of this study is lack of generalizability outside of Guatemala, though this study might motivate others to assess growth and contraception in other countries. |
| <b>Other information</b> |    |                                                                                                                                                                            |       |                                                                                                                                                                                           |
| Funding                  | 22 | Give the source of funding and the role of the funders for the present study and, if applicable, for the original study on which the present article is based              | 29    | We report funding.                                                                                                                                                                        |

\*Give information separately for cases and controls in case-control studies and, if applicable, for exposed and unexposed groups in cohort and cross-sectional studies.

**Note:** An Explanation and Elaboration article discusses each checklist item and gives methodological background and published examples of transparent reporting. The STROBE checklist is best used in conjunction with this article (freely available on the Web sites of PLoS Medicine at <http://www.plosmedicine.org/>, Annals of Internal Medicine at <http://www.annals.org/>, and Epidemiology at <http://www.epidem.com/>). Information on the STROBE Initiative is available at [www.strobe-statement.org](http://www.strobe-statement.org).

# BMJ Paediatrics Open

## Associations between contraception and stunting in Guatemala: Secondary analysis of the 2014-2015 Demographic and Health Survey

|                               |                                                                                                                                                                                  |
|-------------------------------|----------------------------------------------------------------------------------------------------------------------------------------------------------------------------------|
| Journal:                      | <i>BMJ Paediatrics Open</i>                                                                                                                                                      |
| Manuscript ID                 | bmjpo-2019-000510.R1                                                                                                                                                             |
| Article Type:                 | Original article                                                                                                                                                                 |
| Date Submitted by the Author: | 11-Jul-2019                                                                                                                                                                      |
| Complete List of Authors:     | Flood, David; Wuqu' Kawoq Petersen, Ashley; University of Minnesota<br>Martinez, Boris; Wuqu' Kawoq, Chary, Anita; Wuqu' Kawoq<br>Austad, Kirsten; Wuqu' Kawoq<br>Rohloff, Peter |
| Keywords:                     | Comm Child Health, Epidemiology, Growth, Health services research                                                                                                                |
|                               |                                                                                                                                                                                  |

SCHOLARONE™  
Manuscripts

1  
2  
3 **Associations between contraception and stunting in Guatemala: Secondary analysis of the**  
4  
5 **2014-2015 Demographic and Health Survey**  
6  
7  
8  
9

10 David Flood,<sup>1,2</sup> Ashley Petersen,<sup>3</sup> Boris Martinez,<sup>2</sup> Anita Chary,<sup>2,4</sup> Kirsten Austad,<sup>2,5</sup> Peter  
11 Rohloff<sup>2,6</sup>  
12  
13  
14  
15  
16  
17  
18

19 <sup>1</sup> Departments of Medicine and Pediatrics, University of Minnesota, Minneapolis, MN, United  
20 States  
21  
22

23 <sup>2</sup> Wuqu' Kawoq, Santiago Sacatepéquez, Guatemala  
24  
25

26 <sup>3</sup> Division of Biostatistics, University of Minnesota, Minneapolis, MN, United States  
27

28 <sup>4</sup> Department of Emergency Medicine, Massachusetts General Hospital, Boston, MA, United  
29 States  
30  
31

32 <sup>5</sup> Division of Women's Health, Department of Medicine, Brigham and Women's Hospital,  
33 Boston, MA, United States  
34  
35

36 <sup>6</sup> Division of Global Health Equity, Brigham and Women's Hospital, Boston, MA, United States  
37  
38  
39  
40  
41

42 **Corresponding author:**  
43

44 Peter Rohloff  
45

46 Email: peter@wuqkawoq.org  
47  
48

49 Phone: +502-4958-1253  
50

51 Address: Wuqu' Kawoq  
52  
53

54 2 calle 5-43 zona 1  
55  
56  
57  
58  
59  
60

1  
2  
3 Santiago Sacatepéquez

4  
5 Guatemala 03006

6  
7 Central America

8  
9  
10  
11  
12 Abstract word count: 270

13  
14 Main body text word count: 2,896

15  
16 Number of references: 47

17  
18 Number of tables: 4

19  
20 Number of figures: 0

21  
22  
23  
24  
25  
26 **Acknowledgments:** The authors thank colleagues and program beneficiaries at Wuqu' Kawoq in  
27  
28 Guatemala.

29  
30  
31  
32  
33 **Sources of funding:** This research was supported by the National Institutes of Health's National  
34  
35 Center for Advancing Translational Sciences, grant UL1TR002494. The content is solely the  
36  
37 responsibility of the authors and does not necessarily represent the official views of the National  
38  
39 Institutes of Health's National Center for Advancing Translational Sciences.

40  
41  
42  
43  
44 **Conflict of interest statement:** The authors declare no conflicts of interest.

45  
46  
47  
48  
49 **Contributor statements:** DF conceptualized the study, conducted the statistical analysis, wrote  
50  
51 the initial manuscript draft, and revised the manuscript. AP conducted the statistical analysis and  
52  
53 revised the manuscript. BM, AC, and KA assisted in the interpretation of the statistical models,  
54  
55

1  
2  
3  
4  
5  
6  
7  
8  
9  
10  
11  
12  
13  
14  
15  
16  
17  
18  
19  
20  
21  
22  
23  
24  
25  
26  
27  
28  
29  
30  
31  
32  
33  
34  
35  
36  
37  
38  
39  
40  
41  
42  
43  
44  
45  
46  
47  
48  
49  
50  
51  
52  
53  
54  
55  
56  
57  
58  
59  
60

and revised the manuscript. PR conceptualized the study, assisted in designing and interpreting the statistical models, and revised the manuscript All authors reviewed and approved the final manuscript.

Confidential: For Review Only



## ABSTRACT

**Background:** There has been limited research on the relationship between contraception and child growth in low- and middle-income countries (LMICs). This study examines the association between contraception and child linear growth in Guatemala, a LMIC with a very high prevalence of child stunting. We hypothesize that contraceptive use is associated with better child linear growth and less stunting in Guatemala.

**Methods:** Using representative national data on 12,440 children 0-59 months of age from the 2014-2015 Demographic and Health Survey in Guatemala, we constructed multivariable linear and Poisson regression models to assess whether child linear growth and stunting were associated with contraception variables. All models were adjusted for a comprehensive set of pre-specified confounding variables.

**Results:** Contraceptive use was generally associated with modest, statistically significant greater height-for-age z-score. Current use of a modern method for at least 15 months was associated with a prevalence ratio of stunting of 0.87 (95% CI 0.81 to 0.94;  $p < 0.001$ ), and prior use of a modern method was associated with a prevalence ratio of stunting of 0.93 (95% CI 0.87 to 0.98;  $p < 0.05$ ). The severe stunting models found generally similar associations with modern contraceptive use as the stunting models. There was no significant association between use of a modern method for less than 15 months and the prevalence ratio of stunting or severe stunting.

1  
2  
3 **Conclusions:** Contraceptive use was associated with better child linear growth and less child  
4  
5 stunting in Guatemala. In addition to the human rights imperative to expand contraceptive access  
6  
7 and choice, family planning merits further study as a strategy to improve child growth in  
8  
9  
10 Guatemala and other countries with high prevalence of stunting.  
11  
12  
13  
14  
15  
16  
17  
18  
19  
20  
21  
22  
23  
24  
25  
26  
27  
28  
29  
30  
31  
32  
33  
34  
35  
36  
37  
38  
39  
40  
41  
42  
43  
44  
45  
46  
47  
48  
49  
50  
51  
52  
53  
54  
55  
56  
57  
58  
59  
60

**What is known about the subject:**

- There has been limited research on the relationship between contraception and child growth in low- and middle-income countries like Guatemala.
- Prior studies have shown that indirect markers of family planning utilization such as maternal age, birth intervals, and family size are often associated with improved child growth.
- However, these proxy markers of contraception are disconnected from real-world access and use.

**What this study adds:**

- Use of contraceptive methods were generally associated with modestly better child linear growth and less stunting and severe stunting in Guatemala.
- This is one of the first studies to assess the relationship between contraceptive use and child growth in a low- and middle-income country.
- This analysis adds to the evidence that family planning may have positive spillover effects on child growth.

## INTRODUCTION

Approximately 200 million women in low- and middle-income countries (LMICs) wish to avoid pregnancy but do not use modern contraceptive methods.<sup>1</sup> Access to family planning averts maternal deaths<sup>2</sup> and is supported by rights-based frameworks.<sup>3</sup> Family planning also likely has important spillover effects for child growth, which have been explored in detail by the field of evolutionary anthropology.<sup>4</sup> One mechanistic pathway involves trade-offs between offspring quantity and child health, where larger family size dilutes parental investments, while another involves trade-offs between reproduction and maternal health in which high fertility diminishes maternal physiologic resources directed to the growing child in the post-natal period.<sup>5</sup>

This study examines the relationship between contraception and child linear growth in Guatemala, an upper-middle income country in Central America. Guatemala has Latin America's highest prevalence of stunting,<sup>6</sup> and rural children in Guatemala are among the most stunted populations in the world.<sup>7</sup> Stunting confers significant short- and long-term health risks, and it is thus a critical child health issue in Guatemala and globally.

Understanding the relationship between contraception and child growth is relevant to policymakers and program implementers in Guatemala and other similar contexts seeking to address high levels of child stunting. In the authors' own community nutrition programs in Guatemala, we anecdotally have observed more rapid improvements in child growth in communities with higher utilization of contraception.<sup>8</sup> In general, research in LMICs has demonstrated that pregnancy intention is variably associated with stunting<sup>9-15</sup> and that proxy

1  
2  
3 markers of family planning utilization such as maternal age, birth intervals, and family size are  
4 associated with improved child linear growth.<sup>4 16-19</sup> However, retrospective assessments of  
5 pregnancy intention are subject to bias,<sup>20 21</sup> and the import of proxy markers of family planning  
6 utilization are not always intuitive to health policy decision makers who must make concrete  
7 decisions about investments to expand contraceptive access or uptake. Few studies of child  
8 stunting have utilized direct measures of family planning such as modern contraceptive use or  
9 unmet need for family planning, which have emerged as critical metrics in the family planning  
10 movement.<sup>22</sup> Within this background, we examine contraception usage in Guatemala using direct  
11 measures, and we hypothesize that usage is associated with better child linear growth and less  
12 stunting.  
13  
14  
15  
16  
17  
18  
19  
20  
21  
22  
23  
24  
25  
26  
27

## 28 **METHODS**

### 29 **Study design and sample**

30  
31  
32  
33 To assess the association between contraception and child growth in Guatemala, we conducted a  
34 secondary analysis of survey data from the 2014-2015 Demographic and Health Survey (DHS).  
35 Details on survey design can be found in the DHS report.<sup>23</sup> We used the Children's Recode file,  
36 which comprises 12,440 children ages 0-59 months.  
37  
38  
39  
40  
41  
42  
43  
44  
45  
46  
47  
48

### 49 **Patient involvement**

50 Patients were not directly involved in the design of this study.  
51  
52  
53  
54  
55  
56  
57  
58  
59  
60

### Dependent variables

The dependent variables related to child growth. Child length/height-for-age z-score (HAZ) was utilized as a continuous dependent variable, and the presence of stunting ( $HAZ \leq -2.0$ ) or severe stunting ( $HAZ \leq -3.0$ ) were utilized as binary dependent variables. HAZ was based on WHO reference standards.<sup>24</sup>

### Independent variables

The independent variables related to contraception use including current use, prior use, and duration of current use (dichotomized to more or less than the median period of use of 15 months). We used DHS definitions of contraceptive type (modern method, traditional method, and no use) with the exception of classifying “folkloric methods” (0.1% of sample) as no use. Modern methods included pills, intrauterine devices, injections, condoms, implant, sterilization, lactational amenorrhea, and other modern methods. Traditional methods included periodic abstinence and withdrawal. Additionally, we included proxy markers of contraception including preceding birth interval (no preceding interval, less than 24 months, or 24 months or greater) and birth order (defined as a continuous variable given observed linearity between HAZ and birth order). Details on the techniques used to collect data on contraceptive use and a full example questionnaire can be found as a technical appendix in the survey’s final report.<sup>23</sup>

### Confounding variables

1  
2  
3 Confounding variables were selected *a priori* for model inclusion based on a review of global  
4 stunting literature,<sup>7 25</sup> predictors of child stunting reported in previous research conducted in  
5 Guatemala,<sup>26 27</sup> and the authors' country-specific expertise.<sup>28-30</sup>  
6  
7  
8  
9

10  
11  
12 Continuous confounding variables included age of child in months, age of mother in years, and  
13 household wealth index. Given known non-linearity between HAZ and these continuous  
14 variables, for each we pre-specified restricted cubic splines with five knots at quantiles as  
15 recommended by Harrell.<sup>31</sup>  
16  
17  
18  
19  
20  
21  
22  
23

24 Categorical confounding variables included child sex, area of residence (urban, rural), maternal  
25 and partner education attainment (none, incomplete primary, primary, incomplete secondary,  
26 complete secondary, and higher), maternal literacy (not literate, semi-literate, literate), maternal  
27 marital status (never in union, partnered, or formerly partnered), region of country, ethnic group  
28 by self-identification, language spoken in the home, and presence of diarrhea in the last two  
29 weeks. Of note, variables relating to sanitation facilities and water access were controlled  
30 through their incorporation into the household wealth index.  
31  
32  
33  
34  
35  
36  
37  
38  
39  
40  
41

## 42 **Statistical analysis**

43  
44  
45  
46

47 We took into account survey weighting, clustering at the PSU level, and sampling design using  
48 Stata's *svyset* command and estimated variance using the Taylor linearization. We used Stata  
49 version 13 (College Station, TX) for all analyses and did not correct p-values for multiple  
50 testing.  
51  
52  
53  
54  
55  
56  
57  
58  
59  
60

1  
2  
3  
4  
5 First, we generated population descriptive statistics and assessed the bivariate relationships  
6  
7  
8 between independent and dependent variables.  
9

10  
11  
12 We then constructed a set of multivariable linear regression models to test the hypothesis that  
13  
14  
15 contraception is associated with HAZ. The same pre-specified confounding variables were  
16  
17  
18 included in all models. The first set of models utilized independent variables related to  
19  
20  
21 contraceptive use: current contraceptive use (Model 1A); adding prior contraceptive use to  
22  
23  
24 Model 1A (Model 1B); adding duration of current contraceptive use to Model 1B (Model 1C),  
25  
26  
27 and adding proxy variables of contraception of birth interval and birth order to Model 1C (Model  
28  
29  
30 1D).

31  
32  
33 Next, in order to test whether contraception was associated with the presence of stunting and  
34  
35  
36 severe stunting, we specified two multivariable Poisson regression models with the same  
37  
38  
39 independent variables as in the most specified model that did not include proxy variables of  
40  
41  
42 contraception (Model 1C); we made this decision based on our assumption that birth interval and  
43  
44  
45 birth order were assessing the same underlying concept as the independent variables of  
46  
47  
48 contraceptive use. Poisson rather than logistic regression was used in order to facilitate the  
49  
50  
51 interpretation of results as prevalence ratios rather than odds ratios.<sup>32</sup> The same pre-specified  
52  
53  
54 confounding variables were included in the Poisson models.  
55  
56  
57

58  
59  
60 Finally, we carried out sensitivity analyses. First, we added maternal height as a continuous  
variable to the models with listwise deletion of records with missing data. A powerful predictor



1  
2  
3 of child growth both globally<sup>33 34</sup> and in Guatemala,<sup>27 35</sup> maternal height was excluded from the  
4  
5 primary models due to the degree of missing data (8.0% records missing). Second, we re-  
6  
7 specified the models to include proxy variables of family health care access including place of  
8  
9 delivery, money and distance as a problem in accessing medical care, and number of antenatal  
10  
11 visits (categorized into fewer than 4 visits, 4 or more visits, or missing data). We opted not to  
12  
13 include these variables in the main models as we assumed they were measuring a similar  
14  
15 underlying concept as access to contraception. Third, given widespread food insecurity in  
16  
17 Guatemala<sup>30</sup> and the previously reported association between dietary indicators and growth,<sup>36</sup> we  
18  
19 included minimum meal frequency (if a child receives meals the minimum number of times per  
20  
21 day, adjusted for breastfeeding and age) and minimum dietary diversity (if a child consumes  
22  
23 food from 4 or more food groups per day) as dichotomous variables based on WHO definitions  
24  
25 and ran the models on applicable children ages 6-23 months (n=3,520).<sup>37</sup> In addition to main  
26  
27 results reported in the manuscript, full regression results from all models and sensitivity analyses  
28  
29 are includes as online Supplementary Files.  
30  
31  
32  
33  
34  
35  
36  
37

## 38 **Ethics**

39  
40  
41  
42 The use of survey data for this study was approved by DHS. We followed STROBE guidelines  
43  
44 in reporting our research.<sup>38</sup>  
45  
46  
47  
48

## 49 **RESULTS**

### 50 51 52 53 54 **Sample characteristics and bivariate analyses**

1  
2  
3  
4  
5 The characteristics of children included in the analyses are shown in Table 1 and bivariate  
6 relationships in Table 2. Child height data was available for 11,674 of the 12,440 records  
7  
8 available in the DHS file (missing data of 6.2%). Among these children, the mean HAZ was -  
9  
10 1.68 (SD 1.14), the prevalence of stunting was 39.1% (95% CI 37.4 to 40.8), and the prevalence  
11  
12 of severe stunting was 12.1% (95% CI 11.0 to 13.4). Among the mothers of these children, the  
13  
14 prevalence of current modern contraceptive use less than 15 months was 22.9% (95% CI 21.7 to  
15  
16 24.2) and greater than 15 months of 21.9% (95% CI 20.8 to 23.1). Among users of less than 15  
17  
18 months, the most common methods were short-acting hormonal injections (47.9%), sterilization  
19  
20 (21.1%), and condoms (12.6%); among users of more than 15 months, the most common  
21  
22 methods similarly were short-acting hormonal injections (42.6%), sterilization (38.3%), and  
23  
24 condoms (5.5%). Among all users the overall prevalence of prior modern contraceptive use was  
25  
26 38.8% (95% CI 37.3 to 40.3). In the bivariate analysis, use of modern and traditional  
27  
28 contraceptive types was generally associated with better HAZ and lower prevalence of stunting  
29  
30 and severe stunting.  
31  
32  
33  
34  
35  
36  
37  
38  
39

40 [Table 1]

41  
42  
43  
44 [Table 2]

#### 45 46 47 48 49 **Multivariable regression with dependent variable of HAZ**

1  
2  
3 Table 3 shows the results of the independent variables in multivariable linear regression Models  
4  
5 1A-1D. Full results of models are provided in the Supplementary File 1. Current and prior use of  
6  
7 contraceptive methods were associated with statistically significant better HAZ (overall p-value  
8  
9 <0.001 for these categorical variables in all models). When duration of current modern use was  
10  
11 included (Model 1C), use for  $\geq 15$  months was associated with a 0.20 (95% CI 0.13 to 0.26,  
12  
13 p<0.001) higher in HAZ, but modern use for <15 months was not statistically significant. The  
14  
15 addition of variables of birth interval and birth order (Model 1D) did not significantly change the  
16  
17 coefficient estimates for the contraceptive variables.  
18  
19  
20  
21  
22  
23

#### 24 **Multivariable regression with dependent variable of stunting and severe stunting**

25  
26  
27

28 [Table 4]  
29  
30  
31  
32

33 Table 4 shows the results of the multivariable Poisson regression models assessing stunting and  
34  
35 severe stunting. Full results of models are provided in the Supplementary File 1. The  
36  
37 independent variables of current and prior use of contraception both were statistically significant  
38  
39 for the outcomes of stunting and severe stunting (overall p-value <0.05). Compared with no  
40  
41 contraceptive use, current use of a modern contraceptive method for  $\geq 15$  months was associated  
42  
43 with a prevalence ratio of stunting of 0.87 (95% CI 0.81 to 0.94, p<0.001) and severe stunting of  
44  
45 0.61 (95% CI 0.50 to 0.73, p<0.001). Prior use of either traditional or modern contraceptive  
46  
47 types also was associated with statistically significantly lower prevalence of stunting and severe  
48  
49 stunting.  
50  
51  
52  
53  
54  
55  
56  
57  
58  
59  
60

## Sensitivity analyses

Selected regression output for the sensitivity analyses is included in Supplementary File 2. The results of the sensitivity analyses with maternal height and dietary covariates were similar to the main analysis. When variables relating to health care access were included, the same significant associations of HAZ with contraceptive use were observed in the linear models though the estimate sizes appeared smaller. In the Poisson models, inclusion of health care access variables made the associations between modern contraceptive use and stunting non-significant; the significant association between modern contraceptive use and severe stunting persisted.

## DISCUSSION

This study was a secondary analysis of contraception and child growth using 2014-2015 Guatemala DHS data. In the multivariable linear regression models, contraceptive use and need were associated with statistically significant changes in child linear growth as measured by HAZ. In the multivariable Poisson regression models, contraceptive use was associated with statistically significant lower prevalence of stunting and severe stunting.

While the magnitude of the associations reported in this study is modest, these results should be viewed in the context of other strategies to improve child growth. A meta-analysis of evidence-based interventions for child nutrition reported the effect size of nutrition education in food-insecure populations of 0.25 HAZ and complementary food provision of 0.39 HAZ.<sup>39</sup> Trials of water, sanitation, and hygiene (WASH) interventions have not consistently found benefit.<sup>40</sup> A

1  
2  
3 review of context-specific nutrition programs found a median reduction in child stunting of 3%  
4  
5 per year.<sup>41</sup> These sobering figures reiterate that stunting arises from a complex political,  
6  
7 economic, and social context that can only be partially attenuated via technical intervention.<sup>25</sup>  
8  
9

10  
11 This research is, to our knowledge, one of the few studies assessing direct measures of modern  
12  
13 contraceptive use against child growth. As discussed in the introduction, other researchers have  
14  
15 explored the relationship between family planning and child growth principally by focusing on  
16  
17 pregnancy intention or indirect metrics of contraception like birth intervals, maternal age, and  
18  
19 family size. Such measures have generally been found to be associated with child growth, often  
20  
21 using underlying DHS data.<sup>4 16-19</sup> However, indirect measures are difficult to translate into  
22  
23 policy decision, whereas contraceptive usage rates lend themselves best to discussion of  
24  
25 improving investments and infrastructure for delivery. Here, our results demonstrating that direct  
26  
27 measures of contraceptive use are associated with better child growth in Guatemala provide  
28  
29 further concrete support for policy officials and global health workers of the spillover benefits of  
30  
31 family planning.  
32  
33  
34  
35  
36  
37  
38  
39

40 Several findings that emerged from this work merit additional comment. First, an unexpected  
41  
42 result was that use of traditional methods was generally associated with similar changes in child  
43  
44 growth and stunting compared to use of modern methods. We caution that our study was not  
45  
46 intended to test the ordering of contraceptive types on child growth, does not address  
47  
48 contraceptive efficacy, and is subject to methodological issues. For example, self-reporting of  
49  
50 traditional contraceptive use might reflect residual confounders such as maternal autonomy,  
51  
52 which was not incorporated in this analysis but has been associated with stunting in other  
53  
54  
55  
56  
57  
58  
59  
60

1  
2  
3 settings.<sup>42</sup> In addition, we used DHS-aligned definitions of contraceptive type (modern or  
4 traditional), but the distinction between modern versus traditional methods has been debated.<sup>43</sup>  
5  
6 We justify the definitions utilized in this study as appropriate given that it is the classification  
7  
8 scheme currently recommended by DHS.  
9  
10  
11  
12

13  
14 Second, the relationship between current modern contraceptive use and HAZ seemed to be  
15  
16 “dose-dependent,” as current use of modern methods for 15 or more months was associated with  
17  
18 statistically significant improvements in child HAZ and stunting, while users of less than 15  
19  
20 months had no significant difference in child growth compared to those not using contraception.  
21  
22  
23

24  
25  
26 Third, the association between contraception and child growth persisted even in the analysis  
27  
28 (Model 1D) that controlled for birth number and antecedent birth intervals. Although we cannot  
29  
30 exclude the possibility of residual confounding in our models, this may suggest that the impact  
31  
32 of contraception on child growth may not be solely mediated through offspring number and  
33  
34 timing. As discussed in the introduction, there are various potential causal mechanisms put forth  
35  
36 by evolutionary anthropologists linking contraception to child growth; the most well-described  
37  
38 pathway involves increased household resources directed to children in smaller families. As  
39  
40 discussed below, future research using methods like structural equation modeling might help  
41  
42 elucidate these pathways.  
43  
44  
45  
46  
47  
48

49 The strengths of this study include use of a recently released, representative DHS survey that  
50  
51 permitted current population-level estimates of change in HAZ and stunting in Guatemala.  
52  
53  
54 Additionally, our prior ethnographic and programmatic experience in Guatemala assisted in  
55  
56  
57  
58  
59  
60

1  
2  
3 selection of a comprehensive set of covariates tailored to the setting. In response to critiques of  
4  
5 DHS studies arising from the economics literature, we also carefully specified non-linear  
6  
7 relationships between continuous covariates and HAZ.<sup>44</sup> A final study strength is our thorough  
8  
9 sensitivity analyses. Most of our sensitivity analyses supported our primary findings, although  
10  
11 inclusion of variables relating to access to and utilization of health services weakened the  
12  
13 association between stunting and contraception use in the Poisson regression model.  
14  
15  
16  
17  
18

19 This research has some additional limitations and weaknesses. First, this study used data from a  
20  
21 single survey in Guatemala, which limits generalizability to other countries. At the same time, an  
22  
23 advantage of using single-country data is that it allowed us to carefully select confounders of  
24  
25 interest based on stunting risk factors in a single context. Second, use of secondary survey data  
26  
27 does not permit us to infer causality and raises the possibility of residual confounding. Potential  
28  
29 examples include dimensions of wealth not captured in asset-based indices,<sup>45</sup> maternal  
30  
31 autonomy,<sup>42</sup> or paternal anthropometry.<sup>46</sup> Third, we are unsure of the accuracy of self-reported  
32  
33 contraceptive data in large surveys in Guatemala. In our own ethnographic and programmatic  
34  
35 experience, family planning can be a delicate topic in Guatemalan households.  
36  
37  
38  
39  
40  
41

42 Our study suggests multiple directions for future research on the relationship between  
43  
44 contraception and child growth. Since our analysis was not intended to assess mechanism of  
45  
46 impact of contraception on child growth, use of structural equation modeling with DHS data  
47  
48 would permit could delineate pathways and mediators of this relationship. Multi-country studies  
49  
50 would be useful to further evaluate the association between contraceptive need and child growth.  
51  
52  
53 Aggregating data across countries would also facilitate analysis of the association between child  
54  
55  
56  
57  
58  
59  
60

1  
2  
3 growth and use of long-acting reversible contraceptives, which are increasingly emphasized in  
4 the global reproductive health literature. Given the difficulty in designing an ethically rigorous  
5 randomized trial examining the impact of a contraception intervention on child growth,  
6 alternative methodological and statistical approaches to infer causality would be helpful. Such  
7 strategies could also help better understand the dynamic process of contraceptive discontinuation  
8 and its impact on child growth.<sup>47</sup>  
9  
10  
11  
12  
13  
14  
15  
16  
17  
18

19 In conclusion, using secondary survey data in Guatemala, this study found an association  
20 between direct measures of contraception and better child growth outcomes that was modest in  
21 magnitude yet significant from a public health perspective. In addition to the human rights  
22 imperative to expand contraceptive access and choice, family planning merits further research  
23 and policy consideration as a strategy to improve child growth in Guatemala and similar  
24 countries with high prevalence of stunting.  
25  
26  
27  
28  
29  
30  
31  
32  
33  
34  
35  
36  
37  
38  
39  
40  
41  
42  
43  
44  
45  
46  
47  
48  
49  
50  
51  
52  
53  
54  
55  
56  
57  
58  
59  
60



**REFERENCES**

1. Darroch JE, Singh S. Trends in contraceptive need and use in developing countries in 2003, 2008, and 2012: an analysis of national surveys. *Lancet* 2013;381(9879):1756-62.
2. Ahmed S, Li Q, Liu L, et al. Maternal deaths averted by contraceptive use: an analysis of 172 countries. *Lancet* 2012;380(9837):111-25.
3. Starrs AM, Ezeh AC, Barker G, et al. Accelerate progress-sexual and reproductive health and rights for all: report of the Guttmacher-Lancet Commission. *Lancet* 2018
4. Fink G, Sudfeld CR, Danaei G, et al. Scaling-up access to family planning may improve linear growth and child development in low and middle income countries. *PLoS One* 2014;9(7):e102391.
5. Lawson DW, Uggla C. Family Structure and Health in the Developing World: What Can Evolutionary Anthropology Contribute to Population Health Science? In: Gibson MA, Lawson DW, eds. *Applied Evolutionary Anthropology: Darwinian Approaches to Contemporary World Issues*. New York, NY: Springer New York, 2014:85-118.
6. Corvalan C, Garmendia ML, Jones-Smith J, et al. Nutrition status of children in Latin America. *Obes Rev* 2017;18 Suppl 2:7-18.
7. Black RE, Victora CG, Walker SP, et al. Maternal and child undernutrition and overweight in low-income and middle-income countries. *Lancet* 2013;382(9890):427-51.
8. Martinez B, Flood D, Knop K, et al. Improving infant and young child nutrition in a highly stunted rural community: A practical case study from Guatemala. In: Preedy VR, Patel VB, eds. *Famine, starvation and nutrient deprivation: from cells to policy*. Cham, Switzerland: Springer International Publishing, 2017.

- 1  
2  
3 9. Singh A, Chalasani S, Koenig MA, et al. The consequences of unintended births for  
4 maternal and child health in India. *Popul Stud (Camb)* 2012;66(3):223-39.  
5  
6
- 7  
8 10. Montgomery M, Lloyd C, Hewett P, et al. *The Consequences of Imperfect Fertility*  
9  
10 *Control for Children's Survival, Health, and Schooling*. Calverton, Maryland: Macro  
11 International Inc, 1997.  
12  
13
- 14  
15 11. Upadhyay AK, Srivastava S. Effect of pregnancy intention, postnatal depressive  
16 symptoms and social support on early childhood stunting: findings from India. *BMC*  
17 *Pregnancy Childbirth* 2016;16:107.  
18  
19
- 20  
21 12. Marston C, Cleland J. Do unintended pregnancies carried to term lead to adverse  
22 outcomes for mother and child? An assessment in five developing countries. *Popul Stud*  
23 *(Camb)* 2003;57(1):77-93.  
24  
25
- 26  
27 13. Shapiro-Mendoza C, Selwyn BJ, Smith DP, et al. Parental pregnancy intention and early  
28 childhood stunting: findings from Bolivia. *Int J Epidemiol* 2005;34(2):387-96.  
29  
30
- 31  
32 14. Rahman MM. Is Unwanted Birth Associated with Child Malnutrition in Bangladesh? *Int*  
33 *Perspect Sex Reprod Health* 2015;41(2):80-8.  
34  
35
- 36  
37 15. Baschieri A, Machiyama K, Floyd S, et al. Unintended Childbearing and Child Growth in  
38 Northern Malawi. *Matern Child Health J* 2017;21(3):467-74.  
39  
40
- 41  
42 16. Finlay JE, Ozaltin E, Canning D. The association of maternal age with infant mortality,  
43 child anthropometric failure, diarrhoea and anaemia for first births: evidence from 55  
44 low- and middle-income countries. *BMJ Open* 2011;1(2):e000226.  
45  
46
- 47  
48 17. Ikeda N, Irie Y, Shibuya K. Determinants of reduced child stunting in Cambodia:  
49 analysis of pooled data from three demographic and health surveys. *Bull World Health*  
50 *Organ* 2013;91(5):341-9.  
51  
52  
53  
54  
55  
56  
57  
58  
59  
60

- 1  
2  
3 18. Naik R, Smith R. *Impacts of Family Planning on Nutrition*. Washington, D.C.: Futures  
4 Group, Health Policy Project, 2015.  
5  
6  
7  
8 19. Rutstein S, Winter R. *The Effects of Fertility Behavior on Child Survival and Child*  
9  
10 *Nutritional Status: Evidence from the Demographic and Health Surveys, 2006 to 2012*.  
11  
12 Rockville, Maryland, USA: ICF International, 2014.  
13  
14  
15 20. Chalasani S, Casterline JB, Koenig MA. Consequences of unwanted childbearing: A  
16  
17 study of child outcomes in Bangladesh. Annual Meeting of the Population Association of  
18  
19 America, 29-31 March 2007. New York, 2007.  
20  
21  
22 21. Gipson JD, Koenig MA, Hindin MJ. The effects of unintended pregnancy on infant,  
23  
24 child, and parental health: a review of the literature. *Stud Fam Plann* 2008;39(1):18-38.  
25  
26  
27 22. Cahill N, Sonneveldt E, Stover J, et al. Modern contraceptive use, unmet need, and  
28  
29 demand satisfied among women of reproductive age who are married or in a union in the  
30  
31 focus countries of the Family Planning 2020 initiative: a systematic analysis using the  
32  
33 Family Planning Estimation Tool. *Lancet* 2018;391(10123):870-82.  
34  
35  
36 23. Ministerio de Salud Pública y Asistencia Social, Instituto Nacional de Estadística, ICF  
37  
38 International. *VI Encuesta Nacional de Salud Materno Infantil (ENSMI) 2014-2015:*  
39  
40 *Informe Final*. Guatemala: MSPAS, INE, ICF, 2017.  
41  
42  
43 24. WHO Multicentre Growth Reference Study Group. WHO Child Growth Standards based  
44  
45 on length/height, weight and age. *Acta Paediatr Suppl* 2006;450:76-85.  
46  
47  
48 25. Stewart CP, Iannotti L, Dewey KG, et al. Contextualising complementary feeding in a  
49  
50 broader framework for stunting prevention. *Matern Child Nutr* 2013;9 Suppl 2:27-45.  
51  
52  
53  
54  
55  
56  
57  
58  
59  
60

- 1  
2  
3 26. Sereebutra P, Solomons N, Aliyu MH, et al. Sociodemographic and environmental  
4 predictors of childhood stunting in rural Guatemala. *Nutrition Research* 2006;26(2):65-  
5  
6 70.  
7  
8  
9  
10 27. Lee J, Houser RF, Must A, et al. Disentangling nutritional factors and household  
11 characteristics related to child stunting and maternal overweight in Guatemala. *Econ Hum*  
12 *Biol* 2010;8(2):188-96.  
13  
14  
15  
16 28. Chary A, Messmer S, Sorenson E, et al. The Normalization of Childhood Disease: An  
17 Ethnographic Study of Child Malnutrition in Rural Guatemala. *Human Organization*  
18 2013;72(2):87-97.  
19  
20  
21  
22 29. Chary A, Rohloff P, editors. *Privatization and the New Medical Pluralism: Shifting*  
23 *Healthcare Landscapes in Maya Guatemala*. Lanham, Maryland: Lexington Press, 2015.  
24  
25  
26  
27 30. Brown K, Henretty N, Chary A, et al. Mixed-methods study identifies key strategies for  
28 improving infant and young child feeding practices in a highly stunted rural indigenous  
29 population in Guatemala. *Matern Child Nutr* 2016;12(2):262-77.  
30  
31  
32  
33 31. Harrell Jr. FE. *Regression Modeling Strategies, Second Edition*: Springer, 2015.  
34  
35  
36 32. Barros AJ, Hirakata VN. Alternatives for logistic regression in cross-sectional studies: an  
37 empirical comparison of models that directly estimate the prevalence ratio. *BMC Med*  
38 *Res Methodol* 2003;3:21.  
39  
40  
41  
42 33. Addo OY, Stein AD, Fall CH, et al. Maternal height and child growth patterns. *J Pediatr*  
43 2013;163(2):549-54.  
44  
45  
46  
47 34. Ozaltin E, Hill K, Subramanian SV. Association of maternal stature with offspring  
48 mortality, underweight, and stunting in low- to middle-income countries. *JAMA*  
49 2010;303(15):1507-16.  
50  
51  
52  
53  
54  
55  
56  
57  
58  
59  
60

- 1  
2  
3 35. Hambidge KM, Mazariegos M, Kindem M, et al. Infant stunting is associated with short  
4 maternal stature. *J Pediatr Gastroenterol Nutr* 2012;54(1):117-9.  
5  
6  
7  
8 36. Arimond M, Ruel MT. Dietary diversity is associated with child nutritional status:  
9 evidence from 11 demographic and health surveys. *J Nutr* 2004;134(10):2579-85.  
10  
11  
12 37. World Health Organization. *Indicators for assessing infant and young child feeding*  
13 *practices: Part 2: Measurement*. Geneva, Switzerland: WHO, 2010.  
14  
15  
16  
17 38. von Elm E, Altman DG, Egger M, et al. The Strengthening the Reporting of  
18 Observational Studies in Epidemiology (STROBE) statement: guidelines for reporting  
19 observational studies. *Bull World Health Organ* 2007;85(11):867-72.  
20  
21  
22  
23 39. Bhutta ZA, Das JK, Rizvi A, et al. Evidence-based interventions for improvement of  
24 maternal and child nutrition: what can be done and at what cost? *Lancet*  
25 2013;382(9890):452-77.  
26  
27  
28  
29  
30 40. Cumming O, Cairncross S. Can water, sanitation and hygiene help eliminate stunting?  
31 Current evidence and policy implications. *Matern Child Nutr* 2016;12 Suppl 1:91-105.  
32  
33  
34 41. Hossain M, Choudhury N, Adib Binte Abdullah K, et al. Evidence-based approaches to  
35 childhood stunting in low and middle income countries: a systematic review. *Arch Dis*  
36 *Child* 2017;102(10):903-09.  
37  
38  
39  
40 42. Shroff M, Griffiths P, Adair L, et al. Maternal autonomy is inversely related to child  
41 stunting in Andhra Pradesh, India. *Matern Child Nutr* 2009;5(1):64-74.  
42  
43  
44 43. Austad K, Chary A, Colom A, et al. Fertility Awareness Methods Are Not Modern  
45 Contraceptives: Defining Contraception to Reflect Our Priorities. *Glob Health Sci Pract*  
46 2016;4(2):342-5.  
47  
48  
49  
50  
51  
52  
53  
54  
55  
56  
57  
58  
59  
60

- 1  
2  
3 44. Cummins JR. On the Use and Misuse of Child Height-for-Age z-score in the  
4  
5 Demographic and Health Surveys: Working Paper 201417. Riverside, CA: University of  
6  
7 California at Riverside, Department of Economics, 2014.  
8  
9  
10 45. Hruschka DJ, Hadley C, Hackman J. Material wealth in 3D: Mapping multiple paths to  
11  
12 prosperity in low- and middle- income countries. *PLoS One* 2017;12(9):e0184616.  
13  
14 46. Addo OY, Stein AD, Fall CH, et al. Parental childhood growth and offspring birthweight:  
15  
16 pooled analyses from four birth cohorts in low and middle income countries. *Am J Hum*  
17  
18 *Biol* 2015;27(1):99-105.  
19  
20  
21 47. Barden-O'Fallon JL, Speizer IS, White JS. Association between contraceptive  
22  
23 discontinuation and pregnancy intentions in Guatemala. *Rev Panam Salud Publica*  
24  
25 2008;23(6):410-7.  
26  
27  
28  
29  
30  
31  
32  
33  
34  
35  
36  
37  
38  
39  
40  
41  
42  
43  
44  
45  
46  
47  
48  
49  
50  
51  
52  
53  
54  
55  
56  
57  
58  
59  
60

## TABLES

Table 1: Survey-weighted characteristics of children in the sample

| Characteristic                                        | Number | Population estimate          |
|-------------------------------------------------------|--------|------------------------------|
| <i>Dependent variables</i>                            |        |                              |
| <b>HAZ, mean (SD)</b>                                 | 11,674 | -1.68 (1.14)                 |
| <b>Stunted, % (95% CI)</b>                            | 11,674 | 39.1 (37.4 to 40.8)          |
| <b>Severely stunted, % (95% CI)</b>                   | 11,674 | 12.1 (11.0 to 13.4)          |
| <i>Independent variables</i>                          |        |                              |
| <b>Maternal current contraceptive use, % (95% CI)</b> | 12,440 |                              |
| No use                                                |        | 44.3 (42.8 to 45.9)          |
| Traditional method                                    |        | 10.9 (10.1 to 11.7)          |
| Modern method, <15 months                             |        | 22.9 (21.7 to 24.2)          |
| Modern method, ≥15 months                             |        | 21.9 (20.8 to 23.1)          |
| <b>Maternal prior contraceptive use, % (95% CI)</b>   | 12,440 |                              |
| No use                                                |        | 49.8 (48.3 to 51.4)          |
| Traditional method                                    |        | 11.4 (10.5 to 12.4)          |
| Modern method                                         |        | 38.8 (37.3 to 40.3)          |
| <b>Birth interval, % (95% CI)</b>                     | 12,440 |                              |
| Less than 24 months                                   |        | 12.8 (12.0 to 13.6)          |
| 24 months or greater                                  |        | 55.3 (54.2 to 56.5)          |
| No preceding interval                                 |        | 31.9 (30.9 to 33.0)          |
| <b>Birth order, median (IQR)</b>                      | 12,440 | 2 (1 to 4)                   |
| <i>Confounding variables</i>                          |        |                              |
| <b>Child's age in months, median (IQR)</b>            | 11,962 | 29 (14 to 44)                |
| <b>Mother age in years, median (IQR)</b>              | 12,440 | 27 (23 to 32)                |
| <b>Wealth index, median (IQR)</b>                     | 12,440 | -49,854 (-107,310 to 33,359) |

|                                            |        |                     |
|--------------------------------------------|--------|---------------------|
| <b>Male sex, % (95% CI)</b>                | 12,440 | 51.9 (50.9 to 52.9) |
| <b>Rural area of residence, % (95% CI)</b> | 12,440 | 64.2 (62.2 to 66.2) |
| <b>Maternal education, % (95% CI)</b>      | 12,440 |                     |
| None                                       |        | 18.9 (17.5 to 20.3) |
| Incomplete primary                         |        | 35.2 (33.7 to 36.7) |
| Primary                                    |        | 17.3 (16.3 to 18.3) |
| Incomplete secondary                       |        | 17.7 (16.6 to 18.9) |
| Complete secondary                         |        | 7.4 (6.6 to 8.2)    |
| Higher                                     |        | 3.6 (3.2 to 4.2)    |
| <b>Partner education, % (95% CI)</b>       | 12,440 |                     |
| No education                               |        | 12.5 (11.5 to 13.7) |
| Incomplete primary                         |        | 31.0 (29.7 to 32.4) |
| Primary                                    |        | 19.6 (18.6 to 20.7) |
| Incomplete secondary                       |        | 19.3 (18.1 to 20.6) |
| Complete secondary                         |        | 8.4 (7.7 to 9.2)    |
| Higher                                     |        | 4.4 (3.9 to 5.0)    |
| No partner or unknown                      |        | 4.7 (4.2 to 5.2)    |
| <b>Maternal literacy, % (95% CI)</b>       | 12,432 |                     |
| Not literate                               |        | 21.4 (19.8 to 23.0) |
| Semi-literate                              |        | 12.9 (11.9 to 13.9) |
| Literate                                   |        | 65.8 (63.9 to 67.6) |
| <b>Maternal marital status, % (95% CI)</b> | 12,440 |                     |
| Never in union                             |        | 4.5 (4.0 to 5.0)    |
| Current partner                            |        | 87.5 (86.7 to 88.3) |
| Former partner                             |        | 8.0 (7.4 to 8.7)    |
| <b>Region of country, % (95% CI)</b>       | 12,440 |                     |
| Metropolitan Guatemala City                |        | 15.4 (13.8 to 17.2) |



|                                                  |        |                     |
|--------------------------------------------------|--------|---------------------|
| North                                            |        | 11.3 (10.0 to 12.8) |
| Northeast                                        |        | 9.1 (8.0 to 10.4)   |
| Southeast                                        |        | 8.9 (8.0 to 9.9)    |
| Central                                          |        | 10.7 (9.7 to 11.9)  |
| Southwest                                        |        | 23.6 (22.2 to 25.1) |
| Northwest                                        |        | 16.9 (15.3 to 18.6) |
| Petén                                            |        | 4.0 (3.3 to 4.9)    |
| <b>Indigenous ethnicity, % (95% CI)</b>          | 12,436 | 51.9 (49.4 to 54.4) |
| <b>Mayan language spoken in home, % (95% CI)</b> | 12,440 | 30.5 (27.9 to 33.2) |
| <b>Diarrhea last 2 weeks, % (95% CI)</b>         | 12,038 | 19.2 (18.3 to 20.3) |

CI, confidence interval; HAZ, height-for-age z-score; IQR, interquartile range; SD, standard deviation. “Population estimate” refers to calculations that account for survey weighting and sampling design, thus making the values nationally representative in Guatemala. Of note, estimates differ slightly from the DHS report, which uses the Household Member Recode in its calculations.

**Table 2: Bivariate relationships between dependent and independent variables**

|                                  | <b>HAZ, mean (95% CI)</b> | <b>Stunted, % (95% CI)</b> | <b>Severely stunted, % (95% CI)</b> |
|----------------------------------|---------------------------|----------------------------|-------------------------------------|
| <b>Current contraceptive use</b> |                           |                            |                                     |
| No use                           | -1.86 (-1.92 to -1.80)    | 45.1 (42.8 to 47.6)        | 16.3 (14.5 to 18.2)                 |
| Traditional method               | -1.72 (-1.81 to -1.63)    | 40.5 (36.8 to 44.4)        | 12.1 (9.8 to 15.0)                  |
| Modern method, <15 months        | -1.53 (-1.60 to -1.47)    | 33.4 (30.6 to 36.3)        | 9.1 (7.6 to 10.8)                   |
| Modern method, ≥15 months        | -1.47 (-1.53 to -1.41)    | 32.5 (30.2 to 34.8)        | 7.2 (6.0 to 8.5)                    |
| <b>Prior contraceptive use</b>   |                           |                            |                                     |
| No use                           | -1.83 (-1.89 to -1.78)    | 44.5 (42.3 to 46.7)        | 15.4 (13.8 to 17.2)                 |
| Traditional method               | -1.65 (-1.74 to -1.56)    | 36.7 (33.2 to 40.3)        | 9.9 (7.9 to 12.3)                   |
| Modern method                    | -1.50 (-1.55 to -1.45)    | 32.9 (30.8 to 35.0)        | 8.5 (7.3 to 9.8)                    |
| <b>Birth interval</b>            |                           |                            |                                     |
| Less than 24 months              | -1.98 (-2.06 to -1.90)    | 49.7 (46.5 to 52.8)        | 18.8 (16.3 to 21.6)                 |
| 24 months or greater             | -1.74 (-1.79 to -1.69)    | 41.5 (39.6 to 43.5)        | 13.0 (11.6 to 14.5)                 |
| No preceding interval            | -1.46 (-1.51 to -1.41)    | 30.5 (28.5 to 32.7)        | 7.9 (6.8 to 9.2)                    |
| <b>Birth order*</b>              | -0.11 (-0.12 to -0.10)    | 1.20 (1.17 to 1.23)        | 1.18 (1.14 to 1.21)                 |

\* Birth order (continuous value) presented as bivariate regression coefficients and 95% CI. HAZ, height-for-age z-score; CI, confidence interval. Estimates account for sampling design.

**Table 3: Coefficient estimates and 95% CI from linear regression models relating to contraceptive use and HAZ (n=11,501)**

|                                  | <b>Model 1A</b>           | <b>Model 1B</b>           | <b>Model 1C</b>           | <b>Model 1D</b>              |
|----------------------------------|---------------------------|---------------------------|---------------------------|------------------------------|
| <b>Current contraceptive use</b> | ***                       | ***                       | ***                       | ***                          |
| No use                           | (Reference)               | (Reference)               | (Reference)               | (Reference)                  |
| Traditional                      | 0.12**<br>(0.04 to 0.20)  | 0.11**<br>(0.03 to 0.19)  | 0.12**<br>(0.04 to 0.19)  | 0.12**<br>(0.04 to 0.19)     |
| Modern, any duration             | 0.10***<br>(0.05 to 0.16) | 0.10***<br>(0.05 to 0.16) | N/A                       | N/A                          |
| Modern, <15 months               | N/A                       | N/A                       | 0.02<br>(-0.05 to 0.08)   | 0.02<br>(-0.04 to 0.09)      |
| Modern, ≥15 months               | N/A                       | N/A                       | 0.20***<br>(0.13 to 0.26) | 0.21***<br>(0.15 to 0.28)    |
| <b>Prior contraceptive use</b>   |                           | ***                       | ***                       | ***                          |
| No use                           |                           | (Reference)               | (Reference)               | (Reference)                  |
| Traditional                      |                           | 0.09*<br>(0.02 to 0.17)   | 0.11**<br>(0.03 to 0.18)  | 0.11**<br>(0.04 to 0.19)     |
| Modern                           |                           | 0.10***<br>(0.04 to 0.15) | 0.11***<br>(0.06 to 0.17) | 0.12***<br>(0.07 to 0.18)    |
| <b>Birth interval</b>            |                           |                           |                           | ***                          |
| No preceding interval            |                           |                           |                           | (Reference)                  |
| Less than 24 months              |                           |                           |                           | -0.18***<br>(-0.26 to -0.10) |
| 24 months or greater             |                           |                           |                           | -0.11***<br>(-0.17 to -0.05) |
| <b>Birth order</b>               |                           |                           |                           | -0.04***<br>(-0.06 to -0.02) |

CI, confidence interval; N/A, not applicable. \*  $p < 0.05$ , \*\*  $p < 0.01$ , \*\*\*  $p < 0.001$ . Asterisks not associated with estimates reflect the overall p-value of the variable. The same pre-specified confounding variables were included in all models: age of child, age of mother, wealth index, child sex, area of residence, maternal and partner education attainment, maternal literacy, maternal marital status, region of country, ethnic group, language, and presence of diarrhea in the last two weeks. Estimates account for sampling design.

**Table 4: Prevalence ratios of stunting and severe stunting estimated from multivariable Poisson regression models using contraceptive use**

|                                  | <b>Prevalence ratio of stunting (95% CI)</b> | <b>Prevalence ratio of severe stunting (95% CI)</b> |
|----------------------------------|----------------------------------------------|-----------------------------------------------------|
| <b>Current contraceptive use</b> | *                                            | ***                                                 |
| No use                           | (Reference)                                  | (Reference)                                         |
| Traditional method               | 0.93<br>(0.86 to 1.02)                       | 0.84<br>(0.69 to 1.03)                              |
| Modern method, <15 months        | 1.01<br>(0.94 to 1.10)                       | 0.93<br>(0.79 to 1.09)                              |
| Modern method, ≥15 months        | 0.87***<br>(0.81 to 0.94)                    | 0.61***<br>(0.50 to 0.73)                           |
| <b>Prior contraceptive use</b>   | **                                           | ***                                                 |
| No use                           | (Reference)                                  | (Reference)                                         |
| Traditional method               | 0.89*<br>(0.81 to 0.98)                      | 0.71**<br>(0.59 to 0.87)                            |
| Modern method                    | 0.93*<br>(0.87 to 0.98)                      | 0.79**<br>(0.69 to 0.92)                            |

CI, confidence interval. \*  $p < 0.05$ , \*\*  $p < 0.01$ , \*\*\*  $p < 0.001$ . Asterisks not associated with estimates reflect the overall p-value of the variable. The same pre-specified confounding variables were included in all models: age of child, age of mother, wealth index, child sex, area of residence, maternal and partner education attainment, maternal literacy, maternal marital status, region of country, ethnic group, language, and presence of diarrhea in the last two weeks. Estimates account for sampling design.

1  
2  
3 **Supplementary File 1: Full results of models**  
4

5 Page 1: Current contraceptive use (Model 1A)  
6

7  
8 Page 2: Adding prior contraceptive use to Model 1A (Model 1B)  
9

10 Page 3: Adding duration of current contraceptive use to Model 1B (Model 1C)  
11

12 Page 4: Adding proxy variables of contraception of birth interval and birth order to  
13 Model 1C (Model 1D)  
14

15  
16 Page 6: Multivariable Poisson regression model for stunting (Model 2A)  
17

18 Page 7: Multivariable Poisson regression model for severe stunting (Model 2B)  
19  
20  
21  
22  
23  
24  
25  
26  
27  
28  
29  
30  
31  
32  
33  
34  
35  
36  
37  
38  
39  
40  
41  
42  
43  
44  
45  
46  
47  
48  
49  
50  
51  
52  
53  
54  
55  
56  
57  
58  
59  
60

Model 1A:

| HAZ                    | Coef.     | Linearized<br>Std. Err. | t      | P> t  | [95% Conf. Interval] |
|------------------------|-----------|-------------------------|--------|-------|----------------------|
| Current method         |           |                         |        |       |                      |
| None or folkloric      | 0         | (base)                  |        |       |                      |
| Traditional            | .1211671  | .0388904                | 3.12   | 0.002 | .0448294 .1975049    |
| Modern                 | .1044309  | .0271529                | 3.85   | 0.000 | .0511326 .1577291    |
| Child sex              |           |                         |        |       |                      |
| Male                   | -.0155443 | .0202571                | -0.77  | 0.443 | -.0553067 .0242182   |
| Child age: Spline 1    | -.106146  | .0048012                | -22.11 | 0.000 | -.1155703 -.0967217  |
| Child age: Spline 2    | .4893727  | .0276793                | 17.68  | 0.000 | .4350412 .5437043    |
| Child age: Spline 3    | -1.274893 | .0825057                | -15.45 | 0.000 | -1.436843 -1.112943  |
| Child age: Spline 4    | 1.202289  | .1042562                | 11.53  | 0.000 | .9976451 1.406933    |
| Mother age: Spline 1   | .0017027  | .0109052                | 0.16   | 0.876 | -.0197031 .0231084   |
| Mother age: Spline 2   | .0085074  | .0871711                | 0.10   | 0.922 | -.1626001 .179615    |
| Mother age: Spline 3   | -.0656902 | .3048907                | -0.22  | 0.829 | -.6641582 .5327777   |
| Mother age: Spline 4   | .1177456  | .3492799                | 0.34   | 0.736 | -.5678537 .8033449   |
| Maternal education     |           |                         |        |       |                      |
| No education           | 0         | (base)                  |        |       |                      |
| Incomplete primary     | .0367643  | .047059                 | 0.78   | 0.435 | -.0556075 .129136    |
| Complete primary       | .1440098  | .0530075                | 2.72   | 0.007 | .0399617 .2480579    |
| Incomplete secondary   | .1944541  | .0568369                | 3.42   | 0.001 | .0828893 .306019     |
| Complete secondary     | .1658597  | .0664803                | 2.49   | 0.013 | .0353661 .2963534    |
| Higher                 | .0353242  | .0909657                | 0.39   | 0.698 | -.1432318 .2138802   |
| Paternal education     |           |                         |        |       |                      |
| No education           | 0         | (base)                  |        |       |                      |
| Incomplete primary     | .0662492  | .0407716                | 1.62   | 0.105 | -.0137811 .1462796   |
| Complete primary       | .1606222  | .0450818                | 3.56   | 0.000 | .0721315 .249113     |
| Incomplete secondary   | .2186094  | .048891                 | 4.47   | 0.000 | .1226417 .3145772    |
| Complete secondary     | .2883964  | .0604127                | 4.77   | 0.000 | .1698128 .4069801    |
| Higher                 | .3721726  | .0796786                | 4.67   | 0.000 | .2157719 .5285733    |
| Missing                | .2141107  | .2224335                | 0.96   | 0.336 | -.2225024 .6507239   |
| Wealth index: Spline 1 | 3.43e-06  | 1.35e-06                | 2.54   | 0.011 | 7.82e-07 6.07e-06    |
| Wealth index: Spline 2 | 9.86e-06  | .0000173                | 0.57   | 0.568 | -.000024 .0000437    |
| Wealth index: Spline 3 | -.0000282 | .0000404                | -0.70  | 0.486 | -.0001075 .0000511   |
| Wealth index: Spline 4 | .0000271  | .0000326                | 0.83   | 0.406 | -.0000368 .000091    |
| Maternal Literacy      |           |                         |        |       |                      |
| Not literate           | 0         | (base)                  |        |       |                      |
| Semi-literate          | .1331506  | .0494539                | 2.69   | 0.007 | .0360778 .2302234    |
| Literate               | .0744441  | .0479646                | 1.55   | 0.121 | -.0197054 .1685936   |
| Region                 |           |                         |        |       |                      |
| metropolitana          | 0         | (base)                  |        |       |                      |
| norte                  | .2640545  | .0800842                | 3.30   | 0.001 | .1068577 .4212512    |
| nororient              | .0592136  | .0661443                | 0.90   | 0.371 | -.0706206 .1890479   |
| surorient              | -.0541307 | .0559854                | -0.97  | 0.334 | -.164024 .0557626    |
| central                | -.0962306 | .0505558                | -1.90  | 0.057 | -.1954662 .0030049   |
| suroccidente           | -.1789787 | .0446085                | -4.01  | 0.000 | -.2665404 -.0914171  |
| noroccidente           | -.2629405 | .061064                 | -4.31  | 0.000 | -.3828027 -.1430784  |
| petEn                  | .4091089  | .0575714                | 7.11   | 0.000 | .2961025 .5221154    |
| Rural or urban         |           |                         |        |       |                      |
| urban                  | 0         | (base)                  |        |       |                      |
| rural                  | .046483   | .0338391                | 1.37   | 0.170 | -.0199396 .1129056   |
| Ethnicity              |           |                         |        |       |                      |
| Indigenous             | -.1902424 | .0330231                | -5.76  | 0.000 | -.2550632 -.1254215  |

|                       |           |          |       |       |           |           |  |
|-----------------------|-----------|----------|-------|-------|-----------|-----------|--|
| Marital status        |           |          |       |       |           |           |  |
| Never in union        | 0         | (base)   |       |       |           |           |  |
| Current partner       | -.0727036 | .2283634 | -0.32 | 0.750 | -.5209565 | .3755493  |  |
| Formerly had partner  | .0728528  | .2230525 | 0.33  | 0.744 | -.3649755 | .5106811  |  |
| Diarrhea              |           |          |       |       |           |           |  |
| Diarrhea last 2 weeks | .0617092  | .0296525 | 2.08  | 0.038 | .0035045  | .1199139  |  |
| language              |           |          |       |       |           |           |  |
| Indigenous language   | -.2098944 | .0467888 | -4.49 | 0.000 | -.3017359 | -.1180529 |  |
| _cons                 | -.7253478 | .3697329 | -1.96 | 0.050 | -1.451094 | .0003984  |  |

Model 1B:

| HAZ                    | Coef.     | Linearized Std. Err. | t      | P> t  | [95% Conf. Interval] |
|------------------------|-----------|----------------------|--------|-------|----------------------|
| Current method         |           |                      |        |       |                      |
| None or folkloric      | 0         | (base)               |        |       |                      |
| Traditional            | .1103493  | .0389104             | 2.84   | 0.005 | .0339724 .1867262    |
| Modern                 | .1015471  | .027303              | 3.72   | 0.000 | .0479541 .15514      |
| Method prior           |           |                      |        |       |                      |
| None or folkloric      | 0         | (base)               |        |       |                      |
| Traditional            | .0922166  | .0389465             | 2.37   | 0.018 | .0157689 .1686643    |
| Modern                 | .0954721  | .0268876             | 3.55   | 0.000 | .0426946 .1482495    |
| Child sex              |           |                      |        |       |                      |
| Male                   | -.0152405 | .0201744             | -0.76  | 0.450 | -.0548407 .0243596   |
| Child age: Spline 1    | -.1054394 | .0047732             | -22.09 | 0.000 | -.1148086 -.0960702  |
| Child age: Spline 2    | .4847697  | .0275748             | 17.58  | 0.000 | .4306433 .5388961    |
| Child age: Spline 3    | -1.261863 | .0822797             | -15.34 | 0.000 | -1.423369 -1.100356  |
| Child age: Spline 4    | 1.190734  | .1041271             | 11.44  | 0.000 | .9863437 1.395124    |
| Mother age: Spline 1   | -.0028259 | .0109626             | -0.26  | 0.797 | -.0243443 .0186924   |
| Mother age: Spline 2   | .0188868  | .0870796             | 0.22   | 0.828 | -.1520412 .1898148   |
| Mother age: Spline 3   | -.0780209 | .3045816             | -0.26  | 0.798 | -.6758821 .5198402   |
| Mother age: Spline 4   | .1117886  | .3492652             | 0.32   | 0.749 | -.5737819 .797359    |
| Maternal education     |           |                      |        |       |                      |
| No education           | 0         | (base)               |        |       |                      |
| Incomplete primary     | .0350125  | .0470799             | 0.74   | 0.457 | -.0574002 .1274252   |
| Complete primary       | .1415199  | .0530149             | 2.67   | 0.008 | .0374573 .2455825    |
| Incomplete secondary   | .191268   | .0564561             | 3.39   | 0.001 | .0804507 .3020853    |
| Complete secondary     | .1648404  | .0668087             | 2.47   | 0.014 | .0337021 .2959787    |
| Higher                 | .036343   | .0906348             | 0.40   | 0.689 | -.1415635 .2142495   |
| Paternal education     |           |                      |        |       |                      |
| No education           | 0         | (base)               |        |       |                      |
| Incomplete primary     | .0644083  | .0405075             | 1.59   | 0.112 | -.0151037 .1439202   |
| Complete primary       | .1591843  | .0449085             | 3.54   | 0.000 | .0710337 .247335     |
| Incomplete secondary   | .2163043  | .0485848             | 4.45   | 0.000 | .1209374 .3116711    |
| Complete secondary     | .2892365  | .0603871             | 4.79   | 0.000 | .1707032 .4077699    |
| Higher                 | .3740162  | .0793104             | 4.72   | 0.000 | .2183383 .5296941    |
| Missing                | .2272545  | .2190948             | 1.04   | 0.300 | -.2028052 .6573142   |
| Wealth index: Spline 1 | 3.30e-06  | 1.34e-06             | 2.46   | 0.014 | 6.66e-07 5.93e-06    |
| Wealth index: Spline 2 | .0000103  | .0000172             | 0.60   | 0.547 | -.0000234 .000044    |
| Wealth index: Spline 3 | -.0000287 | .0000402             | -0.71  | 0.475 | -.0001077 .0000503   |
| Wealth index: Spline 4 | .0000268  | .0000325             | 0.82   | 0.410 | -.000037 .0000905    |

1  
2  
3  
4  
5  
6  
7  
8  
9  
10  
11  
12  
13  
14  
15  
16  
17  
18  
19  
20  
21  
22  
23  
24  
25  
26  
27  
28  
29  
30  
31  
32  
33  
34  
35  
36  
37  
38  
39  
40  
41  
42  
43  
44  
45  
46  
47  
48  
49  
50  
51  
52  
53  
54  
55  
56  
57  
58  
59  
60

|                       |           |          |       |       |           |           |  |
|-----------------------|-----------|----------|-------|-------|-----------|-----------|--|
| Maternal Literacy     |           |          |       |       |           |           |  |
| Not literate          | 0         | (base)   |       |       |           |           |  |
| Semi-literate         | .1311569  | .0496269 | 2.64  | 0.008 | .0337447  | .2285692  |  |
| Literate              | .0693309  | .0477956 | 1.45  | 0.147 | -.0244868 | .1631485  |  |
| Region                |           |          |       |       |           |           |  |
| metropolitana         | 0         | (base)   |       |       |           |           |  |
| norte                 | .2525059  | .0799788 | 3.16  | 0.002 | .095516   | .4094958  |  |
| nororiental           | .0525636  | .0658498 | 0.80  | 0.425 | -.0766925 | .1818197  |  |
| suroriental           | -.0615479 | .0560928 | -1.10 | 0.273 | -.171652  | .0485563  |  |
| central               | -.1015673 | .0505702 | -2.01 | 0.045 | -.2008312 | -.0023035 |  |
| suroccidental         | -.1839533 | .0447326 | -4.11 | 0.000 | -.2717586 | -.096148  |  |
| noroccidental         | -.2680866 | .0611569 | -4.38 | 0.000 | -.388131  | -.1480422 |  |
| peten                 | .3951212  | .057324  | 6.89  | 0.000 | .2826003  | .507642   |  |
| Rural or urban        |           |          |       |       |           |           |  |
| urban                 | 0         | (base)   |       |       |           |           |  |
| rural                 | .0509141  | .0339828 | 1.50  | 0.134 | -.0157904 | .1176187  |  |
| Ethnicity             |           |          |       |       |           |           |  |
| Indigenous            | -.1821777 | .0327233 | -5.57 | 0.000 | -.24641   | -.1179453 |  |
| Marital status        |           |          |       |       |           |           |  |
| Never in union        | 0         | (base)   |       |       |           |           |  |
| Current partner       | -.07856   | .224884  | -0.35 | 0.727 | -.5199833 | .3628632  |  |
| Formerly had partner  | .0686949  | .2194465 | 0.31  | 0.754 | -.3620551 | .499445   |  |
| Diarrhea              |           |          |       |       |           |           |  |
| Diarrhea last 2 weeks | .0596247  | .0297158 | 2.01  | 0.045 | .0012959  | .1179536  |  |
| language              |           |          |       |       |           |           |  |
| Indigenous language   | -.2025057 | .0464782 | -4.36 | 0.000 | -.2937375 | -.1112739 |  |
| _cons                 | -.6796019 | .3684975 | -1.84 | 0.066 | -1.402923 | .0437194  |  |

## Model 1C

| HAZ                     | Coef.     | Linearized Std. Err. | t      | P> t  | [95% Conf. Interval] |
|-------------------------|-----------|----------------------|--------|-------|----------------------|
| Current method duration |           |                      |        |       |                      |
| None or folkloric       | 0         | (base)               |        |       |                      |
| Traditional             | .1163098  | .0387077             | 3.00   | 0.003 | .0403308 .1922889    |
| Modern, <15 months      | .0179315  | .0329476             | 0.54   | 0.586 | -.0467412 .0826042   |
| Modern, 15+ months      | .1982897  | .0322742             | 6.14   | 0.000 | .1349389 .2616405    |
| Method prior            |           |                      |        |       |                      |
| None or folkloric       | 0         | (base)               |        |       |                      |
| Traditional             | .1074334  | .0389791             | 2.76   | 0.006 | .0309217 .1839452    |
| Modern                  | .1134376  | .0269662             | 4.21   | 0.000 | .0605058 .1663695    |
| Child sex               |           |                      |        |       |                      |
| Male                    | -.0150201 | .020208              | -0.74  | 0.458 | -.0546862 .024646    |
| Child age: Spline 1     | -.1056312 | .0047423             | -22.27 | 0.000 | -.1149399 -.0963225  |
| Child age: Spline 2     | .4712375  | .0272155             | 17.32  | 0.000 | .4178163 .5246587    |
| Child age: Spline 3     | -1.215065 | .0813606             | -14.93 | 0.000 | -1.374767 -.055362   |
| Child age: Spline 4     | 1.131548  | .1036733             | 10.91  | 0.000 | .9280486 1.335048    |
| Mother age: Spline 1    | -.0024754 | .0108667             | -0.23  | 0.820 | -.0238055 .0188547   |
| Mother age: Spline 2    | .0065996  | .0865527             | 0.08   | 0.939 | -.1632942 .1764933   |
| Mother age: Spline 3    | -.0380759 | .3034389             | -0.13  | 0.900 | -.6336942 .5575424   |
| Mother age: Spline 4    | .0745868  | .3486809             | 0.21   | 0.831 | -.6098366 .7590102   |



1  
2  
3  
4  
5  
6  
7  
8  
9  
10  
11  
12  
13  
14  
15  
16  
17  
18  
19  
20  
21  
22  
23  
24  
25  
26  
27  
28  
29  
30  
31  
32  
33  
34  
35  
36  
37  
38  
39  
40  
41  
42  
43  
44  
45  
46  
47  
48  
49  
50  
51  
52  
53  
54  
55  
56  
57  
58  
59  
60

|                    |                        |           |          |       |       |           |           |
|--------------------|------------------------|-----------|----------|-------|-------|-----------|-----------|
| Maternal education |                        |           |          |       |       |           |           |
|                    | No education           | 0         | (base)   |       |       |           |           |
|                    | Incomplete primary     | .0356453  | .0472893 | 0.75  | 0.451 | -.0571785 | .1284691  |
|                    | Complete primary       | .1432782  | .0533829 | 2.68  | 0.007 | .0384933  | .2480631  |
|                    | Incomplete secondary   | .1971216  | .0565086 | 3.49  | 0.001 | .0862013  | .308042   |
|                    | Complete secondary     | .1732884  | .0673791 | 2.57  | 0.010 | .0410304  | .3055465  |
|                    | Higher                 | .0488132  | .0903492 | 0.54  | 0.589 | -.1285326 | .226159   |
| Paternal education |                        |           |          |       |       |           |           |
|                    | No education           | 0         | (base)   |       |       |           |           |
|                    | Incomplete primary     | .0635725  | .0406598 | 1.56  | 0.118 | -.0162384 | .1433835  |
|                    | Complete primary       | .1569125  | .0449145 | 3.49  | 0.001 | .0687502  | .2450748  |
|                    | Incomplete secondary   | .2140789  | .0484619 | 4.42  | 0.000 | .1189533  | .3092045  |
|                    | Complete secondary     | .2817726  | .0600371 | 4.69  | 0.000 | .1639262  | .3996191  |
|                    | Higher                 | .370392   | .0784557 | 4.72  | 0.000 | .2163918  | .5243922  |
|                    | Missing                | .2366697  | .2168101 | 1.09  | 0.275 | -.1889054 | .6622448  |
|                    | Wealth index: Spline 1 | 3.31e-06  | 1.34e-06 | 2.48  | 0.013 | 6.89e-07  | 5.93e-06  |
|                    | Wealth index: Spline 2 | 9.12e-06  | .0000171 | 0.53  | 0.595 | -.0000245 | .0000428  |
|                    | Wealth index: Spline 3 | -.0000255 | .0000402 | -0.64 | 0.525 | -.0001043 | .0000533  |
|                    | Wealth index: Spline 4 | .0000238  | .0000324 | 0.73  | 0.463 | -.0000397 | .0000873  |
| Maternal Literacy  |                        |           |          |       |       |           |           |
|                    | Not literate           | 0         | (base)   |       |       |           |           |
|                    | Semi-literate          | .1294599  | .0498202 | 2.60  | 0.010 | .0316682  | .2272516  |
|                    | Literate               | .0634793  | .0478016 | 1.33  | 0.185 | -.0303502 | .1573087  |
| Region             |                        |           |          |       |       |           |           |
|                    | metropolitana          | 0         | (base)   |       |       |           |           |
|                    | norte                  | .251501   | .0804394 | 3.13  | 0.002 | .093607   | .409395   |
|                    | nororient              | .0512248  | .0656366 | 0.78  | 0.435 | -.0776128 | .1800624  |
|                    | surorient              | -.0598625 | .0560991 | -1.07 | 0.286 | -.1699791 | .0502541  |
|                    | central                | -.096976  | .0506262 | -1.92 | 0.056 | -.1963498 | .0023978  |
|                    | suroccidente           | -.18133   | .0447297 | -4.05 | 0.000 | -.2691297 | -.0935304 |
|                    | noroccidente           | -.2668419 | .0611087 | -4.37 | 0.000 | -.3867919 | -.146892  |
|                    | pet n                  | .3888047  | .0577036 | 6.74  | 0.000 | .2755386  | .5020707  |
| Rural or urban     |                        |           |          |       |       |           |           |
|                    | urban                  | 0         | (base)   |       |       |           |           |
|                    | rural                  | .0492273  | .0341321 | 1.44  | 0.150 | -.0177704 | .116225   |
| Ethnicity          |                        |           |          |       |       |           |           |
|                    | Indigenous             | -.1805182 | .0326311 | -5.53 | 0.000 | -.2445695 | -.1164668 |
| Marital status     |                        |           |          |       |       |           |           |
|                    | Never in union         | 0         | (base)   |       |       |           |           |
|                    | Current partner        | -.0676426 | .2227174 | -0.30 | 0.761 | -.5048132 | .369528   |
|                    | Formerly had partner   | .0813559  | .2173025 | 0.37  | 0.708 | -.3451858 | .5078976  |
| Diarrhea           |                        |           |          |       |       |           |           |
|                    | Diarrhea last 2 weeks  | .0559771  | .0298013 | 1.88  | 0.061 | -.0025198 | .1144739  |
| language           |                        |           |          |       |       |           |           |
|                    | Indigenous language    | -.2005675 | .0461466 | -4.35 | 0.000 | -.2911483 | -.1099867 |
|                    | _cons                  | -.6566571 | .366243  | -1.79 | 0.073 | -1.375553 | .0622388  |

Model 1D:

| HAZ                     | Coef. | Linearized Std. Err. | t | P> t | [95% Conf. Interval] |
|-------------------------|-------|----------------------|---|------|----------------------|
| Current method duration |       |                      |   |      |                      |

|    |                        |           |          |        |       |           |           |
|----|------------------------|-----------|----------|--------|-------|-----------|-----------|
| 1  |                        |           |          |        |       |           |           |
| 2  |                        |           |          |        |       |           |           |
| 3  | None or folkloric      | 0         | (base)   |        |       |           |           |
| 4  | Traditional            | .1166987  | .0389429 | 3.00   | 0.003 | .0402579  | .1931394  |
| 5  | Modern, <15 months     | .0225894  | .0329246 | 0.69   | 0.493 | -.0420381 | .087217   |
| 6  | Modern, 15+ months     | .2136212  | .0318983 | 6.70   | 0.000 | .1510082  | .2762341  |
| 7  | Method prior           |           |          |        |       |           |           |
| 8  | None or folkloric      | 0         | (base)   |        |       |           |           |
| 9  | Traditional            | .1135981  | .0383521 | 2.96   | 0.003 | .0383171  | .1888792  |
| 10 | Modern                 | .1223868  | .0268274 | 4.56   | 0.000 | .0697276  | .1750461  |
| 11 | birth_order_number     | -.0371225 | .0091092 | -4.08  | 0.000 | -.0550029 | -.019242  |
| 12 |                        |           |          |        |       |           |           |
| 13 | ant_birth_interval_cat |           |          |        |       |           |           |
| 14 | <24 months             | -.1795951 | .0400326 | -4.49  | 0.000 | -.2581748 | -.1010154 |
| 15 | >= 24 months           | -.1113712 | .0314998 | -3.54  | 0.000 | -.1732019 | -.0495404 |
| 16 | No preceding birth     | 0         | (base)   |        |       |           |           |
| 17 | Child sex              |           |          |        |       |           |           |
| 18 | Male                   | -.0175694 | .0200552 | -0.88  | 0.381 | -.0569356 | .0217968  |
| 19 | Child age: Spline 1    | -.1070204 | .0047895 | -22.34 | 0.000 | -.1164217 | -.0976191 |
| 20 | Child age: Spline 2    | .4723683  | .0273577 | 17.27  | 0.000 | .418668   | .5260687  |
| 21 | Child age: Spline 3    | -1.217166 | .0816164 | -14.91 | 0.000 | -1.37737  | -1.056962 |
| 22 | Child age: Spline 4    | 1.131767  | .1035916 | 10.93  | 0.000 | .9284278  | 1.335106  |
| 23 | Mother age: Spline 1   | .0133682  | .011393  | 1.17   | 0.241 | -.0089951 | .0357315  |
| 24 | Mother age: Spline 2   | .0009846  | .0869334 | 0.01   | 0.991 | -.1696565 | .1716257  |
| 25 | Mother age: Spline 3   | -.0465822 | .3040882 | -0.15  | 0.878 | -.6434749 | .5503105  |
| 26 | Mother age: Spline 4   | .1092713  | .3495462 | 0.31   | 0.755 | -.5768507 | .7953933  |
| 27 | Maternal education     |           |          |        |       |           |           |
| 28 | No education           | 0         | (base)   |        |       |           |           |
| 29 | Incomplete primary     | .0305441  | .0469836 | 0.65   | 0.516 | -.0616797 | .1227679  |
| 30 | Complete primary       | .1238691  | .0534981 | 2.32   | 0.021 | .018858   | .2288801  |
| 31 | Incomplete secondary   | .1638845  | .056268  | 2.95   | 0.003 | .054695   | .2730739  |
| 32 | Complete secondary     | .1173887  | .0674048 | 1.74   | 0.082 | -.0149198 | .2496972  |
| 33 | Higher                 | -.0307197 | .0894726 | -0.34  | 0.731 | -.2063448 | .1449054  |
| 34 | Paternal education     |           |          |        |       |           |           |
| 35 | No education           | 0         | (base)   |        |       |           |           |
| 36 | Incomplete primary     | .0579351  | .040595  | 1.43   | 0.154 | -.0217486 | .1376187  |
| 37 | Complete primary       | .1398775  | .0448697 | 3.12   | 0.002 | .051803   | .2279519  |
| 38 | Incomplete secondary   | .1893224  | .0483602 | 3.91   | 0.000 | .0943964  | .2842484  |
| 39 | Complete secondary     | .2550182  | .0604863 | 4.22   | 0.000 | .1362901  | .3737464  |
| 40 | Higher                 | .3408014  | .078709  | 4.33   | 0.000 | .1863039  | .4952988  |
| 41 | Missing                | .2158817  | .2185283 | 0.99   | 0.324 | -.2130661 | .6448295  |
| 42 | Wealth index: Spline 1 | 3.29e-06  | 1.33e-06 | 2.47   | 0.014 | 6.75e-07  | 5.90e-06  |
| 43 | Wealth index: Spline 2 | 7.05e-06  | .0000171 | 0.41   | 0.680 | -.0000265 | .0000406  |
| 44 | Wealth index: Spline 3 | -.0000209 | .00004   | -0.52  | 0.600 | -.0000994 | .0000575  |
| 45 | Wealth index: Spline 4 | .0000208  | .0000322 | 0.65   | 0.517 | -.0000423 | .000084   |
| 46 | Maternal Literacy      |           |          |        |       |           |           |
| 47 | Not literate           | 0         | (base)   |        |       |           |           |
| 48 | Semi-literate          | .1168495  | .0506464 | 2.31   | 0.021 | .0174361  | .2162629  |
| 49 | Literate               | .0476243  | .0482118 | 0.99   | 0.324 | -.0470104 | .142259   |
| 50 | Region                 |           |          |        |       |           |           |
| 51 | metropolitana          | 0         | (base)   |        |       |           |           |
| 52 | norte                  | .246735   | .0809016 | 3.05   | 0.002 | .0879338  | .4055362  |
| 53 | nororient              | .0564199  | .0660488 | 0.85   | 0.393 | -.0732269 | .1860668  |
| 54 | surorient              | -.0640409 | .0558115 | -1.15  | 0.252 | -.1735929 | .0455112  |
| 55 | central                | -.0971845 | .0510282 | -1.90  | 0.057 | -.1973474 | .0029784  |
| 56 | suroccidente           | -.1827254 | .0448307 | -4.08  | 0.000 | -.2707233 | -.0947275 |
| 57 | noroccidente           | -.2653872 | .0620476 | -4.28  | 0.000 | -.3871799 | -.1435944 |
| 58 | pet n                  | .3930161  | .0578208 | 6.80   | 0.000 | .2795201  | .5065121  |

|                       |           |          |       |       |           |           |  |
|-----------------------|-----------|----------|-------|-------|-----------|-----------|--|
| Rural or urban        |           |          |       |       |           |           |  |
| urban                 | 0         | (base)   |       |       |           |           |  |
| rural                 | .0482019  | .0341772 | 1.41  | 0.159 | -.0188843 | .1152882  |  |
| Ethnicity             |           |          |       |       |           |           |  |
| Indigenous            | -.1769919 | .0324946 | -5.45 | 0.000 | -.2407754 | -.1132084 |  |
| Marital status        |           |          |       |       |           |           |  |
| Never in union        | 0         | (base)   |       |       |           |           |  |
| Current partner       | -.0205614 | .2252452 | -0.09 | 0.927 | -.4626937 | .421571   |  |
| Formerly had partner  | .1149221  | .2199739 | 0.52  | 0.602 | -.3168632 | .5467075  |  |
| Diarrhea last 2 weeks | .0580342  | .0298005 | 1.95  | 0.052 | -.0004611 | .1165295  |  |
| Indigenous language   | -.2057576 | .0458019 | -4.49 | 0.000 | -.2956618 | -.1158534 |  |
| _cons                 | -.8419261 | .3705811 | -2.27 | 0.023 | -1.569337 | -.1145148 |  |

Model 2A

| Stunted                 | IRR      | Linearized Std. Err. | t      | P> t  | [95% Conf. Interval] |          |
|-------------------------|----------|----------------------|--------|-------|----------------------|----------|
| Current method duration |          |                      |        |       |                      |          |
| None or folkloric       | 1        | (base)               |        |       |                      |          |
| Traditional             | .9328999 | .041227              | -1.57  | 0.116 | .8553861             | 1.017438 |
| Modern, <15 months      | 1.012191 | .0415058             | 0.30   | 0.768 | .9339118             | 1.097031 |
| Modern, 15+ months      | .8749756 | .0330205             | -3.54  | 0.000 | .8125024             | .9422523 |
| Method prior            |          |                      |        |       |                      |          |
| None or folkloric       | 1        | (base)               |        |       |                      |          |
| Traditional             | .8898078 | .0427152             | -2.43  | 0.015 | .8097915             | .9777306 |
| Modern                  | .9226536 | .0294662             | -2.52  | 0.012 | .8665902             | .982344  |
| Child sex               |          |                      |        |       |                      |          |
| Male                    | .9981576 | .0240958             | -0.08  | 0.939 | .9519633             | 1.046593 |
| Child age: Spline 1     | 1.147278 | .0092394             | 17.06  | 0.000 | 1.129284             | 1.165558 |
| Child age: Spline 2     | .5583597 | .0212496             | -15.31 | 0.000 | .5181689             | .6016679 |
| Child age: Spline 3     | 4.361083 | .4574102             | 14.04  | 0.000 | 3.54963              | 5.358037 |
| Child age: Spline 4     | .266644  | .0314163             | -11.22 | 0.000 | .2115887             | .3360248 |
| Mother age: Spline 1    | 1.01197  | .0146406             | 0.82   | 0.411 | .9836367             | 1.04112  |
| Mother age: Spline 2    | .9038194 | .0956332             | -0.96  | 0.339 | .7343132             | 1.112454 |
| Mother age: Spline 3    | 1.434583 | .5097398             | 1.02   | 0.310 | .7142041             | 2.881568 |
| Mother age: Spline 4    | .6696236 | .260711              | -1.03  | 0.303 | .311838              | 1.437913 |
| Maternal education      |          |                      |        |       |                      |          |
| No education            | 1        | (base)               |        |       |                      |          |
| Incomplete primary      | .9245653 | .0416069             | -1.74  | 0.082 | .8463985             | 1.009951 |
| Complete primary        | .7764337 | .0488322             | -4.02  | 0.000 | .6862617             | .8784539 |
| Incomplete secondary    | .7121522 | .0549524             | -4.40  | 0.000 | .6120581             | .8286153 |
| Complete secondary      | .797104  | .0832392             | -2.17  | 0.030 | .6493721             | .9784447 |
| Higher                  | .6903204 | .1268405             | -2.02  | 0.044 | .4813001             | .9901146 |
| Paternal education      |          |                      |        |       |                      |          |
| No education            | 1        | (base)               |        |       |                      |          |
| Incomplete primary      | .9582091 | .0297854             | -1.37  | 0.170 | .9014914             | 1.018495 |
| Complete primary        | .9131667 | .0396738             | -2.09  | 0.037 | .8385194             | .9944593 |
| Incomplete secondary    | .8197172 | .0485059             | -3.36  | 0.001 | .7298268             | .920679  |
| Complete secondary      | .6779779 | .0616789             | -4.27  | 0.000 | .5671029             | .8105302 |
| Higher                  | .7128195 | .1124964             | -2.15  | 0.032 | .5229294             | .971664  |

|    |                        |          |          |       |       |          |          |
|----|------------------------|----------|----------|-------|-------|----------|----------|
| 1  |                        |          |          |       |       |          |          |
| 2  |                        |          |          |       |       |          |          |
| 3  | Missing                | 1.063175 | .2147334 | 0.30  | 0.762 | .7151996 | 1.580454 |
| 4  |                        |          |          |       |       |          |          |
| 5  | Wealth index: Spline 1 | .9999979 | 1.00e-06 | -2.07 | 0.039 | .999996  | .9999999 |
| 6  | Wealth index: Spline 2 | .9999877 | .0000164 | -0.75 | 0.456 | .9999555 | 1.00002  |
| 7  | Wealth index: Spline 3 | 1.000023 | .0000419 | 0.56  | 0.578 | .999941  | 1.000106 |
| 8  | Wealth index: Spline 4 | .9999857 | .0000395 | -0.36 | 0.717 | .999908  | 1.000063 |
| 9  |                        |          |          |       |       |          |          |
| 10 | Maternal Literacy      |          |          |       |       |          |          |
| 11 | Not literate           | 1        | (base)   |       |       |          |          |
| 12 | Semi-literate          | .9841694 | .0475299 | -0.33 | 0.741 | .8951589 | 1.082031 |
| 13 | Literate               | 1.050414 | .0512834 | 1.01  | 0.314 | .9544234 | 1.156059 |
| 14 |                        |          |          |       |       |          |          |
| 15 | Region                 |          |          |       |       |          |          |
| 16 | metropolitana          | 1        | (base)   |       |       |          |          |
| 17 | norte                  | .8942517 | .096157  | -1.04 | 0.299 | .7240942 | 1.104395 |
| 18 | nororient              | 1.05239  | .1080992 | 0.50  | 0.619 | .8602258 | 1.287481 |
| 19 | surorient              | 1.169861 | .1083458 | 1.69  | 0.091 | .975401  | 1.40309  |
| 20 | central                | 1.24418  | .1093738 | 2.49  | 0.013 | 1.046993 | 1.478505 |
| 21 | suroccidente           | 1.32017  | .1135557 | 3.23  | 0.001 | 1.115074 | 1.56299  |
| 22 | noroccidente           | 1.301392 | .1221737 | 2.81  | 0.005 | 1.082377 | 1.564723 |
| 23 | petEn                  | .7645364 | .0751074 | -2.73 | 0.006 | .6304518 | .9271381 |
| 24 |                        |          |          |       |       |          |          |
| 25 | Rural or urban         |          |          |       |       |          |          |
| 26 | urban                  | 1        | (base)   |       |       |          |          |
| 27 | rural                  | .944827  | .034907  | -1.54 | 0.125 | .8787338 | 1.015891 |
| 28 |                        |          |          |       |       |          |          |
| 29 | Ethnicity              |          |          |       |       |          |          |
| 30 | Indigenous             | 1.223458 | .0499713 | 4.94  | 0.000 | 1.129198 | 1.325585 |
| 31 |                        |          |          |       |       |          |          |
| 32 | Marital status         |          |          |       |       |          |          |
| 33 | Never in union         | 1        | (base)   |       |       |          |          |
| 34 | Current partner        | 1.414501 | .3011366 | 1.63  | 0.104 | .9313611 | 2.148269 |
| 35 | Formerly had partner   | 1.284493 | .2597571 | 1.24  | 0.216 | .8636542 | 1.910397 |
| 36 |                        |          |          |       |       |          |          |
| 37 | Diarrhea               |          |          |       |       |          |          |
| 38 | Diarrhea last 2 weeks  | .9816709 | .032857  | -0.55 | 0.581 | .919249  | 1.048331 |
| 39 |                        |          |          |       |       |          |          |
| 40 | language               |          |          |       |       |          |          |
| 41 | Indigenous language    | 1.157584 | .0512192 | 3.31  | 0.001 | 1.061288 | 1.262616 |
| 42 | _cons                  | .0497515 | .0196101 | -7.61 | 0.000 | .0229506 | .1078495 |

## Model 2B

| Severe stunted | IRR                     | Linearized Std. Err. | t        | P> t   | [95% Conf. Interval] |          |          |
|----------------|-------------------------|----------------------|----------|--------|----------------------|----------|----------|
| 43             |                         |                      |          |        |                      |          |          |
| 44             | Current method duration |                      |          |        |                      |          |          |
| 45             | None or folkloric       | 1                    | (base)   |        |                      |          |          |
| 46             | Traditional             | .8392504             | .0862571 | -1.71  | 0.089                | .6859231 | 1.026852 |
| 47             | Modern, <15 months      | .9309835             | .0768322 | -0.87  | 0.386                | .7917518 | 1.0947   |
| 48             | Modern, 15+ months      | .6066651             | .0581278 | -5.22  | 0.000                | .5026539 | .7321987 |
| 49             | Method prior            |                      |          |        |                      |          |          |
| 50             | None or folkloric       | 1                    | (base)   |        |                      |          |          |
| 51             | Traditional             | .7137948             | .0706891 | -3.40  | 0.001                | .5876929 | .8669544 |
| 52             | Modern                  | .794928              | .0575065 | -3.17  | 0.002                | .689697  | .9162147 |
| 53             | Child sex               |                      |          |        |                      |          |          |
| 54             | Male                    | 1.005594             | .0556635 | 0.10   | 0.920                | .9020589 | 1.121012 |
| 55             | Child age: Spline 1     | 1.270901             | .0246087 | 12.38  | 0.000                | 1.223504 | 1.320135 |
| 56             | Child age: Spline 2     | .3714861             | .0323475 | -11.37 | 0.000                | .3131213 | .44073   |
| 57             |                         |                      |          |        |                      |          |          |
| 58             |                         |                      |          |        |                      |          |          |
| 59             |                         |                      |          |        |                      |          |          |
| 60             |                         |                      |          |        |                      |          |          |

|    |                        |          |          |       |       |          |          |
|----|------------------------|----------|----------|-------|-------|----------|----------|
| 1  |                        |          |          |       |       |          |          |
| 2  |                        |          |          |       |       |          |          |
| 3  | Child age: Spline 3    | 11.79388 | 2.751101 | 10.58 | 0.000 | 7.461128 | 18.64272 |
| 4  | Child age: Spline 4    | .1167925 | .0296469 | -8.46 | 0.000 | .0709611 | .1922246 |
| 5  | Mother age: Spline 1   | .9839426 | .0329506 | -0.48 | 0.629 | .921344  | 1.050794 |
| 6  | Mother age: Spline 2   | 1.301007 | .3119129 | 1.10  | 0.273 | .8126458 | 2.08285  |
| 7  | Mother age: Spline 3   | .4106408 | .3278755 | -1.11 | 0.265 | .0856655 | 1.968423 |
| 8  | Mother age: Spline 4   | 2.389217 | 2.054046 | 1.01  | 0.311 | .4419477 | 12.91636 |
| 9  | Maternal education     |          |          |       |       |          |          |
| 10 | No education           | 1        | (base)   |       |       |          |          |
| 11 | Incomplete primary     | .9373759 | .0797913 | -0.76 | 0.448 | .7931394 | 1.107843 |
| 12 | Complete primary       | .7122443 | .0954174 | -2.53 | 0.011 | .5475521 | .9264724 |
| 13 | Incomplete secondary   | .6133594 | .101701  | -2.95 | 0.003 | .4429621 | .8493047 |
| 14 | Complete secondary     | .5102681 | .1337213 | -2.57 | 0.010 | .3050693 | .8534899 |
| 15 | Higher                 | .945368  | .394662  | -0.13 | 0.893 | .4166    | 2.145272 |
| 16 | Paternal education     |          |          |       |       |          |          |
| 17 | No education           | 1        | (base)   |       |       |          |          |
| 18 | Incomplete primary     | .9442337 | .068     | -0.80 | 0.426 | .8197617 | 1.087605 |
| 19 | Complete primary       | .8342584 | .0822415 | -1.84 | 0.066 | .6874854 | 1.012366 |
| 20 | Incomplete secondary   | .7443619 | .1001206 | -2.19 | 0.028 | .571639  | .9692736 |
| 21 | Complete secondary     | .8341412 | .1647484 | -0.92 | 0.359 | .5660703 | 1.229161 |
| 22 | Higher                 | .5584609 | .2441698 | -1.33 | 0.183 | .2367418 | 1.317379 |
| 23 | Missing                | .8798822 | .5991978 | -0.19 | 0.851 | .2311489 | 3.349325 |
| 24 | Wealth index: Spline 1 | .9999967 | 2.43e-06 | -1.35 | 0.176 | .999992  | 1.000001 |
| 25 | Wealth index: Spline 2 | .9999832 | .0000372 | -0.45 | 0.652 | .9999102 | 1.000056 |
| 26 | Wealth index: Spline 3 | 1.000015 | .0000971 | 0.15  | 0.880 | .9998241 | 1.000205 |
| 27 | Wealth index: Spline 4 | 1.000019 | .0000968 | 0.20  | 0.841 | .9998294 | 1.000209 |
| 28 | Maternal Literacy      |          |          |       |       |          |          |
| 29 | Not literate           | 1        | (base)   |       |       |          |          |
| 30 | Semi-literate          | .8336295 | .085653  | -1.77 | 0.077 | .6813714 | 1.019911 |
| 31 | Literate               | .9618646 | .0909112 | -0.41 | 0.681 | .7989909 | 1.15794  |
| 32 | Region                 |          |          |       |       |          |          |
| 33 | metropolitana          | 1        | (base)   |       |       |          |          |
| 34 | norte                  | .9415956 | .2559688 | -0.22 | 0.825 | .5522338 | 1.605483 |
| 35 | nororient              | 1.524393 | .4104816 | 1.57  | 0.118 | .8985592 | 2.586111 |
| 36 | surorient              | 1.780875 | .4518732 | 2.27  | 0.023 | 1.082255 | 2.93047  |
| 37 | central                | 1.515512 | .3895433 | 1.62  | 0.106 | .9150436 | 2.510019 |
| 38 | suroccidente           | 1.857053 | .4496952 | 2.56  | 0.011 | 1.154498 | 2.987138 |
| 39 | noroccidente           | 1.873418 | .4713894 | 2.49  | 0.013 | 1.143234 | 3.06997  |
| 40 | petEn                  | .5704913 | .1689922 | -1.89 | 0.058 | .3189535 | 1.020401 |
| 41 | Rural or urban         |          |          |       |       |          |          |
| 42 | urban                  | 1        | (base)   |       |       |          |          |
| 43 | rural                  | 1.076438 | .0987893 | 0.80  | 0.422 | .8989876 | 1.288914 |
| 44 | Ethnicity              |          |          |       |       |          |          |
| 45 | Indigenous             | 1.317971 | .1274795 | 2.85  | 0.004 | 1.090062 | 1.593531 |
| 46 | Marital status         |          |          |       |       |          |          |
| 47 | Never in union         | 1        | (base)   |       |       |          |          |
| 48 | Current partner        | 1.183601 | .851894  | 0.23  | 0.815 | .2881636 | 4.861512 |
| 49 | Formerly had partner   | .8207678 | .5900323 | -0.27 | 0.784 | .2001683 | 3.365467 |
| 50 | Diarrhea               |          |          |       |       |          |          |
| 51 | Diarrhea last 2 weeks  | 1.013406 | .0764558 | 0.18  | 0.860 | .8739149 | 1.175163 |
| 52 | language               |          |          |       |       |          |          |
| 53 | Indigenous language    | 1.228431 | .1295886 | 1.95  | 0.051 | .9986704 | 1.511051 |
| 54 | _cons                  | .0068571 | .0069515 | -4.91 | 0.000 | .0009374 | .0501594 |

**Supplementary File 2: Selected results of sensitivity analysis**

Page 1: Sensitivity analysis 1 (Inclusion of maternal height). Model 1C and the Poisson model for stunting (2A) shown.

Page 3: Sensitivity analysis 2 (Inclusion of health care access variables). Model 1C and the Poisson model for stunting (2A) shown.

Page 9: Sensitivity analysis 3: (Inclusion of feeding indicators). Model 1C and the Poisson model for stunting (2A) shown.

## SENSITIVITY ANALYSIS 1: INCLUSION OF MATERNAL HEIGHT

Model 1C:

| haz                     | Coef.     | Linearized<br>Std. Err. | t      | P> t  | [95% Conf. Interval] |           |
|-------------------------|-----------|-------------------------|--------|-------|----------------------|-----------|
| Method current duration |           |                         |        |       |                      |           |
| None or folkloric       | 0         | (base)                  |        |       |                      |           |
| Traditional             | .0828215  | .0383321                | 2.16   | 0.031 | .0075797             | .1580634  |
| Modern, <15 months      | -.0099689 | .0321823                | -0.31  | 0.757 | -.0731394            | .0532015  |
| Modern, 15+ months      | .1628285  | .0330641                | 4.92   | 0.000 | .0979273             | .2277298  |
| Prior method            |           |                         |        |       |                      |           |
| None or folkloric       | 0         | (base)                  |        |       |                      |           |
| Traditional             | .0808978  | .0386124                | 2.10   | 0.036 | .0051059             | .1566898  |
| Modern                  | .0923037  | .026018                 | 3.55   | 0.000 | .0412331             | .1433743  |
| Maternal height         | .0591105  | .0023173                | 25.51  | 0.000 | .0545619             | .0636592  |
| Child sex               |           |                         |        |       |                      |           |
| male                    | -.0181955 | .0203327                | -0.89  | 0.371 | -.0581063            | .0217154  |
| Child age: Spline 1     | -.1030885 | .0047464                | -21.72 | 0.000 | -.1124052            | -.0937717 |
| Child age: Spline 2     | .4563764  | .0267942                | 17.03  | 0.000 | .4037821             | .5089706  |
| Child age: Spline 3     | -1.176262 | .0795339                | -14.79 | 0.000 | -1.332379            | -1.020146 |
| Child age: Spline 4     | 1.094194  | .1012968                | 10.80  | 0.000 | .8953594             | 1.293029  |
| Mother age: Spline 1    | -.0028331 | .0107914                | -0.26  | 0.793 | -.0240154            | .0183493  |
| Mother age: Spline 2    | -.0031073 | .0860255                | -0.04  | 0.971 | -.1719662            | .1657516  |
| Mother age: Spline 3    | .0308981  | .3005511                | 0.10   | 0.918 | -.5590517            | .6208479  |
| Mother age: Spline 4    | -.0534912 | .3436003                | -0.16  | 0.876 | -.7279419            | .6209595  |
| Maternal education      |           |                         |        |       |                      |           |
| No education            | 0         | (base)                  |        |       |                      |           |
| Incomplete primary      | .0535684  | .0441148                | 1.21   | 0.225 | -.0330244            | .1401611  |
| Complete primary        | .1220872  | .0523067                | 2.33   | 0.020 | .0194148             | .2247597  |
| Incomplete secondary    | .1343054  | .0552716                | 2.43   | 0.015 | .0258131             | .2427977  |
| Complete secondary      | .1243386  | .067072                 | 1.85   | 0.064 | -.0073167            | .2559938  |
| Higher                  | -.0020645 | .090059                 | -0.02  | 0.982 | -.1788406            | .1747117  |
| Paternal education      |           |                         |        |       |                      |           |
| No education            | 0         | (base)                  |        |       |                      |           |
| Incomplete primary      | .0426493  | .0388873                | 1.10   | 0.273 | -.0336823            | .1189809  |
| Complete primary        | .1261663  | .0428735                | 2.94   | 0.003 | .0420102             | .2103224  |
| Incomplete secondary    | .1396516  | .0457162                | 3.05   | 0.002 | .0499154             | .2293877  |
| Complete secondary      | .186344   | .0588145                | 3.17   | 0.002 | .0708974             | .3017906  |
| Higher                  | .2905144  | .07469                  | 3.89   | 0.000 | .1439059             | .4371229  |
| Missing                 | .1928098  | .2556019                | 0.75   | 0.451 | -.3089094            | .6945291  |
| Wealth index: Spline 1  | 3.19e-06  | 1.28e-06                | 2.50   | 0.013 | 6.81e-07             | 5.70e-06  |
| Wealth index: Spline 2  | -2.88e-06 | .0000162                | -0.18  | 0.859 | -.0000346            | .0000289  |
| Wealth index: Spline 3  | 5.97e-06  | .0000378                | 0.16   | 0.874 | -.0000681            | .0000801  |
| Wealth index: Spline 4  | -6.04e-06 | .0000304                | -0.20  | 0.843 | -.0000658            | .0000537  |
| Maternal literacy       |           |                         |        |       |                      |           |
| Not literate            | 0         | (base)                  |        |       |                      |           |
| Semi-literate           | .0555965  | .0480634                | 1.16   | 0.248 | -.0387468            | .1499399  |
| Literate                | -.0055979 | .0458467                | -0.12  | 0.903 | -.0955901            | .0843944  |
| Region                  |           |                         |        |       |                      |           |
| metropolitana           | 0         | (base)                  |        |       |                      |           |
| norte                   | .1536683  | .0683883                | 2.25   | 0.025 | .0194294             | .2879073  |
| nororient               | .0012608  | .0593786                | 0.02   | 0.983 | -.115293             | .1178146  |
| surorient               | -.1415546 | .052056                 | -2.72  | 0.007 | -.243735             | -.0393741 |

|    |                       |           |          |        |       |           |           |
|----|-----------------------|-----------|----------|--------|-------|-----------|-----------|
| 1  |                       |           |          |        |       |           |           |
| 2  |                       |           |          |        |       |           |           |
| 3  | central               | -.0805888 | .0476305 | -1.69  | 0.091 | -.1740825 | .0129049  |
| 4  | suroccidente          | -.1524722 | .0430143 | -3.54  | 0.000 | -.2369048 | -.0680397 |
| 5  | noroccidente          | -.2637109 | .0565273 | -4.67  | 0.000 | -.3746679 | -.1527538 |
| 6  | petEn                 | .261967   | .0525765 | 4.98   | 0.000 | .1587649  | .3651691  |
| 7  | Rural or urban        |           |          |        |       |           |           |
| 8  | urban                 | 0         | (base)   |        |       |           |           |
| 9  | rural                 | .0276319  | .0304003 | 0.91   | 0.364 | -.0320405 | .0873044  |
| 10 | Ethnicity             |           |          |        |       |           |           |
| 11 | Indigenous            | -.0802691 | .0308467 | -2.60  | 0.009 | -.1408178 | -.0197204 |
| 12 | Marital status        |           |          |        |       |           |           |
| 13 | Never in union        | 0         | (base)   |        |       |           |           |
| 14 | Current partner       | -.0447689 | .256917  | -0.17  | 0.862 | -.5490696 | .4595319  |
| 15 | Formerly had partner  | .0743129  | .2540367 | 0.29   | 0.770 | -.424334  | .5729598  |
| 16 | diarrhea              |           |          |        |       |           |           |
| 17 | Diarrhea last 2 weeks | .0441847  | .028702  | 1.54   | 0.124 | -.0121544 | .1005237  |
| 18 | Language              |           |          |        |       |           |           |
| 19 | Indigenous language   | -.1483903 | .0423154 | -3.51  | 0.000 | -.2314509 | -.0653298 |
| 20 | _cons                 | -9.272564 | .525307  | -17.65 | 0.000 | -10.30369 | -8.241443 |

Model 2A:

| haz_sev_stunted         | IRR      | Linearized Std. Err. | t      | P> t  | [95% Conf. Interval] |
|-------------------------|----------|----------------------|--------|-------|----------------------|
| Method current duration |          |                      |        |       |                      |
| None or folkloric       | 1        | (base)               |        |       |                      |
| Traditional             | .847348  | .0913044             | -1.54  | 0.125 | .6858121 1.046932    |
| Modern, <15 months      | .8755858 | .0733789             | -1.59  | 0.113 | .7427741 1.032145    |
| Modern, 15+ months      | .6016019 | .0594584             | -5.14  | 0.000 | .4955144 .7304023    |
| Prior method            |          |                      |        |       |                      |
| None or folkloric       | 1        | (base)               |        |       |                      |
| Traditional             | .7499991 | .0795429             | -2.71  | 0.007 | .6090454 .9235743    |
| Modern                  | .8174482 | .060223              | -2.74  | 0.006 | .7073866 .9446342    |
| Maternal height         | .917066  | .0052369             | -15.16 | 0.000 | .9068438 .9274034    |
| Child sex               |          |                      |        |       |                      |
| male                    | 1.029091 | .061708              | 0.48   | 0.633 | .9148212 1.157634    |
| Child age: Spline 1     | 1.273988 | .0256308             | 12.04  | 0.000 | 1.224658 1.325305    |
| Child age: Spline 2     | .3706372 | .0339715             | -10.83 | 0.000 | .3096091 .4436948    |
| Child age: Spline 3     | 11.78008 | 2.914875             | 9.97   | 0.000 | 7.247881 19.14631    |
| Child age: Spline 4     | .1183067 | .0323553             | -7.80  | 0.000 | .0691622 .2023715    |
| Mother age: Spline 1    | .9809999 | .0344006             | -0.55  | 0.585 | .9157468 1.050903    |
| Mother age: Spline 2    | 1.332721 | .3331131             | 1.15   | 0.251 | .8159507 2.176781    |
| Mother age: Spline 3    | .3793163 | .3161591             | -1.16  | 0.245 | .0738698 1.947763    |
| Mother age: Spline 4    | 2.582762 | 2.326212             | 1.05   | 0.292 | .4408473 15.13145    |
| Maternal education      |          |                      |        |       |                      |
| No education            | 1        | (base)               |        |       |                      |
| Incomplete primary      | .9087908 | .0866642             | -1.00  | 0.316 | .7536509 1.095866    |
| Complete primary        | .7142723 | .1035881             | -2.32  | 0.021 | .5373199 .9494995    |
| Incomplete secondary    | .6679059 | .1168679             | -2.31  | 0.021 | .4737534 .9416256    |
| Complete secondary      | .5842808 | .154255              | -2.04  | 0.042 | .3479857 .9810291    |
| Higher                  | .9858746 | .4278208             | -0.03  | 0.974 | .4206203 2.310751    |



1  
2  
3  
4  
5  
6  
7  
8  
9  
10  
11  
12  
13  
14  
15  
16  
17  
18  
19  
20  
21  
22  
23  
24  
25  
26  
27  
28  
29  
30  
31  
32  
33  
34  
35  
36  
37  
38  
39  
40  
41  
42  
43  
44  
45  
46  
47  
48  
49  
50  
51  
52  
53  
54  
55  
56  
57  
58  
59  
60

|                        |          |          |       |       |          |          |  |
|------------------------|----------|----------|-------|-------|----------|----------|--|
| Paternal education     |          |          |       |       |          |          |  |
| No education           | 1        | (base)   |       |       |          |          |  |
| Incomplete primary     | .9723348 | .0725437 | -0.38 | 0.707 | .839875  | 1.125685 |  |
| Complete primary       | .9165204 | .0947696 | -0.84 | 0.399 | .748161  | 1.122766 |  |
| Incomplete secondary   | .8091604 | .1129314 | -1.52 | 0.130 | .6152592 | 1.06417  |  |
| Complete secondary     | .936959  | .191337  | -0.32 | 0.750 | .6275327 | 1.398958 |  |
| Higher                 | .6079404 | .2760464 | -1.10 | 0.273 | .249333  | 1.482321 |  |
| Missing                | 1.058006 | .5500403 | 0.11  | 0.914 | .3813297 | 2.935456 |  |
| Wealth index: Spline 1 | .9999974 | 2.45e-06 | -1.04 | 0.297 | .9999926 | 1.000002 |  |
| Wealth index: Spline 2 | .999996  | .0000374 | -0.11 | 0.915 | .9999226 | 1.000069 |  |
| Wealth index: Spline 3 | .9999758 | .0000975 | -0.25 | 0.804 | .9997844 | 1.000167 |  |
| Wealth index: Spline 4 | 1.000063 | .0000973 | 0.65  | 0.519 | .9998718 | 1.000254 |  |
| Maternal literacy      |          |          |       |       |          |          |  |
| Not literate           | 1        | (base)   |       |       |          |          |  |
| Semi-literate          | .9205011 | .1023287 | -0.75 | 0.456 | .7400447 | 1.144961 |  |
| Literate               | 1.060289 | .1160898 | 0.53  | 0.593 | .8552399 | 1.3145   |  |
| Region                 |          |          |       |       |          |          |  |
| metropolitana          | 1        | (base)   |       |       |          |          |  |
| norte                  | 1.003565 | .2525018 | 0.01  | 0.989 | .6124335 | 1.644493 |  |
| nororient              | 1.447222 | .3632849 | 1.47  | 0.141 | .8841893 | 2.368782 |  |
| surorient              | 1.635587 | .3854981 | 2.09  | 0.037 | 1.029795 | 2.597746 |  |
| central                | 1.249691 | .3003985 | 0.93  | 0.354 | .7796259 | 2.003174 |  |
| suroccidente           | 1.562954 | .3466153 | 2.01  | 0.044 | 1.011331 | 2.415454 |  |
| noroccidente           | 1.64692  | .3814011 | 2.15  | 0.032 | 1.045329 | 2.59473  |  |
| pet n                  | .5683658 | .1635465 | -1.96 | 0.050 | .3230946 | .99983   |  |
| Rural or urban         |          |          |       |       |          |          |  |
| urban                  | 1        | (base)   |       |       |          |          |  |
| rural                  | 1.092721 | .0911866 | 1.06  | 0.288 | .9276225 | 1.287205 |  |
| Ethnicity              |          |          |       |       |          |          |  |
| Indigenous             | 1.254387 | .1209521 | 2.35  | 0.019 | 1.038086 | 1.515758 |  |
| Marital status         |          |          |       |       |          |          |  |
| Never in union         | 1        | (base)   |       |       |          |          |  |
| Current partner        | 1.428884 | .8119557 | 0.63  | 0.530 | .4683641 | 4.359238 |  |
| Formerly had partner   | .9576589 | .5410263 | -0.08 | 0.939 | .3159429 | 2.902773 |  |
| Diarrhea last 2 weeks  |          |          |       |       |          |          |  |
| diarrhea               | 1.033534 | .0809129 | 0.42  | 0.674 | .8863123 | 1.205211 |  |
| Language               |          |          |       |       |          |          |  |
| Indigenous language    | 1.062018 | .1125    | 0.57  | 0.570 | .862639  | 1.307479 |  |
| _cons                  | 1927.347 | 2445.22  | 5.96  | 0.000 | 159.7454 | 23253.66 |  |

SENSITIVITY ANALYSIS 2: INCLUSION OF HEALTH CARE ACCESS VARIABLES

Model 1C:

| Conf. Interval]         | haz | Coef. | Linearized Std. Err. | t | P> t | [95% |
|-------------------------|-----|-------|----------------------|---|------|------|
| -----                   |     |       |                      |   |      |      |
| Method current duration |     |       |                      |   |      |      |
| None or folkloric       |     |       |                      |   |      |      |
| 0 (base)                |     |       |                      |   |      |      |

|    |           |          |                                       |  |           |          |        |       |           |
|----|-----------|----------|---------------------------------------|--|-----------|----------|--------|-------|-----------|
| 1  |           |          |                                       |  |           |          |        |       |           |
| 2  |           |          |                                       |  |           |          |        |       |           |
| 3  |           |          | Traditional                           |  | .0725817  | .0382755 | 1.90   | 0.058 | -.        |
| 4  | 0025491   | .1477125 |                                       |  |           |          |        |       |           |
| 5  |           |          | Modern, <15 months                    |  | .0190927  | .032698  | 0.58   | 0.559 | -.        |
| 6  | 0450901   | .0832755 |                                       |  |           |          |        |       |           |
| 7  |           |          | Modern, 15+ months                    |  | .1008337  | .0327849 | 3.08   | 0.002 | .         |
| 8  | 0364804   | .165187  |                                       |  |           |          |        |       |           |
| 9  |           |          | Prior method                          |  |           |          |        |       |           |
| 10 |           |          | None or folkloric                     |  | 0         | (base)   |        |       |           |
| 11 |           |          | Traditional                           |  | .1152733  | .0371883 | 3.10   | 0.002 | .         |
| 12 | 0422767   | .1882698 |                                       |  |           |          |        |       |           |
| 13 |           |          | Modern                                |  | .0989718  | .0268963 | 3.68   | 0.000 | .         |
| 14 | 0461771   | .1517664 |                                       |  |           |          |        |       |           |
| 15 |           |          | Place of delivery                     |  |           |          |        |       |           |
| 16 |           |          | respondent's home                     |  | 0         | (base)   |        |       |           |
| 17 |           |          | other home                            |  | .068746   | .0629048 | 1.09   | 0.275 | -.        |
| 18 | 0547295   | .1922214 |                                       |  |           |          |        |       |           |
| 19 |           |          | government hospital                   |  | .2481459  | .0336807 | 7.37   | 0.000 | .         |
| 20 | 1820342   | .3142575 |                                       |  |           |          |        |       |           |
| 21 |           |          | second level (health centers, mate..) |  | .1732056  | .0418517 | 4.14   | 0.000 | .         |
| 22 | 0910552   | .255356  |                                       |  |           |          |        |       |           |
| 23 |           |          | first level (health post, converge..) |  | .3562333  | .2634611 | 1.35   | 0.177 | -.        |
| 24 | 1609129   | .8733794 |                                       |  |           |          |        |       |           |
| 25 |           |          | other public sector                   |  | 1.459564  | .0828591 | 17.62  | 0.000 | 1.29692   |
| 26 | 1.622208  |          |                                       |  |           |          |        |       |           |
| 27 |           |          | private hospital/clinic               |  | .3970499  | .0588869 | 6.74   | 0.000 | .         |
| 28 | 2814612   | .5126387 |                                       |  |           |          |        |       |           |
| 29 |           |          | doctor's office                       |  | .140329   | .3723062 | 0.38   | 0.706 | -.        |
| 30 | 5904684   | .8711264 |                                       |  |           |          |        |       |           |
| 31 |           |          | family protection association (apr..) |  | .7317799  | .1252055 | 5.84   | 0.000 | .         |
| 32 | 4860148   | .9775451 |                                       |  |           |          |        |       |           |
| 33 |           |          | social security (igss)                |  | .3283781  | .0595729 | 5.51   | 0.000 | .         |
| 34 | 2114429   | .4453133 |                                       |  |           |          |        |       |           |
| 35 |           |          | other                                 |  | .1096082  | .1269328 | 0.86   | 0.388 | -.        |
| 36 | 1395474   | .3587639 |                                       |  |           |          |        |       |           |
| 37 |           |          | Antenatal visits                      |  |           |          |        |       |           |
| 38 |           |          | <4 antenatal visits                   |  | 0         | (base)   |        |       |           |
| 39 |           |          | 4+ antenatal visits                   |  | .037495   | .0341487 | 1.10   | 0.273 | -.        |
| 40 | 0295352   | .1045253 |                                       |  |           |          |        |       |           |
| 41 |           |          | Missing data                          |  | -.22444   | .0392897 | -5.71  | 0.000 | -.3015614 |
| 42 | -.1473185 |          |                                       |  |           |          |        |       |           |
| 43 |           |          | Distance problem health               |  |           |          |        |       |           |
| 44 |           |          | no problem                            |  | 0         | (base)   |        |       |           |
| 45 |           |          | big problem                           |  | -.0088258 | .0287711 | -0.31  | 0.759 | -.        |
| 46 | 0653005   | .0476489 |                                       |  |           |          |        |       |           |
| 47 |           |          | Money problem health                  |  |           |          |        |       |           |
| 48 |           |          | no problem                            |  | 0         | (base)   |        |       |           |
| 49 |           |          | big problem                           |  | -.0335589 | .0281148 | -1.19  | 0.233 | -.        |
| 50 | 0887452   | .0216274 |                                       |  |           |          |        |       |           |
| 51 |           |          | Child sex                             |  |           |          |        |       |           |
| 52 |           |          | male                                  |  | -.0257067 | .0200563 | -1.28  | 0.200 | -.        |
| 53 | 065075    | .0136616 |                                       |  |           |          |        |       |           |
| 54 |           |          | Child age: Spline 1                   |  | -.1042883 | .0047175 | -22.11 | 0.000 | -.1135482 |
| 55 | -.0950283 |          |                                       |  |           |          |        |       |           |
| 56 |           |          | Child age: Spline 2                   |  | .486759   | .0269165 | 18.08  | 0.000 | .         |
| 57 | 4339248   | .5395932 |                                       |  |           |          |        |       |           |
| 58 |           |          | Child age: Spline 3                   |  | -1.256639 | .0801067 | -15.69 | 0.000 | -1.41388  |
| 59 | -1.099398 |          |                                       |  |           |          |        |       |           |
| 60 |           |          | Child age: Spline 4                   |  | 1.166348  | .1016581 | 11.47  | 0.000 | .9668041  |
|    | 1.365892  |          |                                       |  |           |          |        |       |           |

1  
2  
3  
4  
5  
6  
7  
8  
9  
10  
11  
12  
13  
14  
15  
16  
17  
18  
19  
20  
21  
22  
23  
24  
25  
26  
27  
28  
29  
30  
31  
32  
33  
34  
35  
36  
37  
38  
39  
40  
41  
42  
43  
44  
45  
46  
47  
48  
49  
50  
51  
52  
53  
54  
55  
56  
57  
58  
59  
60

|           |          |                        |  |           |          |       |       |           |
|-----------|----------|------------------------|--|-----------|----------|-------|-------|-----------|
|           |          | Mother age: Spline 1   |  | .0019125  | .0108567 | 0.18  | 0.860 | -.        |
| 019398    | .0232231 |                        |  |           |          |       |       |           |
|           |          | Mother age: Spline 2   |  | -.0224618 | .0847035 | -0.27 | 0.791 | -.        |
| 1887258   | .1438022 |                        |  |           |          |       |       |           |
|           |          | Mother age: Spline 3   |  | .0398879  | .2963025 | 0.13  | 0.893 | -.        |
| 5417223   | .6214981 |                        |  |           |          |       |       |           |
|           |          | Mother age: Spline 4   |  | .0071627  | .3412394 | 0.02  | 0.983 | -.        |
| 6626539   | .6769792 |                        |  |           |          |       |       |           |
|           |          | Maternal education     |  |           |          |       |       |           |
|           |          | No education           |  | 0         | (base)   |       |       |           |
|           |          | Incomplete primary     |  | .0488759  | .0463821 | 1.05  | 0.292 | -.        |
| 0421671   | .139919  |                        |  |           |          |       |       |           |
|           |          | Complete primary       |  | .1588457  | .0527452 | 3.01  | 0.003 | .         |
| 0553126   | .2623788 |                        |  |           |          |       |       |           |
|           |          | Incomplete secondary   |  | .1883882  | .0554991 | 3.39  | 0.001 | .         |
| 0794494   | .297327  |                        |  |           |          |       |       |           |
|           |          | Complete secondary     |  | .1462645  | .0662169 | 2.21  | 0.027 | .         |
| 0162877   | .2762413 |                        |  |           |          |       |       |           |
|           |          | Higher                 |  | .027146   | .0887089 | 0.31  | 0.760 | -.        |
| 14698     | .2012721 |                        |  |           |          |       |       |           |
|           |          | Paternal education     |  |           |          |       |       |           |
|           |          | No education           |  | 0         | (base)   |       |       |           |
|           |          | Incomplete primary     |  | .0481782  | .0404576 | 1.19  | 0.234 | -.        |
| 0312358   | .1275922 |                        |  |           |          |       |       |           |
|           |          | Complete primary       |  | .129144   | .0435088 | 2.97  | 0.003 | .         |
| 0437408   | .2145471 |                        |  |           |          |       |       |           |
|           |          | Incomplete secondary   |  | .1699761  | .048209  | 3.53  | 0.000 | .         |
| 0753469   | .2646053 |                        |  |           |          |       |       |           |
|           |          | Complete secondary     |  | .2264776  | .0594698 | 3.81  | 0.000 | .         |
| 1097448   | .3432104 |                        |  |           |          |       |       |           |
|           |          | Higher                 |  | .2946884  | .0784935 | 3.75  | 0.000 | .         |
| 140614    | .4487628 |                        |  |           |          |       |       |           |
|           |          | Missing                |  | .199421   | .2238784 | 0.89  | 0.373 | -.        |
| 2400284   | .6388703 |                        |  |           |          |       |       |           |
|           |          | Wealth index: Spline 1 |  | 2.54e-06  | 1.29e-06 | 1.97  | 0.050 | 2.94e-09  |
| 5.07e-06  |          |                        |  |           |          |       |       |           |
|           |          | Wealth index: Spline 2 |  | 8.90e-06  | .0000165 | 0.54  | 0.588 | -.        |
| 0000234   | .0000412 |                        |  |           |          |       |       |           |
|           |          | Wealth index: Spline 3 |  | -.0000238 | .0000386 | -0.62 | 0.538 | -.        |
| 0000996   | .0000521 |                        |  |           |          |       |       |           |
|           |          | Wealth index: Spline 4 |  | .0000212  | .0000314 | 0.68  | 0.499 | -.        |
| 0000404   | .0000829 |                        |  |           |          |       |       |           |
|           |          | Maternal literacy      |  |           |          |       |       |           |
|           |          | Not literate           |  | 0         | (base)   |       |       |           |
|           |          | Semi-literate          |  | .107135   | .0493893 | 2.17  | 0.030 | .         |
| 010189    | .204081  |                        |  |           |          |       |       |           |
|           |          | Literate               |  | .0213437  | .0467924 | 0.46  | 0.648 | -.        |
| 0705048   | .1131922 |                        |  |           |          |       |       |           |
|           |          | Region                 |  |           |          |       |       |           |
|           |          | metropolitana          |  | 0         | (base)   |       |       |           |
|           |          | norte                  |  | .2036165  | .0795694 | 2.56  | 0.011 | .         |
| 0474302   | .3598027 |                        |  |           |          |       |       |           |
|           |          | nororient              |  | .0574702  | .0633673 | 0.91  | 0.365 | -.        |
| 066913    | .1818534 |                        |  |           |          |       |       |           |
|           |          | surorient              |  | -.0750771 | .0550973 | -1.36 | 0.173 | -.        |
| 1832271   | .033073  |                        |  |           |          |       |       |           |
|           |          | central                |  | -.1015134 | .0512412 | -1.98 | 0.048 | -.2020943 |
| -.0009324 |          |                        |  |           |          |       |       |           |
|           |          | suroccidente           |  | -.1759579 | .0449696 | -3.91 | 0.000 | -.2642286 |
| -.0876873 |          |                        |  |           |          |       |       |           |
|           |          | noroccidente           |  | -.2467906 | .0592465 | -4.17 | 0.000 | -.3630853 |

|    |                 |          |                                       |           |                         |       |       |           |
|----|-----------------|----------|---------------------------------------|-----------|-------------------------|-------|-------|-----------|
| 1  |                 |          |                                       |           |                         |       |       |           |
| 2  |                 |          |                                       |           |                         |       |       |           |
| 3  | -.130496        |          |                                       |           |                         |       |       |           |
| 4  |                 |          | petEn                                 | .370497   | .0589341                | 6.29  | 0.000 | .         |
| 5  | 2548157         | .4861783 |                                       |           |                         |       |       |           |
| 6  |                 |          | Rural or urban                        |           |                         |       |       |           |
| 7  |                 |          | urban                                 | 0         | (base)                  |       |       |           |
| 8  |                 |          | rural                                 | .0608038  | .0326108                | 1.86  | 0.063 | -.        |
| 9  | 0032077         | .1248152 |                                       |           |                         |       |       |           |
| 10 |                 |          | Ethnicity                             |           |                         |       |       |           |
| 11 |                 |          | Indigenous                            | -.149591  | .032084                 | -4.66 | 0.000 | -.2125684 |
| 12 | -.0866136       |          |                                       |           |                         |       |       |           |
| 13 |                 |          | Marital status                        |           |                         |       |       |           |
| 14 |                 |          | Never in union                        | 0         | (base)                  |       |       |           |
| 15 |                 |          | Current partner                       | -.0293857 | .229826                 | -0.13 | 0.898 | -.        |
| 16 | 4805096         | .4217382 |                                       |           |                         |       |       |           |
| 17 |                 |          | Formerly had partner                  | .0765962  | .225326                 | 0.34  | 0.734 | -.        |
| 18 | 3656947         | .518887  |                                       |           |                         |       |       |           |
| 19 |                 |          | Diarrhea                              |           |                         |       |       |           |
| 20 |                 |          | Diarrhea last 2 weeks                 | .0536243  | .0295232                | 1.82  | 0.070 | -.        |
| 21 | 0043265         | .1115752 |                                       |           |                         |       |       |           |
| 22 |                 |          | Language                              |           |                         |       |       |           |
| 23 |                 |          | Indigenous language                   | -.1596944 | .0452356                | -3.53 | 0.000 | -.2484871 |
| 24 | -.0709018       |          |                                       |           |                         |       |       |           |
| 25 |                 |          | _cons                                 | -.9697053 | .3672133                | -2.64 | 0.008 | -1.690506 |
| 26 | -.2489047       |          |                                       |           |                         |       |       |           |
| 27 |                 |          |                                       |           |                         |       |       |           |
| 28 |                 |          |                                       |           |                         |       |       |           |
| 29 |                 |          |                                       |           |                         |       |       |           |
| 30 |                 |          |                                       |           |                         |       |       |           |
| 31 | Model 2A:       |          |                                       |           |                         |       |       |           |
| 32 |                 |          |                                       |           |                         |       |       |           |
| 33 |                 |          |                                       |           |                         |       |       |           |
| 34 |                 |          |                                       |           |                         |       |       |           |
| 35 |                 |          | haz_stunted                           | IRR       | Linearized<br>Std. Err. | t     | P> t  | [95%      |
| 36 | Conf. Interval] |          |                                       |           |                         |       |       |           |
| 37 |                 |          |                                       |           |                         |       |       |           |
| 38 |                 |          | Method current duration               |           |                         |       |       |           |
| 39 |                 |          | None or folkloric                     | 1         | (base)                  |       |       |           |
| 40 |                 |          | Traditional                           | .9736735  | .0433095                | -0.60 | 0.549 | .8922671  |
| 41 | 1.062507        |          |                                       |           |                         |       |       |           |
| 42 |                 |          | Modern, <15 months                    | 1.020183  | .041465                 | 0.49  | 0.623 | .9419539  |
| 43 | 1.104909        |          |                                       |           |                         |       |       |           |
| 44 |                 |          | Modern, 15+ months                    | .9691469  | .0389473                | -0.78 | 0.436 | .8956351  |
| 45 | 1.048692        |          |                                       |           |                         |       |       |           |
| 46 |                 |          | Prior method                          |           |                         |       |       |           |
| 47 |                 |          | None or folkloric                     | 1         | (base)                  |       |       |           |
| 48 |                 |          | Traditional                           | .8874898  | .0415205                | -2.55 | 0.011 | .         |
| 49 | 8096197         | .9728496 |                                       |           |                         |       |       |           |
| 50 |                 |          | Modern                                | .9446191  | .0304602                | -1.77 | 0.078 | .8866819  |
| 51 | 1.006342        |          |                                       |           |                         |       |       |           |
| 52 |                 |          | Place of delivery                     |           |                         |       |       |           |
| 53 |                 |          | respondent's home                     | 1         | (base)                  |       |       |           |
| 54 |                 |          | other home                            | .935322   | .0654678                | -0.96 | 0.340 | .8152527  |
| 55 | 1.073075        |          |                                       |           |                         |       |       |           |
| 56 |                 |          | government hospital                   | .8092617  | .0273822                | -6.25 | 0.000 | .         |
| 57 | 7572593         | .8648351 |                                       |           |                         |       |       |           |
| 58 |                 |          | second level (health centers, mate..) | .8899902  | .0476118                | -2.18 | 0.030 | .         |
| 59 |                 |          |                                       |           |                         |       |       |           |
| 60 |                 |          |                                       |           |                         |       |       |           |

|    |                                       |                         |          |          |        |       |          |  |
|----|---------------------------------------|-------------------------|----------|----------|--------|-------|----------|--|
| 1  | 8012728                               | .9885304                |          |          |        |       |          |  |
| 2  | first level (health post, converge..) |                         | .9960216 | .3459124 | -0.01  | 0.991 | .5037438 |  |
| 3  | 1.969372                              |                         |          |          |        |       |          |  |
| 4  |                                       | other public sector     | 5.49e-06 | 5.59e-06 | -11.90 | 0.000 |          |  |
| 5  | 7.45e-07                              | .0000405                |          |          |        |       |          |  |
| 6  |                                       | private hospital/clinic | .645203  | .0723079 | -3.91  | 0.000 | .        |  |
| 7  | 5177972                               | .8039576                |          |          |        |       |          |  |
| 8  |                                       | doctor's office         | 1.621294 | .7549979 | 1.04   | 0.300 | .6499576 |  |
| 9  | 4.044254                              |                         |          |          |        |       |          |  |
| 10 | family protection association (apr..) |                         | .3501999 | .125604  | -2.93  | 0.004 | .        |  |
| 11 | 1732067                               | .7080557                |          |          |        |       |          |  |
| 12 |                                       | social security (igss)  | .6572189 | .0701198 | -3.93  | 0.000 | .        |  |
| 13 | 533038                                | .8103301                |          |          |        |       |          |  |
| 14 |                                       | other                   | .9140263 | .1605213 | -0.51  | 0.609 | .6475111 |  |
| 15 | 1.290239                              |                         |          |          |        |       |          |  |
| 16 |                                       | Antenatal visits        |          |          |        |       |          |  |
| 17 |                                       | <4 antenatal visiits    | 1        | (base)   |        |       |          |  |
| 18 |                                       | 4+ antenatal visits     | .9101499 | .034101  | -2.51  | 0.012 | .        |  |
| 19 | 8456154                               | .9796094                |          |          |        |       |          |  |
| 20 |                                       | Missing data            | 1.12977  | .0490516 | 2.81   | 0.005 | 1.037475 |  |
| 21 | 1.230275                              |                         |          |          |        |       |          |  |
| 22 |                                       | Distance problem health |          |          |        |       |          |  |
| 23 |                                       | no problem              | 1        | (base)   |        |       |          |  |
| 24 |                                       | big problem             | .9943968 | .0309518 | -0.18  | 0.857 | .9354605 |  |
| 25 | 1.057046                              |                         |          |          |        |       |          |  |
| 26 |                                       | Money problem health    |          |          |        |       |          |  |
| 27 |                                       | no problem              | 1        | (base)   |        |       |          |  |
| 28 |                                       | big problem             | 1.02647  | .034594  | 0.78   | 0.438 | .9607626 |  |
| 29 | 1.09667                               |                         |          |          |        |       |          |  |
| 30 |                                       | Child sex               |          |          |        |       |          |  |
| 31 |                                       | male                    | 1.011284 | .0240865 | 0.47   | 0.638 | .9650926 |  |
| 32 | 1.059685                              |                         |          |          |        |       |          |  |
| 33 |                                       | Child age: Spline 1     | 1.145524 | .0091958 | 16.92  | 0.000 | 1.127615 |  |
| 34 | 1.163718                              |                         |          |          |        |       |          |  |
| 35 |                                       | Child age: Spline 2     | .5508882 | .0209425 | -15.68 | 0.000 | .        |  |
| 36 | 5112766                               | .5935689                |          |          |        |       |          |  |
| 37 |                                       | Child age: Spline 3     | 4.519798 | .4729857 | 14.41  | 0.000 | 3.680525 |  |
| 38 | 5.550451                              |                         |          |          |        |       |          |  |
| 39 |                                       | Child age: Spline 4     | .2596322 | .0304667 | -11.49 | 0.000 | .        |  |
| 40 | 2062169                               | .3268833                |          |          |        |       |          |  |
| 41 |                                       | Mother age: Spline 1    | 1.008775 | .0147986 | 0.60   | 0.552 | .9801409 |  |
| 42 | 1.038245                              |                         |          |          |        |       |          |  |
| 43 |                                       | Mother age: Spline 2    | .925124  | .0992332 | -0.73  | 0.468 | .7494791 |  |
| 44 | 1.141932                              |                         |          |          |        |       |          |  |
| 45 |                                       | Mother age: Spline 3    | 1.339683 | .4818316 | 0.81   | 0.416 | .6613034 |  |
| 46 | 2.713961                              |                         |          |          |        |       |          |  |
| 47 |                                       | Mother age: Spline 4    | .7177368 | .2823167 | -0.84  | 0.399 | .3316276 |  |
| 48 | 1.553387                              |                         |          |          |        |       |          |  |
| 49 |                                       | Maternal education      |          |          |        |       |          |  |
| 50 |                                       | No education            | 1        | (base)   |        |       |          |  |
| 51 |                                       | Incomplete primary      | .9189638 | .0407664 | -1.91  | 0.057 | .8423286 |  |
| 52 | 1.002571                              |                         |          |          |        |       |          |  |
| 53 |                                       | Complete primary        | .7696611 | .0477883 | -4.22  | 0.000 | .        |  |
| 54 | 6813486                               | .8694202                |          |          |        |       |          |  |
| 55 |                                       | Incomplete secondary    | .7269131 | .0563186 | -4.12  | 0.000 | .        |  |
| 56 | 6243612                               | .8463093                |          |          |        |       |          |  |
| 57 |                                       | Complete secondary      | .824937  | .0847815 | -1.87  | 0.061 | .6742319 |  |
| 58 | 1.009328                              |                         |          |          |        |       |          |  |
| 59 |                                       | Higher                  | .7291965 | .135635  | -1.70  | 0.090 | .50615   |  |
| 60 | 1.050533                              |                         |          |          |        |       |          |  |

1  
2  
3  
4  
5  
6  
7  
8  
9  
10  
11  
12  
13  
14  
15  
16  
17  
18  
19  
20  
21  
22  
23  
24  
25  
26  
27  
28  
29  
30  
31  
32  
33  
34  
35  
36  
37  
38  
39  
40  
41  
42  
43  
44  
45  
46  
47  
48  
49  
50  
51  
52  
53  
54  
55  
56  
57  
58  
59  
60

|          |                        |          |          |       |       |          |
|----------|------------------------|----------|----------|-------|-------|----------|
|          | Paternal education     |          |          |       |       |          |
|          | No education           | 1        | (base)   |       |       |          |
| 1.028741 | Incomplete primary     | .967624  | .0301925 | -1.05 | 0.292 | .9101377 |
| 1.011521 | Complete primary       | .9316916 | .0390207 | -1.69 | 0.092 | .858162  |
| 761908   | Incomplete secondary   | .8535782 | .0494047 | -2.74 | 0.006 | .        |
| 5991015  | Complete secondary     | .7165442 | .0653463 | -3.65 | 0.000 | .        |
| 1.05995  | Higher                 | .7784518 | .1224135 | -1.59 | 0.112 | .571713  |
| 1.584053 | Missing                | 1.047753 | .2206321 | 0.22  | 0.825 | .6930233 |
| 1        | Wealth index: Spline 1 | .9999984 | 9.87e-07 | -1.58 | 0.115 | .9999965 |
| 1.00002  | Wealth index: Spline 2 | .9999886 | .0000161 | -0.71 | 0.478 | .9999571 |
| 1.000102 | Wealth index: Spline 3 | 1.000021 | .0000411 | 0.51  | 0.611 | .9999402 |
| 1.000065 | Wealth index: Spline 4 | .9999887 | .000039  | -0.29 | 0.772 | .9999121 |
|          | Maternal literacy      |          |          |       |       |          |
|          | Not literate           | 1        | (base)   |       |       |          |
| 1.095148 | Semi-literate          | .999049  | .0467439 | -0.02 | 0.984 | .911383  |
| 1.193006 | Literate               | 1.086007 | .0519898 | 1.72  | 0.085 | .9886051 |
|          | Region                 |          |          |       |       |          |
|          | metropolitana          | 1        | (base)   |       |       |          |
| 1.134722 | norte                  | .9152934 | .1002066 | -0.81 | 0.419 | .7382972 |
| 1.247262 | nororient              | 1.020258 | .1044201 | 0.20  | 0.845 | .8345683 |
| 1.400587 | surorient              | 1.165443 | .1091232 | 1.64  | 0.102 | .9697773 |
| 1.471403 | central                | 1.233659 | .11076   | 2.34  | 0.020 | 1.034329 |
| 1.536115 | suroccidente           | 1.292893 | .1135373 | 2.93  | 0.004 | 1.088181 |
| 1.521173 | noroccidente           | 1.26257  | .1198525 | 2.46  | 0.014 | 1.047931 |
| 6306498  | pet n                  | .7669317 | .0764422 | -2.66 | 0.008 | .        |
|          | Rural or urban         |          |          |       |       |          |
|          | urban                  | 1        | (base)   |       |       |          |
| 1.002544 | rural                  | .934225  | .0335915 | -1.89 | 0.059 | .8705616 |
|          | Ethnicity              |          |          |       |       |          |
| 1.285331 | Indigenous             | 1.18551  | .0488264 | 4.13  | 0.000 | 1.093441 |
|          | Marital status         |          |          |       |       |          |
|          | Never in union         | 1        | (base)   |       |       |          |
| 2.001238 | Current partner        | 1.296881 | .2866138 | 1.18  | 0.240 | .8404295 |
| 1.866167 | Formerly had partner   | 1.231397 | .2608077 | 0.98  | 0.326 | .8125421 |
|          | Diarrhea               |          |          |       |       |          |

|          |                                 |          |          |       |       |          |
|----------|---------------------------------|----------|----------|-------|-------|----------|
| 1.05464  | Diarrhea last 2 weeks           | .9867626 | .0334428 | -0.39 | 0.694 | .9232538 |
| 1.221557 | Language<br>Indigenous language | 1.122292 | .0484577 | 2.67  | 0.008 | 1.031094 |
| 0329684  | _cons                           | .0718451 | .0285113 | -6.64 | 0.000 | .        |

SENSITIVITY ANALYSIS 3: INCLUSION OF FEEDING INDICATORS

Model 1C:

|                         | haz | Coef.     | Linearized<br>Std. Err. | t     | P> t  | [95% Conf. Interval] |
|-------------------------|-----|-----------|-------------------------|-------|-------|----------------------|
| Method current duration |     |           |                         |       |       |                      |
| None or folkloric       |     | 0         | (base)                  |       |       |                      |
| Traditional             |     | .1880863  | .0643656                | 2.92  | 0.004 | .0617335 .3144392    |
| Modern, <15 months      |     | .1366338  | .048101                 | 2.84  | 0.005 | .0422091 .2310584    |
| Modern, 15+ months      |     | .2434807  | .066285                 | 3.67  | 0.000 | .1133598 .3736015    |
| Method prior            |     |           |                         |       |       |                      |
| None or folkloric       |     | 0         | (base)                  |       |       |                      |
| Traditional             |     | .0703693  | .0582608                | 1.21  | 0.227 | -.0439996 .1847382   |
| Modern                  |     | .0885428  | .0387279                | 2.29  | 0.023 | .0125181 .1645675    |
| Diet frequency          |     |           |                         |       |       |                      |
| 0                       |     | 0         | (base)                  |       |       |                      |
| 1                       |     | -.0668101 | .0472393                | -1.41 | 0.158 | -.1595432 .0259229   |
| Diet diversity          |     |           |                         |       |       |                      |
| 0                       |     | 0         | (base)                  |       |       |                      |
| 1                       |     | .0779764  | .040871                 | 1.91  | 0.057 | -.0022554 .1582082   |
| Child sex               |     |           |                         |       |       |                      |
| male                    |     | -.1354291 | .0353817                | -3.83 | 0.000 | -.2048851 -.0659731  |
| Child age: Spline       |     |           |                         |       |       |                      |
| Spline 1                |     | -.088294  | .0147444                | -5.99 | 0.000 | -.117238 -.05935     |
| Spline 2                |     | .2479096  | .128152                 | 1.93  | 0.053 | -.0036591 .4994784   |
| Spline 3                |     | .3304688  | 1.672652                | 0.20  | 0.843 | -2.953031 3.613968   |
| Spline 4                |     | 0         | (omitted)               |       |       |                      |
| Mother age: Spline      |     |           |                         |       |       |                      |
| Spline 1                |     | .0040045  | .0172142                | 0.23  | 0.816 | -.0297877 .0377968   |
| Spline 2                |     | .0151235  | .138368                 | 0.11  | 0.913 | -.2564997 .2867467   |
| Spline 3                |     | -.1805745 | .4840328                | -0.37 | 0.709 | -1.130755 .7696059   |
| Spline 4                |     | .3379249  | .564284                 | 0.60  | 0.549 | -.7697926 1.445643   |
| Maternal education      |     |           |                         |       |       |                      |
| No education            |     | 0         | (base)                  |       |       |                      |
| Incomplete primary      |     | -.0041856 | .0786636                | -0.05 | 0.958 | -.1586062 .1502349   |
| Complete primary        |     | .110394   | .0932532                | 1.18  | 0.237 | -.0726667 .2934547   |
| Incomplete secondary    |     | .1384189  | .1018207                | 1.36  | 0.174 | -.0614602 .3382979   |
| Complete secondary      |     | .1469192  | .1092599                | 1.34  | 0.179 | -.0675634 .3614018   |
| Higher                  |     | .0710917  | .1653868                | 0.43  | 0.667 | -.2535708 .3957542   |
| Paternal education      |     |           |                         |       |       |                      |
| No education            |     | 0         | (base)                  |       |       |                      |
| Incomplete primary      |     | -.0255779 | .0623578                | -0.41 | 0.682 | -.1479892 .0968335   |
| Complete primary        |     | .031635   | .0685071                | 0.46  | 0.644 | -.1028478 .1661179   |

|    |                        |           |          |       |       |           |           |
|----|------------------------|-----------|----------|-------|-------|-----------|-----------|
| 1  |                        |           |          |       |       |           |           |
| 2  |                        |           |          |       |       |           |           |
| 3  | Incomplete secondary   | .0639965  | .0745999 | 0.86  | 0.391 | -.0824468 | .2104399  |
| 4  | Complete secondary     | .0916259  | .0933234 | 0.98  | 0.327 | -.0915725 | .2748243  |
| 5  | Higher                 | .208465   | .1518507 | 1.37  | 0.170 | -.0896255 | .5065554  |
| 6  | Missing                | 1.435638  | .9525824 | 1.51  | 0.132 | -.4343286 | 3.305604  |
| 7  | Wealth index: Spline 1 | 4.46e-06  | 2.10e-06 | 2.12  | 0.034 | 3.28e-07  | 8.59e-06  |
| 8  | Wealth index: Spline 2 | -.0000144 | .0000266 | -0.54 | 0.590 | -.0000666 | .0000379  |
| 9  | Wealth index: Spline 3 | .0000247  | .0000625 | 0.40  | 0.692 | -.0000979 | .0001474  |
| 10 | Wealth index: Spline 4 | -7.00e-06 | .0000505 | -0.14 | 0.890 | -.0001062 | .0000922  |
| 11 | Maternal literacy      |           |          |       |       |           |           |
| 12 | Not literate           | 0         | (base)   |       |       |           |           |
| 13 | Semi-literate          | .0604922  | .0839243 | 0.72  | 0.471 | -.1042555 | .2252398  |
| 14 | Literate               | .0535773  | .08147   | 0.66  | 0.511 | -.1063524 | .213507   |
| 15 | Region                 |           |          |       |       |           |           |
| 16 | metropolitana          | 0         | (base)   |       |       |           |           |
| 17 | norte                  | .3005916  | .1128077 | 2.66  | 0.008 | .0791445  | .5220387  |
| 18 | nororient              | .1807732  | .0852208 | 2.12  | 0.034 | .0134805  | .3480659  |
| 19 | surorient              | .0498577  | .0898449 | 0.55  | 0.579 | -.1265123 | .2262277  |
| 20 | central                | -.096746  | .0821803 | -1.18 | 0.239 | -.25807   | .0645781  |
| 21 | suroccidente           | -.1433444 | .0753869 | -1.90 | 0.058 | -.2913326 | .0046438  |
| 22 | noroccidente           | -.2780176 | .0921514 | -3.02 | 0.003 | -.4589154 | -.0971199 |
| 23 | petEn                  | .4479386  | .1041991 | 4.30  | 0.000 | .2433905  | .6524866  |
| 24 | Rural or urban         |           |          |       |       |           |           |
| 25 | urban                  | 0         | (base)   |       |       |           |           |
| 26 | rural                  | .1446199  | .048833  | 2.96  | 0.003 | .0487583  | .2404816  |
| 27 | Ethnicity              |           |          |       |       |           |           |
| 28 | Indigenous             | -.1376972 | .0482618 | -2.85 | 0.004 | -.2324374 | -.042957  |
| 29 | Marital status         |           |          |       |       |           |           |
| 30 | Never in union         | 0         | (base)   |       |       |           |           |
| 31 | Current partner        | 1.12376   | .9571631 | 1.17  | 0.241 | -.7551986 | 3.002719  |
| 32 | Formerly had partner   | 1.256197  | .9543959 | 1.32  | 0.188 | -.6173295 | 3.129724  |
| 33 | Diarrhea               |           |          |       |       |           |           |
| 34 | Diarrhea last 2 weeks  | .0721225  | .0441852 | 1.63  | 0.103 | -.0146151 | .1588602  |
| 35 | Language               |           |          |       |       |           |           |
| 36 | Indigenous language    | -.1802509 | .0611046 | -2.95 | 0.003 | -.3002023 | -.0602996 |
| 37 |                        |           |          |       |       |           |           |
| 38 | _cons                  | -1.815738 | 1.078544 | -1.68 | 0.093 | -3.932973 | .3014976  |

Model 2A:

| haz_stunted | IRR                     | Linearized Std. Err. | t        | P> t  | [95% Conf. Interval] |          |          |
|-------------|-------------------------|----------------------|----------|-------|----------------------|----------|----------|
| 46          | Method current duration |                      |          |       |                      |          |          |
| 47          | None or folkloric       | 1                    | (base)   |       |                      |          |          |
| 48          | Traditional             | .8788432             | .0653663 | -1.74 | 0.083                | .7594538 | 1.017001 |
| 49          | Modern, <15 months      | .9167734             | .0522975 | -1.52 | 0.128                | .8196503 | 1.025405 |
| 50          | Modern, 15+ months      | .8664282             | .0690317 | -1.80 | 0.072                | .7409814 | 1.013113 |
| 51          | Method prior            |                      |          |       |                      |          |          |
| 52          | None or folkloric       | 1                    | (base)   |       |                      |          |          |
| 53          | Traditional             | .8646904             | .0717855 | -1.75 | 0.080                | .7346555 | 1.017742 |
| 54          | Modern                  | .9895231             | .0499375 | -0.21 | 0.835                | .8961926 | 1.092573 |
| 55          | Diet frequency          |                      |          |       |                      |          |          |
| 56          | 0                       | 1                    | (base)   |       |                      |          |          |



|    |                        |          |           |       |       |          |          |
|----|------------------------|----------|-----------|-------|-------|----------|----------|
| 1  |                        |          |           |       |       |          |          |
| 2  |                        |          |           |       |       |          |          |
| 3  | 1                      | 1.022899 | .0551032  | 0.42  | 0.674 | .9202519 | 1.136996 |
| 4  |                        |          |           |       |       |          |          |
| 5  | Diet diversity         |          |           |       |       |          |          |
| 6  | 0                      | 1        | (base)    |       |       |          |          |
| 7  | 1                      | .9208599 | .0415069  | -1.83 | 0.068 | .8428805 | 1.006054 |
| 8  | Child sex              |          |           |       |       |          |          |
| 9  | male                   | 1.140052 | .0485236  | 3.08  | 0.002 | 1.048668 | 1.239398 |
| 10 |                        |          |           |       |       |          |          |
| 11 | Child age: Spline 1    | 1.114475 | .0237148  | 5.09  | 0.000 | 1.068881 | 1.162015 |
| 12 | Child age: Spline 2    | .64956   | .1046418  | -2.68 | 0.008 | .4734541 | .8911702 |
| 13 | Child age: Spline 3    | 6.559257 | 12.08427  | 1.02  | 0.308 | .1762778 | 244.0684 |
| 14 | Child age: Spline 4    | 1        | (omitted) |       |       |          |          |
| 15 | Mother age: Spline 1   | 1.031112 | .0213616  | 1.48  | 0.140 | .9900198 | 1.073911 |
| 16 | Mother age: Spline 2   | .7373484 | .1196865  | -1.88 | 0.061 | .5361521 | 1.014046 |
| 17 | Mother age: Spline 3   | 2.929473 | 1.662338  | 1.89  | 0.059 | .9616394 | 8.924149 |
| 18 | Mother age: Spline 4   | .3191586 | .2098133  | -1.74 | 0.083 | .0878112 | 1.160014 |
| 19 | Maternal education     |          |           |       |       |          |          |
| 20 | No education           | 1        | (base)    |       |       |          |          |
| 21 | Incomplete primary     | 1.027713 | .0778599  | 0.36  | 0.718 | .8856923 | 1.192506 |
| 22 | Complete primary       | .9114823 | .0855711  | -0.99 | 0.324 | .7580721 | 1.095938 |
| 23 | Incomplete secondary   | .8045485 | .0968907  | -1.81 | 0.071 | .635158  | 1.019114 |
| 24 | Complete secondary     | .7545891 | .1204316  | -1.76 | 0.078 | .5516274 | 1.032227 |
| 25 | Higher                 | .704365  | .2037452  | -1.21 | 0.226 | .3992004 | 1.24281  |
| 26 | Paternal education     |          |           |       |       |          |          |
| 27 | No education           | 1        | (base)    |       |       |          |          |
| 28 | Incomplete primary     | .9667114 | .0574509  | -0.57 | 0.569 | .8602624 | 1.086332 |
| 29 | Complete primary       | .9411576 | .0661749  | -0.86 | 0.389 | .8198195 | 1.080454 |
| 30 | Incomplete secondary   | .880693  | .0719756  | -1.55 | 0.120 | .7501527 | 1.03395  |
| 31 | Complete secondary     | .8743804 | .1071246  | -1.10 | 0.274 | .6874663 | 1.112114 |
| 32 | Higher                 | .8291396 | .1980682  | -0.78 | 0.433 | .5187631 | 1.325215 |
| 33 | Missing                | .6870408 | .3758151  | -0.69 | 0.493 | .2347673 | 2.010608 |
| 34 | Wealth index: Spline 1 | .9999974 | 1.67e-06  | -1.57 | 0.117 | .9999941 | 1.000001 |
| 35 | Wealth index: Spline 2 | .9999977 | .000026   | -0.09 | 0.931 | .9999467 | 1.000049 |
| 36 | Wealth index: Spline 3 | 1.000009 | .0000666  | 0.13  | 0.896 | .999878  | 1.000139 |
| 37 | Wealth index: Spline 4 | .9999857 | .000063   | -0.23 | 0.820 | .999862  | 1.000109 |
| 38 | Maternal literacy      |          |           |       |       |          |          |
| 39 | Not literate           | 1        | (base)    |       |       |          |          |
| 40 | Semi-literate          | .9973228 | .0843055  | -0.03 | 0.975 | .844829  | 1.177342 |
| 41 | Literate               | 1.024735 | .0816006  | 0.31  | 0.759 | .8764414 | 1.19812  |
| 42 | Region                 |          |           |       |       |          |          |
| 43 | metropolitana          | 1        | (base)    |       |       |          |          |
| 44 | norte                  | .8166099 | .1263305  | -1.31 | 0.191 | .6027337 | 1.106379 |
| 45 | nororiente             | .9398082 | .1331987  | -0.44 | 0.661 | .7115554 | 1.24128  |
| 46 | suroriente             | 1.087546 | .1477269  | 0.62  | 0.537 | .8329952 | 1.419883 |
| 47 | central                | 1.265704 | .1567134  | 1.90  | 0.057 | .9926005 | 1.613949 |
| 48 | suroccidente           | 1.324226 | .1628081  | 2.28  | 0.023 | 1.040269 | 1.685693 |
| 49 | noroccidente           | 1.286635 | .1790628  | 1.81  | 0.071 | .9790526 | 1.690849 |
| 50 | petEn                  | .6743899 | .1205663  | -2.20 | 0.028 | .4747829 | .957915  |
| 51 | Rural or urban         |          |           |       |       |          |          |
| 52 | urban                  | 1        | (base)    |       |       |          |          |
| 53 | rural                  | .8930934 | .0487958  | -2.07 | 0.039 | .8022628 | .9942076 |
| 54 | Ethnicity              |          |           |       |       |          |          |
| 55 | Indigenous             | 1.180856 | .07445    | 2.64  | 0.009 | 1.043389 | 1.336434 |
| 56 | Marital status         |          |           |       |       |          |          |
| 57 | Never in union         | 1        | (base)    |       |       |          |          |
| 58 | Current partner        | .9039778 | .5057601  | -0.18 | 0.857 | .3014222 | 2.711067 |
| 59 | Formerly had partner   | .8441088 | .4662847  | -0.31 | 0.759 | .2854009 | 2.496557 |

|    |                       |          |          |          |       |       |          |
|----|-----------------------|----------|----------|----------|-------|-------|----------|
| 1  |                       |          |          |          |       |       |          |
| 2  |                       |          |          |          |       |       |          |
| 3  |                       |          |          |          |       |       |          |
| 4  |                       | Diarrhea |          |          |       |       |          |
| 5  | Diarrhea last 2 weeks |          | .9602702 | .0448894 | -0.87 | 0.386 | .8760723 |
| 6  |                       | Language |          |          |       |       |          |
| 7  | Indigenous language   |          | 1.190726 | .0768103 | 2.71  | 0.007 | 1.0491   |
| 8  |                       |          |          |          |       |       | 1.351472 |
| 9  |                       | _cons    | .0642134 | .0500596 | -3.52 | 0.000 | .0138995 |
| 10 |                       |          |          |          |       |       | .296655  |
| 11 |                       |          |          |          |       |       |          |
| 12 |                       |          |          |          |       |       |          |
| 13 |                       |          |          |          |       |       |          |
| 14 |                       |          |          |          |       |       |          |
| 15 |                       |          |          |          |       |       |          |
| 16 |                       |          |          |          |       |       |          |
| 17 |                       |          |          |          |       |       |          |
| 18 |                       |          |          |          |       |       |          |
| 19 |                       |          |          |          |       |       |          |
| 20 |                       |          |          |          |       |       |          |
| 21 |                       |          |          |          |       |       |          |
| 22 |                       |          |          |          |       |       |          |
| 23 |                       |          |          |          |       |       |          |
| 24 |                       |          |          |          |       |       |          |
| 25 |                       |          |          |          |       |       |          |
| 26 |                       |          |          |          |       |       |          |
| 27 |                       |          |          |          |       |       |          |
| 28 |                       |          |          |          |       |       |          |
| 29 |                       |          |          |          |       |       |          |
| 30 |                       |          |          |          |       |       |          |
| 31 |                       |          |          |          |       |       |          |
| 32 |                       |          |          |          |       |       |          |
| 33 |                       |          |          |          |       |       |          |
| 34 |                       |          |          |          |       |       |          |
| 35 |                       |          |          |          |       |       |          |
| 36 |                       |          |          |          |       |       |          |
| 37 |                       |          |          |          |       |       |          |
| 38 |                       |          |          |          |       |       |          |
| 39 |                       |          |          |          |       |       |          |
| 40 |                       |          |          |          |       |       |          |
| 41 |                       |          |          |          |       |       |          |
| 42 |                       |          |          |          |       |       |          |
| 43 |                       |          |          |          |       |       |          |
| 44 |                       |          |          |          |       |       |          |
| 45 |                       |          |          |          |       |       |          |
| 46 |                       |          |          |          |       |       |          |
| 47 |                       |          |          |          |       |       |          |
| 48 |                       |          |          |          |       |       |          |
| 49 |                       |          |          |          |       |       |          |
| 50 |                       |          |          |          |       |       |          |
| 51 |                       |          |          |          |       |       |          |
| 52 |                       |          |          |          |       |       |          |
| 53 |                       |          |          |          |       |       |          |
| 54 |                       |          |          |          |       |       |          |
| 55 |                       |          |          |          |       |       |          |
| 56 |                       |          |          |          |       |       |          |
| 57 |                       |          |          |          |       |       |          |
| 58 |                       |          |          |          |       |       |          |
| 59 |                       |          |          |          |       |       |          |
| 60 |                       |          |          |          |       |       |          |

Confidential: For Review Only

## STROBE Statement—checklist of items that should be included in reports of observational studies

|                           | Item No. | Recommendation                                                                                                                                                                                                                                                                                                                                                                                                                                                         | Page No. | Relevant text from manuscript                                                                                                                                                                                                                                              |
|---------------------------|----------|------------------------------------------------------------------------------------------------------------------------------------------------------------------------------------------------------------------------------------------------------------------------------------------------------------------------------------------------------------------------------------------------------------------------------------------------------------------------|----------|----------------------------------------------------------------------------------------------------------------------------------------------------------------------------------------------------------------------------------------------------------------------------|
| <b>Title and abstract</b> | 1        | (a) Indicate the study's design with a commonly used term in the title or the abstract                                                                                                                                                                                                                                                                                                                                                                                 | 1        | See title                                                                                                                                                                                                                                                                  |
|                           |          | (b) Provide in the abstract an informative and balanced summary of what was done and what was found                                                                                                                                                                                                                                                                                                                                                                    | 3-4      | See abstract text                                                                                                                                                                                                                                                          |
| <b>Introduction</b>       |          |                                                                                                                                                                                                                                                                                                                                                                                                                                                                        |          |                                                                                                                                                                                                                                                                            |
| Background/rationale      | 2        | Explain the scientific background and rationale for the investigation being reported                                                                                                                                                                                                                                                                                                                                                                                   | 6-7      | The introductory text describes the scientific background and builds the study rationale                                                                                                                                                                                   |
| Objectives                | 3        | State specific objectives, including any prespecified hypotheses                                                                                                                                                                                                                                                                                                                                                                                                       | Page 7   | "Within this background, we hypothesize that maternal contraception is associated with better child linear growth and less stunting in Guatemala."                                                                                                                         |
| <b>Methods</b>            |          |                                                                                                                                                                                                                                                                                                                                                                                                                                                                        |          |                                                                                                                                                                                                                                                                            |
| Study design              | 4        | Present key elements of study design early in the paper                                                                                                                                                                                                                                                                                                                                                                                                                | Page 7   | See text under "Study design and sample"                                                                                                                                                                                                                                   |
| Setting                   | 5        | Describe the setting, locations, and relevant dates, including periods of recruitment, exposure, follow-up, and data collection                                                                                                                                                                                                                                                                                                                                        | Page 7   | See text under "Study design and sample"                                                                                                                                                                                                                                   |
| Participants              | 6        | (a) <i>Cohort study</i> —Give the eligibility criteria, and the sources and methods of selection of participants. Describe methods of follow-up<br><i>Case-control study</i> —Give the eligibility criteria, and the sources and methods of case ascertainment and control selection. Give the rationale for the choice of cases and controls<br><i>Cross-sectional study</i> —Give the eligibility criteria, and the sources and methods of selection of participants | Page 7   | "...we conducted a secondary analysis of survey data from the 2014-2015 Demographic and Health Survey (DHS). Details on survey design can be found in the DHS report. <sup>23</sup> We used the Children's Recode file, which comprises 12,440 children ages 0-59 months." |
|                           |          | (b) <i>Cohort study</i> —For matched studies, give matching criteria and number of exposed and                                                                                                                                                                                                                                                                                                                                                                         |          |                                                                                                                                                                                                                                                                            |

1  
2  
3  
4  
5  
6  
7  
8  
9  
10  
11  
12  
13  
14  
15  
16  
17  
18  
19  
20  
21  
22  
23  
24  
25  
26  
27  
28  
29  
30  
31  
32  
33  
34  
35  
36  
37  
38  
39  
40  
41  
42  
43  
44  
45  
46

unexposed  
*Case-control study*—For matched studies, give matching criteria and the number of controls per case

|                           |    |                                                                                                                                                                                      |     |                                                                                                                                                            |
|---------------------------|----|--------------------------------------------------------------------------------------------------------------------------------------------------------------------------------------|-----|------------------------------------------------------------------------------------------------------------------------------------------------------------|
| Variables                 | 7  | Clearly define all outcomes, exposures, predictors, potential confounders, and effect modifiers. Give diagnostic criteria, if applicable                                             | 7-9 | In the text on these pages, we extensively define and discuss all variables.                                                                               |
| Data sources/ measurement | 8* | For each variable of interest, give sources of data and details of methods of assessment (measurement). Describe comparability of assessment methods if there is more than one group | 7   | This study is a secondary analysis of DHS data, so we cite the DHS report which has further details on survey collection and data processing               |
| Bias                      | 9  | Describe any efforts to address potential sources of bias                                                                                                                            | 8-9 | We imply that we protected against bias by using pre-specified confounding variables, and we state that we do not correct for multiple hypothesis testing. |
| Study size                | 10 | Explain how the study size was arrived at                                                                                                                                            | 7   | We state we that we use the nationally representative sample of children available in the original DHS survey.                                             |

Continued on next page

|                        |     |                                                                                                                                                                                                                                                                                                           |       |                                                                                                                                                                                                   |
|------------------------|-----|-----------------------------------------------------------------------------------------------------------------------------------------------------------------------------------------------------------------------------------------------------------------------------------------------------------|-------|---------------------------------------------------------------------------------------------------------------------------------------------------------------------------------------------------|
| Quantitative variables | 11  | Explain how quantitative variables were handled in the analyses. If applicable, describe which groupings were chosen and why                                                                                                                                                                              | 8-10  | We extensively discuss our quantitative dependent variable (HAZ) and confounding variables.                                                                                                       |
| Statistical methods    | 12  | (a) Describe all statistical methods, including those used to control for confounding                                                                                                                                                                                                                     | 9-10  | See text under “statistical analysis”                                                                                                                                                             |
|                        |     | (b) Describe any methods used to examine subgroups and interactions                                                                                                                                                                                                                                       | N/A   | Subgroup analysis was not performed                                                                                                                                                               |
|                        |     | (c) Explain how missing data were addressed                                                                                                                                                                                                                                                               | 9     | Eight percent of children were excluded due to missing data when fitting these models.                                                                                                            |
|                        |     | (d) <i>Cohort study</i> —If applicable, explain how loss to follow-up was addressed<br><i>Case-control study</i> —If applicable, explain how matching of cases and controls was addressed<br><i>Cross-sectional study</i> —If applicable, describe analytical methods taking account of sampling strategy | 10    | See extensive discussion of sensitivity analyses                                                                                                                                                  |
|                        |     | (e) Describe any sensitivity analyses                                                                                                                                                                                                                                                                     |       |                                                                                                                                                                                                   |
| <b>Results</b>         |     |                                                                                                                                                                                                                                                                                                           |       |                                                                                                                                                                                                   |
| Participants           | 13* | (a) Report numbers of individuals at each stage of study—eg numbers potentially eligible, examined for eligibility, confirmed eligible, included in the study, completing follow-up, and analysed                                                                                                         | 11-13 | In the Results section beginning on page 11, we specify the number of records available for each variable. We also discuss on page 9 how missing records were handled in the regression analyses. |
|                        |     | (b) Give reasons for non-participation at each stage                                                                                                                                                                                                                                                      | N/A   | Given use of secondary survey data, this is not applicable                                                                                                                                        |
|                        |     | (c) Consider use of a flow diagram                                                                                                                                                                                                                                                                        | N/A   | Given use of secondary survey data, we chose not to use a flow diagram                                                                                                                            |
| Descriptive data       | 14* | (a) Give characteristics of study participants (eg demographic, clinical, social) and information on exposures and potential confounders                                                                                                                                                                  | 11-13 | See section under “Sample characteristics and bivariate analyses”                                                                                                                                 |
|                        |     | (b) Indicate number of participants with missing data for each variable of interest                                                                                                                                                                                                                       | 11-13 | See table 1                                                                                                                                                                                       |
|                        |     | (c) <i>Cohort study</i> —Summarise follow-up time (eg, average and total amount)                                                                                                                                                                                                                          | N/A   |                                                                                                                                                                                                   |
| Outcome data           | 15* | <i>Cohort study</i> —Report numbers of outcome events or summary measures over time                                                                                                                                                                                                                       |       |                                                                                                                                                                                                   |

1  
2  
3  
4  
5  
6  
7  
8  
9  
10  
11  
12  
13  
14  
15  
16  
17  
18  
19  
20  
21  
22  
23  
24  
25  
26  
27  
28  
29  
30  
31  
32  
33  
34  
35  
36  
37  
38  
39  
40  
41  
42  
43  
44  
45  
46

|              |    |                                                                                                                                                                                                              |       |                                                                                                                                                                                  |
|--------------|----|--------------------------------------------------------------------------------------------------------------------------------------------------------------------------------------------------------------|-------|----------------------------------------------------------------------------------------------------------------------------------------------------------------------------------|
|              |    | <i>Case-control study</i> —Report numbers in each exposure category, or summary measures of exposure                                                                                                         |       |                                                                                                                                                                                  |
|              |    | <i>Cross-sectional study</i> —Report numbers of outcome events or summary measures                                                                                                                           | 11-13 | See Table 1                                                                                                                                                                      |
| Main results | 16 | (a) Give unadjusted estimates and, if applicable, confounder-adjusted estimates and their precision (eg, 95% confidence interval). Make clear which confounders were adjusted for and why they were included | 14    | See Table 2 (unadjusted bivariate associations) before the final adjusted multivariable models are reported in Tables 3-5                                                        |
|              |    | (b) Report category boundaries when continuous variables were categorized                                                                                                                                    | 11-13 | We report category boundaries in Table 1                                                                                                                                         |
|              |    | (c) If relevant, consider translating estimates of relative risk into absolute risk for a meaningful time period                                                                                             | 16-18 | As discussed in the methods, we opted to use Poisson models to calculate prevalence ratio. Overall descriptive statistics for dependent variables are reported in Tables 1 and 2 |

Continued on next page

|                          |    |                                                                                                                                                                            |       |                                                                                                                                                                                           |
|--------------------------|----|----------------------------------------------------------------------------------------------------------------------------------------------------------------------------|-------|-------------------------------------------------------------------------------------------------------------------------------------------------------------------------------------------|
| Other analyses           | 17 | Report other analyses done—eg analyses of subgroups and interactions, and sensitivity analyses                                                                             | 18    | See this page for sensitivity analyses results                                                                                                                                            |
| <b>Discussion</b>        |    |                                                                                                                                                                            |       |                                                                                                                                                                                           |
| Key results              | 18 | Summarise key results with reference to study objectives                                                                                                                   | 19    | Initial paragraph of discussion                                                                                                                                                           |
| Limitations              | 19 | Discuss limitations of the study, taking into account sources of potential bias or imprecision. Discuss both direction and magnitude of any potential bias                 | 21-22 | We discuss some of the definitional limitations as well as study weaknesses/limitations                                                                                                   |
| Interpretation           | 20 | Give a cautious overall interpretation of results considering objectives, limitations, multiplicity of analyses, results from similar studies, and other relevant evidence | 20-22 | We give a cautious interpretation of these results and attempt to locate this study within the broader literature in Guatemala and globally                                               |
| Generalisability         | 21 | Discuss the generalisability (external validity) of the study results                                                                                                      | 21-22 | We discuss that a weakness of this study is lack of generalizability outside of Guatemala, though this study might motivate others to assess growth and contraception in other countries. |
| <b>Other information</b> |    |                                                                                                                                                                            |       |                                                                                                                                                                                           |
| Funding                  | 22 | Give the source of funding and the role of the funders for the present study and, if applicable, for the original study on which the present article is based              | 29    | We report funding.                                                                                                                                                                        |

\*Give information separately for cases and controls in case-control studies and, if applicable, for exposed and unexposed groups in cohort and cross-sectional studies.

**Note:** An Explanation and Elaboration article discusses each checklist item and gives methodological background and published examples of transparent reporting. The STROBE checklist is best used in conjunction with this article (freely available on the Web sites of PLoS Medicine at <http://www.plosmedicine.org/>, Annals of Internal Medicine at <http://www.annals.org/>, and Epidemiology at <http://www.epidem.com/>). Information on the STROBE Initiative is available at [www.strobe-statement.org](http://www.strobe-statement.org).
