# Supplementary material for: Associations between contraception and stunting in Guatemala: secondary analysis of the 2014–2015 Demographic and Health Survey
Source: PubMed Central journal article supplement — BMJ Paediatr Open. 2019 Aug 22;3(1):e000510. doi: 10.1136/bmjpo-2019-000510 (PMC6721081; doi:10.1136/bmjpo-2019-000510), 2019-08-22
Supplement: bmjpo-2019-000510supp001.pdf [file bmjpo-2019-000510supp001.pdf]

**Supplementary File 1: Full results of models**

Page 1: Current contraceptive use (Model 1A)

Page 2: Adding prior contraceptive use to Model 1A (Model 1B)

Page 3: Adding duration of current contraceptive use to Model 1B (Model 1C)

Page 4: Adding proxy variables of contraception of birth interval and birth order to Model 1C (Model 1D)

Page 6: Multivariable Poisson regression model for stunting (Model 2A)

Page 7: Multivariable Poisson regression model for severe stunting (Model 2B)

Model 1A:

| HAZ                    | Coef.     | Linearized Std. Err. | t      | P> t  | [95% Conf. Interval] |           |
|------------------------|-----------|----------------------|--------|-------|----------------------|-----------|
| Current method         | 0         | (base)               |        |       |                      |           |
| None or folkloric      |           |                      |        |       |                      |           |
| Traditional            | .1211671  | .0388904             | 3.12   | 0.002 | .0448294             | .1975049  |
| Modern                 | .1044309  | .0271529             | 3.85   | 0.000 | .0511326             | .1577291  |
| Child sex              |           |                      |        |       |                      |           |
| Male                   | -.0155443 | .0202571             | -0.77  | 0.443 | -.0553067            | .0242182  |
| Child age: Spline 1    | -.106146  | .0048012             | -22.11 | 0.000 | -.1155703            | -.0967217 |
| Child age: Spline 2    | .4893727  | .0276793             | 17.68  | 0.000 | .4350412             | .5437043  |
| Child age: Spline 3    | -1.274893 | .0825057             | -15.45 | 0.000 | -1.436843            | -1.112943 |
| Child age: Spline 4    | 1.202289  | .1042562             | 11.53  | 0.000 | .9976451             | 1.406933  |
| Mother age: Spline 1   | .0017027  | .0109052             | 0.16   | 0.876 | -.0197031            | .0231084  |
| Mother age: Spline 2   | .0085074  | .0871711             | 0.10   | 0.922 | -.1626001            | .179615   |
| Mother age: Spline 3   | -.0656902 | .3048907             | -0.22  | 0.829 | -.6641582            | .5327777  |
| Mother age: Spline 4   | .1177456  | .3492799             | 0.34   | 0.736 | -.5678537            | .8033449  |
| Maternal education     | 0         | (base)               |        |       |                      |           |
| No education           |           |                      |        |       |                      |           |
| Incomplete primary     | .0367643  | .047059              | 0.78   | 0.435 | -.0556075            | .129136   |
| Complete primary       | .1440098  | .0530075             | 2.72   | 0.007 | .0399617             | .2480579  |
| Incomplete secondary   | .1944541  | .0568369             | 3.42   | 0.001 | .0828893             | .306019   |
| Complete secondary     | .1658597  | .0664803             | 2.49   | 0.013 | .0353661             | .2963534  |
| Higher                 | .0353242  | .0909657             | 0.39   | 0.698 | -.1432318            | .2138802  |
| Paternal education     | 0         | (base)               |        |       |                      |           |
| No education           |           |                      |        |       |                      |           |
| Incomplete primary     | .0662492  | .0407716             | 1.62   | 0.105 | -.0137811            | .1462796  |
| Complete primary       | .1606222  | .0450818             | 3.56   | 0.000 | .0721315             | .249113   |
| Incomplete secondary   | .2186094  | .048891              | 4.47   | 0.000 | .1226417             | .3145772  |
| Complete secondary     | .2883964  | .0604127             | 4.77   | 0.000 | .1698128             | .4069801  |
| Higher                 | .3721726  | .0796786             | 4.67   | 0.000 | .2157719             | .5285733  |
| Missing                | .2141107  | .2224335             | 0.96   | 0.336 | -.2225024            | .6507239  |
| Wealth index: Spline 1 | 3.43e-06  | 1.35e-06             | 2.54   | 0.011 | 7.82e-07             | 6.07e-06  |
| Wealth index: Spline 2 | 9.86e-06  | .0000173             | 0.57   | 0.568 | -.000024             | .0000437  |
| Wealth index: Spline 3 | -.0000282 | .0000404             | -0.70  | 0.486 | -.0001075            | .0000511  |
| Wealth index: Spline 4 | .0000271  | .0000326             | 0.83   | 0.406 | -.0000368            | .0000091  |
| Maternal Literacy      | 0         | (base)               |        |       |                      |           |
| Not literate           |           |                      |        |       |                      |           |
| Semi-literate          | .1331506  | .0494539             | 2.69   | 0.007 | .0360778             | .2302234  |
| Literate               | .0744441  | .0479646             | 1.55   | 0.121 | -.0197054            | .1685936  |
| Region                 | 0         | (base)               |        |       |                      |           |
| metropolitana          |           |                      |        |       |                      |           |
| norte                  | .2640545  | .0800842             | 3.30   | 0.001 | .1068577             | .4212512  |
| nororiental            | .0592136  | .0661443             | 0.90   | 0.371 | -.0706206            | .1890479  |
| suroriental            | -.0541307 | .0559854             | -0.97  | 0.334 | -.164024             | .0557626  |
| central                | -.0962306 | .0505558             | -1.90  | 0.057 | -.1954662            | .0030049  |
| suroccidental          | -.1789787 | .0446085             | -4.01  | 0.000 | -.2665404            | -.0914171 |
| noroccidental          | -.2629405 | .061064              | -4.31  | 0.000 | -.3828027            | -.1430784 |
| petEn                  | .4091089  | .0575714             | 7.11   | 0.000 | .2961025             | .5221154  |
| Rural or urban         | 0         | (base)               |        |       |                      |           |
| urban                  |           |                      |        |       |                      |           |
| rural                  | .046483   | .0338391             | 1.37   | 0.170 | -.0199396            | .1129056  |
| Ethnicity              |           |                      |        |       |                      |           |
| Indigenous             | -.1902424 | .0330231             | -5.76  | 0.000 | -.2550632            | -.1254215 |

|                       |           |          |       |       |           |           |
|-----------------------|-----------|----------|-------|-------|-----------|-----------|
| Marital status        |           |          |       |       |           |           |
| Never in union        | 0         | (base)   |       |       |           |           |
| Current partner       | -.0727036 | .2283634 | -0.32 | 0.750 | -.5209565 | .3755493  |
| Formerly had partner  | .0728528  | .2230525 | 0.33  | 0.744 | -.3649755 | .5106811  |
| Diarrhea              |           |          |       |       |           |           |
| Diarrhea last 2 weeks | .0617092  | .0296525 | 2.08  | 0.038 | .0035045  | .1199139  |
| language              |           |          |       |       |           |           |
| Indigenous language   | -.2098944 | .0467888 | -4.49 | 0.000 | -.3017359 | -.1180529 |
| _cons                 | -.7253478 | .3697329 | -1.96 | 0.050 | -1.451094 | .0003984  |

Model 1B:

| HAZ                    | Coef.     | Linearized Std. Err. | t      | P> t  | [95% Conf. Interval] |           |
|------------------------|-----------|----------------------|--------|-------|----------------------|-----------|
| Current method         |           |                      |        |       |                      |           |
| None or folkloric      | 0         | (base)               |        |       |                      |           |
| Traditional            | .1103493  | .0389104             | 2.84   | 0.005 | .0339724             | .1867262  |
| Modern                 | .1015471  | .027303              | 3.72   | 0.000 | .0479541             | .15514    |
| Method prior           |           |                      |        |       |                      |           |
| None or folkloric      | 0         | (base)               |        |       |                      |           |
| Traditional            | .0922166  | .0389465             | 2.37   | 0.018 | .0157689             | .1686643  |
| Modern                 | .0954721  | .0268876             | 3.55   | 0.000 | .0426946             | .1482495  |
| Child sex              |           |                      |        |       |                      |           |
| Male                   | -.0152405 | .0201744             | -0.76  | 0.450 | -.0548407            | .0243596  |
| Child age: Spline 1    | -.1054394 | .0047732             | -22.09 | 0.000 | -.1148086            | -.0960702 |
| Child age: Spline 2    | .4847697  | .0275748             | 17.58  | 0.000 | .4306433             | .5388961  |
| Child age: Spline 3    | -1.261863 | .0822797             | -15.34 | 0.000 | -1.423369            | -1.100356 |
| Child age: Spline 4    | 1.190734  | .1041271             | 11.44  | 0.000 | .9863437             | 1.395124  |
| Mother age: Spline 1   | -.0028259 | .0109626             | -0.26  | 0.797 | -.0243443            | .0186924  |
| Mother age: Spline 2   | .0188868  | .0870796             | 0.22   | 0.828 | -.1520412            | .1898148  |
| Mother age: Spline 3   | -.0780209 | .3045816             | -0.26  | 0.798 | -.6758821            | .5198402  |
| Mother age: Spline 4   | .1117886  | .3492652             | 0.32   | 0.749 | -.5737819            | .797359   |
| Maternal education     |           |                      |        |       |                      |           |
| No education           | 0         | (base)               |        |       |                      |           |
| Incomplete primary     | .0350125  | .0470799             | 0.74   | 0.457 | -.0574002            | .1274252  |
| Complete primary       | .1415199  | .0530149             | 2.67   | 0.008 | .0374573             | .2455825  |
| Incomplete secondary   | .191268   | .0564561             | 3.39   | 0.001 | .0804507             | .3020853  |
| Complete secondary     | .1648404  | .0668087             | 2.47   | 0.014 | .0337021             | .2959787  |
| Higher                 | .036343   | .0906348             | 0.40   | 0.689 | -.1415635            | .2142495  |
| Paternal education     |           |                      |        |       |                      |           |
| No education           | 0         | (base)               |        |       |                      |           |
| Incomplete primary     | .0644083  | .0405075             | 1.59   | 0.112 | -.0151037            | .1439202  |
| Complete primary       | .1591843  | .0449085             | 3.54   | 0.000 | .0710337             | .247335   |
| Incomplete secondary   | .2163043  | .0485848             | 4.45   | 0.000 | .1209374             | .3116711  |
| Complete secondary     | .2892365  | .0603871             | 4.79   | 0.000 | .1707032             | .4077699  |
| Higher                 | .3740162  | .0793104             | 4.72   | 0.000 | .2183383             | .5296941  |
| Missing                | .2272545  | .2190948             | 1.04   | 0.300 | -.2028052            | .6573142  |
| Wealth index: Spline 1 | 3.30e-06  | 1.34e-06             | 2.46   | 0.014 | 6.66e-07             | 5.93e-06  |
| Wealth index: Spline 2 | .0000103  | .0000172             | 0.60   | 0.547 | -.0000234            | .000044   |
| Wealth index: Spline 3 | -.0000287 | .0000402             | -0.71  | 0.475 | -.0001077            | .0000503  |
| Wealth index: Spline 4 | .0000268  | .0000325             | 0.82   | 0.410 | -.000037             | .0000905  |

|                       |           |          |       |       |           |           |
|-----------------------|-----------|----------|-------|-------|-----------|-----------|
| Maternal Literacy     |           |          |       |       |           |           |
| Not literate          | 0         | (base)   |       |       |           |           |
| Semi-literate         | .1311569  | .0496269 | 2.64  | 0.008 | .0337447  | .2285692  |
| Literate              | .0693309  | .0477956 | 1.45  | 0.147 | -.0244868 | .1631485  |
| Region                |           |          |       |       |           |           |
| metropolitana         | 0         | (base)   |       |       |           |           |
| norte                 | .2525059  | .0799788 | 3.16  | 0.002 | .095516   | .4094958  |
| nororiental           | .0525636  | .0658498 | 0.80  | 0.425 | -.0766925 | .1818197  |
| suroriental           | -.0615479 | .0560928 | -1.10 | 0.273 | -.171652  | .0485563  |
| central               | -.1015673 | .0505702 | -2.01 | 0.045 | -.2008312 | -.0023035 |
| suroccidental         | -.1839533 | .0447326 | -4.11 | 0.000 | -.2717586 | -.096148  |
| noroccidental         | -.2680866 | .0611569 | -4.38 | 0.000 | -.388131  | -.1480422 |
| petEn                 | .3951212  | .057324  | 6.89  | 0.000 | .2826003  | .507642   |
| Rural or urban        |           |          |       |       |           |           |
| urban                 | 0         | (base)   |       |       |           |           |
| rural                 | .0509141  | .0339828 | 1.50  | 0.134 | -.0157904 | .1176187  |
| Ethnicity             |           |          |       |       |           |           |
| Indigenous            | -.1821777 | .0327233 | -5.57 | 0.000 | -.24641   | -.1179453 |
| Marital status        |           |          |       |       |           |           |
| Never in union        | 0         | (base)   |       |       |           |           |
| Current partner       | -.07856   | .224884  | -0.35 | 0.727 | -.5199833 | .3628632  |
| Formerly had partner  | .0686949  | .2194465 | 0.31  | 0.754 | -.3620551 | .499445   |
| Diarrhea              |           |          |       |       |           |           |
| Diarrhea last 2 weeks | .0596247  | .0297158 | 2.01  | 0.045 | .0012959  | .1179536  |
| language              |           |          |       |       |           |           |
| Indigenous language   | -.2025057 | .0464782 | -4.36 | 0.000 | -.2937375 | -.1112739 |
| _cons                 | -.6796019 | .3684975 | -1.84 | 0.066 | -1.402923 | .0437194  |

## Model 1C

| HAZ                     | Coef.     | Linearized Std. Err. | t      | P> t  | [95% Conf. Interval] |           |
|-------------------------|-----------|----------------------|--------|-------|----------------------|-----------|
| Current method duration |           |                      |        |       |                      |           |
| None or folkloric       | 0         | (base)               |        |       |                      |           |
| Traditional             | .1163098  | .0387077             | 3.00   | 0.003 | .0403308             | .1922889  |
| Modern, <15 months      | .0179315  | .0329476             | 0.54   | 0.586 | -.0467412            | .0826042  |
| Modern, 15+ months      | .1982897  | .0322742             | 6.14   | 0.000 | .1349389             | .2616405  |
| Method prior            |           |                      |        |       |                      |           |
| None or folkloric       | 0         | (base)               |        |       |                      |           |
| Traditional             | .1074334  | .0389791             | 2.76   | 0.006 | .0309217             | .1839452  |
| Modern                  | .1134376  | .0269662             | 4.21   | 0.000 | .0605058             | .1663695  |
| Child sex               |           |                      |        |       |                      |           |
| Male                    | -.0150201 | .020208              | -0.74  | 0.458 | -.0546862            | .024646   |
| Child age: Spline 1     | -.1056312 | .0047423             | -22.27 | 0.000 | -.1149399            | -.0963225 |
| Child age: Spline 2     | .4712375  | .0272155             | 17.32  | 0.000 | .4178163             | .5246587  |
| Child age: Spline 3     | -1.215065 | .0813606             | -14.93 | 0.000 | -1.374767            | -1.055362 |
| Child age: Spline 4     | 1.131548  | .1036733             | 10.91  | 0.000 | .9280486             | 1.335048  |
| Mother age: Spline 1    | -.0024754 | .0108667             | -0.23  | 0.820 | -.0238055            | .0188547  |
| Mother age: Spline 2    | .0065996  | .0865527             | 0.08   | 0.939 | -.1632942            | .1764933  |
| Mother age: Spline 3    | -.0380759 | .3034389             | -0.13  | 0.900 | -.6336942            | .5575424  |
| Mother age: Spline 4    | .0745868  | .3486809             | 0.21   | 0.831 | -.6098366            | .7590102  |

|                        |           |          |       |       |           |           |
|------------------------|-----------|----------|-------|-------|-----------|-----------|
| Maternal education     |           |          |       |       |           |           |
| No education           | 0         | (base)   |       |       |           |           |
| Incomplete primary     | .0356453  | .0472893 | 0.75  | 0.451 | -.0571785 | .1284691  |
| Complete primary       | .1432782  | .0533829 | 2.68  | 0.007 | .0384933  | .2480631  |
| Incomplete secondary   | .1971216  | .0565086 | 3.49  | 0.001 | .0862013  | .308042   |
| Complete secondary     | .1732884  | .0673791 | 2.57  | 0.010 | .0410304  | .3055465  |
| Higher                 | .0488132  | .0903492 | 0.54  | 0.589 | -.1285326 | .226159   |
| Paternal education     |           |          |       |       |           |           |
| No education           | 0         | (base)   |       |       |           |           |
| Incomplete primary     | .0635725  | .0406598 | 1.56  | 0.118 | -.0162384 | .1433835  |
| Complete primary       | .1569125  | .0449145 | 3.49  | 0.001 | .0687502  | .2450748  |
| Incomplete secondary   | .2140789  | .0484619 | 4.42  | 0.000 | .1189533  | .3092045  |
| Complete secondary     | .2817726  | .0600371 | 4.69  | 0.000 | .1639262  | .3996191  |
| Higher                 | .370392   | .0784557 | 4.72  | 0.000 | .2163918  | .5243922  |
| Missing                | .2366697  | .2168101 | 1.09  | 0.275 | -.1889054 | .6622448  |
| Wealth index: Spline 1 | 3.31e-06  | 1.34e-06 | 2.48  | 0.013 | 6.89e-07  | 5.93e-06  |
| Wealth index: Spline 2 | 9.12e-06  | .0000171 | 0.53  | 0.595 | -.0000245 | .0000428  |
| Wealth index: Spline 3 | -.0000255 | .0000402 | -0.64 | 0.525 | -.0001043 | .0000533  |
| Wealth index: Spline 4 | .0000238  | .0000324 | 0.73  | 0.463 | -.0000397 | .0000873  |
| Maternal Literacy      |           |          |       |       |           |           |
| Not literate           | 0         | (base)   |       |       |           |           |
| Semi-literate          | .1294599  | .0498202 | 2.60  | 0.010 | .0316682  | .2272516  |
| Literate               | .0634793  | .0478016 | 1.33  | 0.185 | -.0303502 | .1573087  |
| Region                 |           |          |       |       |           |           |
| metropolitana          | 0         | (base)   |       |       |           |           |
| norte                  | .251501   | .0804394 | 3.13  | 0.002 | .093607   | .409395   |
| nororiental            | .0512248  | .0656366 | 0.78  | 0.435 | -.0776128 | .1800624  |
| suroriental            | -.0598625 | .0560991 | -1.07 | 0.286 | -.1699791 | .0502541  |
| central                | -.096976  | .0506262 | -1.92 | 0.056 | -.1963498 | .0023978  |
| suroccidental          | -.18133   | .0447297 | -4.05 | 0.000 | -.2691297 | -.0935304 |
| noroccidental          | -.2668419 | .0611087 | -4.37 | 0.000 | -.3867919 | -.146892  |
| petEn                  | .3888047  | .0577036 | 6.74  | 0.000 | .2755386  | .5020707  |
| Rural or urban         |           |          |       |       |           |           |
| urban                  | 0         | (base)   |       |       |           |           |
| rural                  | .0492273  | .0341321 | 1.44  | 0.150 | -.0177704 | .116225   |
| Ethnicity              |           |          |       |       |           |           |
| Indigenous             | -.1805182 | .0326311 | -5.53 | 0.000 | -.2445695 | -.1164668 |
| Marital status         |           |          |       |       |           |           |
| Never in union         | 0         | (base)   |       |       |           |           |
| Current partner        | -.0676426 | .2227174 | -0.30 | 0.761 | -.5048132 | .369528   |
| Formerly had partner   | .0813559  | .2173025 | 0.37  | 0.708 | -.3451858 | .5078976  |
| Diarrhea               |           |          |       |       |           |           |
| Diarrhea last 2 weeks  | .0559771  | .0298013 | 1.88  | 0.061 | -.0025198 | .1144739  |
| language               |           |          |       |       |           |           |
| Indigenous language    | -.2005675 | .0461466 | -4.35 | 0.000 | -.2911483 | -.1099867 |
| _cons                  | -.6566571 | .366243  | -1.79 | 0.073 | -1.375553 | .0622388  |

Model ID:

| HAZ                     | Coef. | Linearized Std. Err. | t | P> t | [95% Conf. Interval] |
|-------------------------|-------|----------------------|---|------|----------------------|
| Current method duration |       |                      |   |      |                      |

|                        |           |          |        |       |           |           |
|------------------------|-----------|----------|--------|-------|-----------|-----------|
| None or folkloric      | 0         | (base)   |        |       |           |           |
| Traditional            | .1166987  | .0389429 | 3.00   | 0.003 | .0402579  | .1931394  |
| Modern, <15 months     | .0225894  | .0329246 | 0.69   | 0.493 | -.0420381 | .087217   |
| Modern, 15+ months     | .2136212  | .0318983 | 6.70   | 0.000 | .1510082  | .2762341  |
| Method prior           |           |          |        |       |           |           |
| None or folkloric      | 0         | (base)   |        |       |           |           |
| Traditional            | .1135981  | .0383521 | 2.96   | 0.003 | .0383171  | .1888792  |
| Modern                 | .1223868  | .0268274 | 4.56   | 0.000 | .0697276  | .1750461  |
| birth_order_number     | -.0371225 | .0091092 | -4.08  | 0.000 | -.0550029 | -.019242  |
| ant_birth_interval_cat |           |          |        |       |           |           |
| <24 months             | -.1795951 | .0400326 | -4.49  | 0.000 | -.2581748 | -.1010154 |
| >= 24 months           | -.1113712 | .0314998 | -3.54  | 0.000 | -.1732019 | -.0495404 |
| No preceding birth     | 0         | (base)   |        |       |           |           |
| Child sex              |           |          |        |       |           |           |
| Male                   | -.0175694 | .0200552 | -0.88  | 0.381 | -.0569356 | .0217968  |
| Child age: Spline 1    | -.1070204 | .0047895 | -22.34 | 0.000 | -.1164217 | -.0976191 |
| Child age: Spline 2    | .4723683  | .0273577 | 17.27  | 0.000 | .418668   | .5260687  |
| Child age: Spline 3    | -1.217166 | .0816164 | -14.91 | 0.000 | -1.37737  | -1.056962 |
| Child age: Spline 4    | 1.131767  | .1035916 | 10.93  | 0.000 | .9284278  | 1.335106  |
| Mother age: Spline 1   | .0133682  | .011393  | 1.17   | 0.241 | -.0089951 | .0357315  |
| Mother age: Spline 2   | .0009846  | .0869334 | 0.01   | 0.991 | -.1696565 | .1716257  |
| Mother age: Spline 3   | -.0465822 | .3040882 | -0.15  | 0.878 | -.6434749 | .5503105  |
| Mother age: Spline 4   | .1092713  | .3495462 | 0.31   | 0.755 | -.5768507 | .7953933  |
| Maternal education     |           |          |        |       |           |           |
| No education           | 0         | (base)   |        |       |           |           |
| Incomplete primary     | .0305441  | .0469836 | 0.65   | 0.516 | -.0616797 | .1227679  |
| Complete primary       | .1238691  | .0534981 | 2.32   | 0.021 | .018858   | .2288801  |
| Incomplete secondary   | .1638845  | .0556268 | 2.95   | 0.003 | .054695   | .2730739  |
| Complete secondary     | .1173887  | .0674048 | 1.74   | 0.082 | -.0149198 | .2496972  |
| Higher                 | -.0307197 | .0894726 | -0.34  | 0.731 | -.2063448 | .1449054  |
| Paternal education     |           |          |        |       |           |           |
| No education           | 0         | (base)   |        |       |           |           |
| Incomplete primary     | .0579351  | .040595  | 1.43   | 0.154 | -.0217486 | .1376187  |
| Complete primary       | .1398775  | .0448697 | 3.12   | 0.002 | .051803   | .2279519  |
| Incomplete secondary   | .1893224  | .0483602 | 3.91   | 0.000 | .0943964  | .2842484  |
| Complete secondary     | .2550182  | .0604863 | 4.22   | 0.000 | .1362901  | .3737464  |
| Higher                 | .3408014  | .078709  | 4.33   | 0.000 | .1863039  | .4952988  |
| Missing                | .2158817  | .2185283 | 0.99   | 0.324 | -.2130661 | .6448295  |
| Wealth index: Spline 1 | 3.29e-06  | 1.33e-06 | 2.47   | 0.014 | 6.75e-07  | 5.90e-06  |
| Wealth index: Spline 2 | 7.05e-06  | .0000171 | 0.41   | 0.680 | -.0000265 | .0000406  |
| Wealth index: Spline 3 | -.0000209 | .00004   | -0.52  | 0.600 | -.0000994 | .0000575  |
| Wealth index: Spline 4 | .0000208  | .0000322 | 0.65   | 0.517 | -.0000423 | .000084   |
| Maternal Literacy      |           |          |        |       |           |           |
| Not literate           | 0         | (base)   |        |       |           |           |
| Semi-literate          | .1168495  | .0506464 | 2.31   | 0.021 | .0174361  | .2162629  |
| Literate               | .0476243  | .0482118 | 0.99   | 0.324 | -.0470104 | .142259   |
| Region                 |           |          |        |       |           |           |
| metropolitana          | 0         | (base)   |        |       |           |           |
| norte                  | .246735   | .0809016 | 3.05   | 0.002 | .0879338  | .4055362  |
| nororiental            | .0564199  | .0660488 | 0.85   | 0.393 | -.0732269 | .1860668  |
| suroriental            | -.0640409 | .0558115 | -1.15  | 0.252 | -.1735929 | .0455112  |
| central                | -.0971845 | .0510282 | -1.90  | 0.057 | -.1973474 | .0029784  |
| suroccidental          | -.1827254 | .0448307 | -4.08  | 0.000 | -.2707233 | -.0947275 |
| noroccidental          | -.2653872 | .0620476 | -4.28  | 0.000 | -.3871799 | -.1435944 |
| pet n                  | .3930161  | .0578208 | 6.80   | 0.000 | .2795201  | .5065121  |

|                       |           |          |       |       |           |           |
|-----------------------|-----------|----------|-------|-------|-----------|-----------|
| Rural or urban        | 0 (base)  |          |       |       |           |           |
| urban                 | .0482019  | .0341772 | 1.41  | 0.159 | -.0188843 | .1152882  |
| rural                 |           |          |       |       |           |           |
| Ethnicity             |           |          |       |       |           |           |
| Indigenous            | -.1769919 | .0324946 | -5.45 | 0.000 | -.2407754 | -.1132084 |
| Marital status        | 0 (base)  |          |       |       |           |           |
| Never in union        | -.0205614 | .2252452 | -0.09 | 0.927 | -.4626937 | .421571   |
| Current partner       | .1149221  | .2199739 | 0.52  | 0.602 | -.3168632 | .5467075  |
| Formerly had partner  |           |          |       |       |           |           |
| Diarrhea              |           |          |       |       |           |           |
| Diarrhea last 2 weeks | .0580342  | .0298005 | 1.95  | 0.052 | -.0004611 | .1165295  |
| language              |           |          |       |       |           |           |
| Indigenous language   | -.2057576 | .0458019 | -4.49 | 0.000 | -.2956618 | -.1158534 |
| _cons                 | -.8419261 | .3705811 | -2.27 | 0.023 | -1.569337 | -.1145148 |

## Model 2A

| Stunted                 | IRR      | Linearized<br>Std. Err. | t      | P> t  | [95% Conf. Interval] |          |
|-------------------------|----------|-------------------------|--------|-------|----------------------|----------|
| Current method duration | 1 (base) |                         |        |       |                      |          |
| None or folkloric       |          |                         |        |       |                      |          |
| Traditional             | .9328999 | .041227                 | -1.57  | 0.116 | .8553861             | 1.017438 |
| Modern, <15 months      | 1.012191 | .0415058                | 0.30   | 0.768 | .9339118             | 1.097031 |
| Modern, 15+ months      | .8749756 | .0330205                | -3.54  | 0.000 | .8125024             | .9422523 |
| Method prior            | 1 (base) |                         |        |       |                      |          |
| None or folkloric       |          |                         |        |       |                      |          |
| Traditional             | .8898078 | .0427152                | -2.43  | 0.015 | .8097915             | .9777306 |
| Modern                  | .9226536 | .0294662                | -2.52  | 0.012 | .8665902             | .982344  |
| Child sex               |          |                         |        |       |                      |          |
| Male                    | .9981576 | .0240958                | -0.08  | 0.939 | .9519633             | 1.046593 |
| Child age: Spline 1     | 1.147278 | .0092394                | 17.06  | 0.000 | 1.129284             | 1.165558 |
| Child age: Spline 2     | .5583597 | .0212496                | -15.31 | 0.000 | .5181689             | .6016679 |
| Child age: Spline 3     | 4.361083 | .4574102                | 14.04  | 0.000 | 3.54963              | 5.358037 |
| Child age: Spline 4     | .266644  | .0314163                | -11.22 | 0.000 | .2115887             | .3360248 |
| Mother age: Spline 1    | 1.01197  | .0146406                | 0.82   | 0.411 | .9836367             | 1.04112  |
| Mother age: Spline 2    | .9038194 | .0956332                | -0.96  | 0.339 | .7343132             | 1.112454 |
| Mother age: Spline 3    | 1.434583 | .5097398                | 1.02   | 0.310 | .7142041             | 2.881568 |
| Mother age: Spline 4    | .6696236 | .260711                 | -1.03  | 0.303 | .311838              | 1.437913 |
| Maternal education      | 1 (base) |                         |        |       |                      |          |
| No education            |          |                         |        |       |                      |          |
| Incomplete primary      | .9245653 | .0416069                | -1.74  | 0.082 | .8463985             | 1.009951 |
| Complete primary        | .7764337 | .0488322                | -4.02  | 0.000 | .6862617             | .8784539 |
| Incomplete secondary    | .7121522 | .0549524                | -4.40  | 0.000 | .6120581             | .8286153 |
| Complete secondary      | .797104  | .0832392                | -2.17  | 0.030 | .6493721             | .9784447 |
| Higher                  | .6903204 | .1268405                | -2.02  | 0.044 | .4813001             | .9901146 |
| Paternal education      | 1 (base) |                         |        |       |                      |          |
| No education            |          |                         |        |       |                      |          |
| Incomplete primary      | .9582091 | .0297854                | -1.37  | 0.170 | .9014914             | 1.018495 |
| Complete primary        | .9131667 | .0396738                | -2.09  | 0.037 | .8385194             | .9944593 |
| Incomplete secondary    | .8197172 | .0485059                | -3.36  | 0.001 | .7298268             | .920679  |
| Complete secondary      | .6779779 | .0616789                | -4.27  | 0.000 | .5671029             | .8105302 |
| Higher                  | .7128195 | .1124964                | -2.15  | 0.032 | .5229294             | .971664  |

|                        |          |          |       |       |          |          |
|------------------------|----------|----------|-------|-------|----------|----------|
| Missing                | 1.063175 | .2147334 | 0.30  | 0.762 | .7151996 | 1.580454 |
| Wealth index: Spline 1 | .9999979 | 1.00e-06 | -2.07 | 0.039 | .9999996 | .9999999 |
| Wealth index: Spline 2 | .9999877 | .0000164 | -0.75 | 0.456 | .9999555 | 1.00002  |
| Wealth index: Spline 3 | 1.000023 | .0000419 | 0.56  | 0.578 | .999941  | 1.000106 |
| Wealth index: Spline 4 | .9999857 | .0000395 | -0.36 | 0.717 | .999908  | 1.000063 |
| Maternal Literacy      |          |          |       |       |          |          |
| Not literate           | 1        | (base)   |       |       |          |          |
| Semi-literate          | .9841694 | .0475299 | -0.33 | 0.741 | .8951589 | 1.082031 |
| Literate               | 1.050414 | .0512834 | 1.01  | 0.314 | .9544234 | 1.156059 |
| Region                 |          |          |       |       |          |          |
| metropolitana          | 1        | (base)   |       |       |          |          |
| norte                  | .8942517 | .096157  | -1.04 | 0.299 | .7240942 | 1.104395 |
| nororiente             | 1.05239  | .1080992 | 0.50  | 0.619 | .8602258 | 1.287481 |
| suroriente             | 1.169861 | .1083458 | 1.69  | 0.091 | .975401  | 1.40309  |
| central                | 1.24418  | .1093738 | 2.49  | 0.013 | 1.046993 | 1.478505 |
| suroccidente           | 1.32017  | .1135557 | 3.23  | 0.001 | 1.115074 | 1.56299  |
| noroccidente           | 1.301392 | .1221737 | 2.81  | 0.005 | 1.082377 | 1.564723 |
| petEn                  | .7645364 | .0751074 | -2.73 | 0.006 | .6304518 | .9271381 |
| Rural or urban         |          |          |       |       |          |          |
| urban                  | 1        | (base)   |       |       |          |          |
| rural                  | .944827  | .034907  | -1.54 | 0.125 | .8787338 | 1.015891 |
| Ethnicity              |          |          |       |       |          |          |
| Indigenous             | 1.223458 | .0499713 | 4.94  | 0.000 | 1.129198 | 1.325585 |
| Marital status         |          |          |       |       |          |          |
| Never in union         | 1        | (base)   |       |       |          |          |
| Current partner        | 1.414501 | .3011366 | 1.63  | 0.104 | .9313611 | 2.148269 |
| Formerly had partner   | 1.284493 | .2597571 | 1.24  | 0.216 | .8636542 | 1.910397 |
| Diarrhea               |          |          |       |       |          |          |
| Diarrhea last 2 weeks  | .9816709 | .032857  | -0.55 | 0.581 | .919249  | 1.048331 |
| language               |          |          |       |       |          |          |
| Indigenous language    | 1.157584 | .0512192 | 3.31  | 0.001 | 1.061288 | 1.262616 |
| _cons                  | .0497515 | .0196101 | -7.61 | 0.000 | .0229506 | .1078495 |

## Model 2B

| Severe stunted          | IRR      | Linearized Std. Err. | t      | P> t  | [95% Conf. Interval] |
|-------------------------|----------|----------------------|--------|-------|----------------------|
| Current method duration |          |                      |        |       |                      |
| None or folkloric       | 1        | (base)               |        |       |                      |
| Traditional             | .8392504 | .0862571             | -1.71  | 0.089 | .6859231 1.026852    |
| Modern, <15 months      | .9309835 | .0768322             | -0.87  | 0.386 | .7917518 1.0947      |
| Modern, 15+ months      | .6066651 | .0581278             | -5.22  | 0.000 | .5026539 .7321987    |
| Method prior            |          |                      |        |       |                      |
| None or folkloric       | 1        | (base)               |        |       |                      |
| Traditional             | .7137948 | .0706891             | -3.40  | 0.001 | .5876929 .8669544    |
| Modern                  | .794928  | .0575065             | -3.17  | 0.002 | .689697 .9162147     |
| Child sex               |          |                      |        |       |                      |
| Male                    | 1.005594 | .0556635             | 0.10   | 0.920 | .9020589 1.121012    |
| Child age: Spline 1     | 1.270901 | .0246087             | 12.38  | 0.000 | 1.223504 1.320135    |
| Child age: Spline 2     | .3714861 | .0323475             | -11.37 | 0.000 | .3131213 .44073      |



|                        |          |          |       |       |          |          |
|------------------------|----------|----------|-------|-------|----------|----------|
| Child age: Spline 3    | 11.79388 | 2.751101 | 10.58 | 0.000 | 7.461128 | 18.64272 |
| Child age: Spline 4    | .1167925 | .0296469 | -8.46 | 0.000 | .0709611 | .1922246 |
| Mother age: Spline 1   | .9839426 | .0329506 | -0.48 | 0.629 | .921344  | 1.050794 |
| Mother age: Spline 2   | 1.301007 | .3119129 | 1.10  | 0.273 | .8126458 | 2.08285  |
| Mother age: Spline 3   | .4106408 | .3278755 | -1.11 | 0.265 | .0856655 | 1.968423 |
| Mother age: Spline 4   | 2.389217 | 2.054046 | 1.01  | 0.311 | .4419477 | 12.91636 |
| Maternal education     |          |          |       |       |          |          |
| No education           | 1        | (base)   |       |       |          |          |
| Incomplete primary     | .9373759 | .0797913 | -0.76 | 0.448 | .7931394 | 1.107843 |
| Complete primary       | .7122443 | .0954174 | -2.53 | 0.011 | .5475521 | .9264724 |
| Incomplete secondary   | .6133594 | .101701  | -2.95 | 0.003 | .4429621 | .8493047 |
| Complete secondary     | .5102681 | .1337213 | -2.57 | 0.010 | .3050693 | .8534899 |
| Higher                 | .945368  | .394662  | -0.13 | 0.893 | .4166    | 2.145272 |
| Paternal education     |          |          |       |       |          |          |
| No education           | 1        | (base)   |       |       |          |          |
| Incomplete primary     | .9442337 | .068     | -0.80 | 0.426 | .8197617 | 1.087605 |
| Complete primary       | .8342584 | .0822415 | -1.84 | 0.066 | .6874854 | 1.012366 |
| Incomplete secondary   | .7443619 | .1001206 | -2.19 | 0.028 | .571639  | .9692736 |
| Complete secondary     | .8341412 | .1647484 | -0.92 | 0.359 | .5660703 | 1.229161 |
| Higher                 | .5584609 | .2441698 | -1.33 | 0.183 | .2367418 | 1.317379 |
| Missing                | .8798822 | .5991978 | -0.19 | 0.851 | .2311489 | 3.349325 |
| Wealth index: Spline 1 | .9999967 | 2.43e-06 | -1.35 | 0.176 | .999992  | 1.000001 |
| Wealth index: Spline 2 | .9999832 | .0000372 | -0.45 | 0.652 | .9999102 | 1.000056 |
| Wealth index: Spline 3 | 1.000015 | .0000971 | 0.15  | 0.880 | .9998241 | 1.000205 |
| Wealth index: Spline 4 | 1.000019 | .0000968 | 0.20  | 0.841 | .9998294 | 1.000209 |
| Maternal Literacy      |          |          |       |       |          |          |
| Not literate           | 1        | (base)   |       |       |          |          |
| Semi-literate          | .8336295 | .085653  | -1.77 | 0.077 | .6813714 | 1.019911 |
| Literate               | .9618646 | .0909112 | -0.41 | 0.681 | .7989909 | 1.15794  |
| Region                 |          |          |       |       |          |          |
| metropolitana          | 1        | (base)   |       |       |          |          |
| norte                  | .9415956 | .2559688 | -0.22 | 0.825 | .5522338 | 1.605483 |
| nororient              | 1.524393 | .4104816 | 1.57  | 0.118 | .8985592 | 2.586111 |
| surorient              | 1.780875 | .4518732 | 2.27  | 0.023 | 1.082255 | 2.93047  |
| central                | 1.515512 | .3895433 | 1.62  | 0.106 | .9150436 | 2.510019 |
| suroccidente           | 1.857053 | .4496952 | 2.56  | 0.011 | 1.154498 | 2.987138 |
| noroccidente           | 1.873418 | .4713894 | 2.49  | 0.013 | 1.143234 | 3.06997  |
| petEn                  | .5704913 | .1689922 | -1.89 | 0.058 | .3189535 | 1.020401 |
| Rural or urban         |          |          |       |       |          |          |
| urban                  | 1        | (base)   |       |       |          |          |
| rural                  | 1.076438 | .0987893 | 0.80  | 0.422 | .8989876 | 1.288914 |
| Ethnicity              |          |          |       |       |          |          |
| Indigenous             | 1.317971 | .1274795 | 2.85  | 0.004 | 1.090062 | 1.593531 |
| Marital status         |          |          |       |       |          |          |
| Never in union         | 1        | (base)   |       |       |          |          |
| Current partner        | 1.183601 | .851894  | 0.23  | 0.815 | .2881636 | 4.861512 |
| Formerly had partner   | .8207678 | .5900323 | -0.27 | 0.784 | .2001683 | 3.365467 |
| Diarrhea               |          |          |       |       |          |          |
| Diarrhea last 2 weeks  | 1.013406 | .0764558 | 0.18  | 0.860 | .8739149 | 1.175163 |
| language               |          |          |       |       |          |          |
| Indigenous language    | 1.228431 | .1295886 | 1.95  | 0.051 | .9986704 | 1.511051 |
| _cons                  | .0068571 | .0069515 | -4.91 | 0.000 | .0009374 | .0501594 |
