# Supplementary material for: Associations between contraception and stunting in Guatemala: secondary analysis of the 2014–2015 Demographic and Health Survey
Source: PubMed Central journal article supplement — BMJ Paediatr Open. 2019 Aug 22;3(1):e000510. doi: 10.1136/bmjpo-2019-000510 (PMC6721081; doi:10.1136/bmjpo-2019-000510), 2019-08-22
Supplement: bmjpo-2019-000510supp002.pdf [file bmjpo-2019-000510supp002.pdf]

**Supplementary File 2: Selected results of sensitivity analysis**

Page 1: Sensitivity analysis 1 (Inclusion of maternal height). Model 1C and the Poisson model for stunting (2A) shown.

Page 3: Sensitivity analysis 2 (Inclusion of health care access variables). Model 1C and the Poisson model for stunting (2A) shown.

Page 9: Sensitivity analysis 3: (Inclusion of feeding indicators). Model 1C and the Poisson model for stunting (2A) shown.

## SENSITIVITY ANALYSIS 1: INCLUSION OF MATERNAL HEIGHT

Model 1C:

| haz                     | Coef.     | Linearized<br>Std. Err. | t      | P> t  | [95% Conf. Interval] |           |
|-------------------------|-----------|-------------------------|--------|-------|----------------------|-----------|
| Method current duration |           |                         |        |       |                      |           |
| None or folkloric       | 0         | (base)                  |        |       |                      |           |
| Traditional             | .0828215  | .0383321                | 2.16   | 0.031 | .0075797             | .1580634  |
| Modern, <15 months      | -.0099689 | .0321823                | -0.31  | 0.757 | -.0731394            | .0532015  |
| Modern, 15+ months      | .1628285  | .0330641                | 4.92   | 0.000 | .0979273             | .2277298  |
| Prior method            |           |                         |        |       |                      |           |
| None or folkloric       | 0         | (base)                  |        |       |                      |           |
| Traditional             | .0808978  | .0386124                | 2.10   | 0.036 | .0051059             | .1566898  |
| Modern                  | .0923037  | .026018                 | 3.55   | 0.000 | .0412331             | .1433743  |
| Maternal height         | .0591105  | .0023173                | 25.51  | 0.000 | .0545619             | .0636592  |
| Child sex               |           |                         |        |       |                      |           |
| male                    | -.0181955 | .0203327                | -0.89  | 0.371 | -.0581063            | .0217154  |
| Child age: Spline 1     | -.1030885 | .0047464                | -21.72 | 0.000 | -.1124052            | -.0937717 |
| Child age: Spline 2     | .4563764  | .0267942                | 17.03  | 0.000 | .4037821             | .5089706  |
| Child age: Spline 3     | -1.176262 | .0795339                | -14.79 | 0.000 | -1.332379            | -1.020146 |
| Child age: Spline 4     | 1.094194  | .1012968                | 10.80  | 0.000 | .8953594             | 1.293029  |
| Mother age: Spline 1    | -.0028331 | .0107914                | -0.26  | 0.793 | -.0240154            | .0183493  |
| Mother age: Spline 2    | -.0031073 | .0860255                | -0.04  | 0.971 | -.1719662            | .1657516  |
| Mother age: Spline 3    | .0308981  | .3005511                | 0.10   | 0.918 | -.5590517            | .6208479  |
| Mother age: Spline 4    | -.0534912 | .3436003                | -0.16  | 0.876 | -.7279419            | .6209595  |
| Maternal education      |           |                         |        |       |                      |           |
| No education            | 0         | (base)                  |        |       |                      |           |
| Incomplete primary      | .0535684  | .0441148                | 1.21   | 0.225 | -.0330244            | .1401611  |
| Complete primary        | .1220872  | .0523067                | 2.33   | 0.020 | .0194148             | .2247597  |
| Incomplete secondary    | .1343054  | .0552716                | 2.43   | 0.015 | .0258131             | .2427977  |
| Complete secondary      | .1243386  | .067072                 | 1.85   | 0.064 | -.0073167            | .2559938  |
| Higher                  | -.0020645 | .090059                 | -0.02  | 0.982 | -.1788406            | .1747117  |
| Paternal education      |           |                         |        |       |                      |           |
| No education            | 0         | (base)                  |        |       |                      |           |
| Incomplete primary      | .0426493  | .0388873                | 1.10   | 0.273 | -.0336823            | .1189809  |
| Complete primary        | .1261663  | .0428735                | 2.94   | 0.003 | .0420102             | .2103224  |
| Incomplete secondary    | .1396516  | .0457162                | 3.05   | 0.002 | .0499154             | .2293877  |
| Complete secondary      | .186344   | .0588145                | 3.17   | 0.002 | .0708974             | .3017906  |
| Higher                  | .2905144  | .07469                  | 3.89   | 0.000 | .1439059             | .4371229  |
| Missing                 | .1928098  | .2556019                | 0.75   | 0.451 | -.3089094            | .6945291  |
| Wealth index: Spline 1  | 3.19e-06  | 1.28e-06                | 2.50   | 0.013 | 6.81e-07             | 5.70e-06  |
| Wealth index: Spline 2  | -2.88e-06 | .0000162                | -0.18  | 0.859 | -.0000346            | .0000289  |
| Wealth index: Spline 3  | 5.97e-06  | .0000378                | 0.16   | 0.874 | -.0000681            | .0000801  |
| Wealth index: Spline 4  | -6.04e-06 | .0000304                | -0.20  | 0.843 | -.0000658            | .0000537  |
| Maternal literacy       |           |                         |        |       |                      |           |
| Not literate            | 0         | (base)                  |        |       |                      |           |
| Semi-literate           | .0555965  | .0480634                | 1.16   | 0.248 | -.0387468            | .1499399  |
| Literate                | -.0055979 | .0458467                | -0.12  | 0.903 | -.0955901            | .0843944  |
| Region                  |           |                         |        |       |                      |           |
| metropolitana           | 0         | (base)                  |        |       |                      |           |
| norte                   | .1536683  | .0683883                | 2.25   | 0.025 | .0194294             | .2879073  |
| nororiental             | .0012608  | .0593786                | 0.02   | 0.983 | -.115293             | .1178146  |
| suroriental             | -.1415546 | .052056                 | -2.72  | 0.007 | -.243735             | -.0393741 |

|                       |           |          |        |       |           |           |
|-----------------------|-----------|----------|--------|-------|-----------|-----------|
| central               | -.0805888 | .0476305 | -1.69  | 0.091 | -.1740825 | .0129049  |
| suroccidente          | -.1524722 | .0430143 | -3.54  | 0.000 | -.2369048 | -.0680397 |
| noroccidente          | -.2637109 | .0565273 | -4.67  | 0.000 | -.3746679 | -.1527538 |
| petEn                 | .261967   | .0525765 | 4.98   | 0.000 | .1587649  | .3651691  |
| Rural or urban        |           |          |        |       |           |           |
| urban                 | 0         | (base)   |        |       |           |           |
| rural                 | .0276319  | .0304003 | 0.91   | 0.364 | -.0320405 | .0873044  |
| Ethnicity             |           |          |        |       |           |           |
| Indigenous            | -.0802691 | .0308467 | -2.60  | 0.009 | -.1408178 | -.0197204 |
| Marital status        |           |          |        |       |           |           |
| Never in union        | 0         | (base)   |        |       |           |           |
| Current partner       | -.0447689 | .256917  | -0.17  | 0.862 | -.5490696 | .4595319  |
| Formerly had partner  | .0743129  | .2540367 | 0.29   | 0.770 | -.424334  | .5729598  |
| diarrhea              |           |          |        |       |           |           |
| Diarrhea last 2 weeks | .0441847  | .028702  | 1.54   | 0.124 | -.0121544 | .1005237  |
| Language              |           |          |        |       |           |           |
| Indigenous language   | -.1483903 | .0423154 | -3.51  | 0.000 | -.2314509 | -.0653298 |
| _cons                 | -9.272564 | .525307  | -17.65 | 0.000 | -10.30369 | -8.241443 |

## Model 2A:

| haz_sev_stunted         | IRR      | Linearized<br>Std. Err. | t      | P> t  | [95% Conf. Interval] |          |
|-------------------------|----------|-------------------------|--------|-------|----------------------|----------|
| Method current duration |          |                         |        |       |                      |          |
| None or folkloric       | 1        | (base)                  |        |       |                      |          |
| Traditional             | .847348  | .0913044                | -1.54  | 0.125 | .6858121             | 1.046932 |
| Modern, <15 months      | .8755858 | .0733789                | -1.59  | 0.113 | .7427741             | 1.032145 |
| Modern, 15+ months      | .6016019 | .0594584                | -5.14  | 0.000 | .4955144             | .7304023 |
| Prior method            |          |                         |        |       |                      |          |
| None or folkloric       | 1        | (base)                  |        |       |                      |          |
| Traditional             | .7499991 | .0795429                | -2.71  | 0.007 | .6090454             | .9235743 |
| Modern                  | .8174482 | .060223                 | -2.74  | 0.006 | .7073866             | .9446342 |
| Maternal height         | .917066  | .0052369                | -15.16 | 0.000 | .9068438             | .9274034 |
| Child sex               |          |                         |        |       |                      |          |
| male                    | 1.029091 | .061708                 | 0.48   | 0.633 | .9148212             | 1.157634 |
| Child age: Spline 1     | 1.273988 | .0256308                | 12.04  | 0.000 | 1.224658             | 1.325305 |
| Child age: Spline 2     | .3706372 | .0339715                | -10.83 | 0.000 | .3096091             | .4436948 |
| Child age: Spline 3     | 11.78008 | 2.914875                | 9.97   | 0.000 | 7.247881             | 19.14631 |
| Child age: Spline 4     | .1183067 | .0323553                | -7.80  | 0.000 | .0691622             | .2023715 |
| Mother age: Spline 1    | .9809999 | .0344006                | -0.55  | 0.585 | .9157468             | 1.050903 |
| Mother age: Spline 2    | 1.332721 | .3331131                | 1.15   | 0.251 | .8159507             | 2.176781 |
| Mother age: Spline 3    | .3793163 | .3161591                | -1.16  | 0.245 | .0738698             | 1.947763 |
| Mother age: Spline 4    | 2.582762 | 2.326212                | 1.05   | 0.292 | .4408473             | 15.13145 |
| Maternal education      |          |                         |        |       |                      |          |
| No education            | 1        | (base)                  |        |       |                      |          |
| Incomplete primary      | .9087908 | .0866642                | -1.00  | 0.316 | .7536509             | 1.095866 |
| Complete primary        | .7142723 | .1035881                | -2.32  | 0.021 | .5373199             | .9494995 |
| Incomplete secondary    | .6679059 | .1168679                | -2.31  | 0.021 | .4737534             | .9416256 |
| Complete secondary      | .5842808 | .154255                 | -2.04  | 0.042 | .3479857             | .9810291 |
| Higher                  | .9858746 | .4278208                | -0.03  | 0.974 | .4206203             | 2.310751 |



|           |          |                                       |           |          |        |       |            |
|-----------|----------|---------------------------------------|-----------|----------|--------|-------|------------|
| 0025491   | .1477125 | Traditional                           | .0725817  | .0382755 | 1.90   | 0.058 | -.         |
| 0450901   | .0832755 | Modern, <15 months                    | .0190927  | .032698  | 0.58   | 0.559 | -.         |
| 0364804   | .165187  | Modern, 15+ months                    | .1008337  | .0327849 | 3.08   | 0.002 | .          |
|           |          | Prior method                          |           |          |        |       |            |
|           |          | None or folkloric                     | 0         | (base)   |        |       |            |
| 0422767   | .1882698 | Traditional                           | .1152733  | .0371883 | 3.10   | 0.002 | .          |
| 0461771   | .1517664 | Modern                                | .0989718  | .0268963 | 3.68   | 0.000 | .          |
|           |          | Place of delivery                     |           |          |        |       |            |
|           |          | respondent's home                     | 0         | (base)   |        |       |            |
| 0547295   | .1922214 | other home                            | .068746   | .0629048 | 1.09   | 0.275 | -.         |
| 1820342   | .3142575 | government hospital                   | .2481459  | .0336807 | 7.37   | 0.000 | .          |
| 0910552   | .255356  | second level (health centers, mate..) | .1732056  | .0418517 | 4.14   | 0.000 | .          |
| 1609129   | .8733794 | first level (health post, converge..) | .3562333  | .2634611 | 1.35   | 0.177 | -.         |
| 1.622208  |          | other public sector                   | 1.459564  | .0828591 | 17.62  | 0.000 | 1.29692    |
| 2814612   | .5126387 | private hospital/clinic               | .3970499  | .0588869 | 6.74   | 0.000 | .          |
| 5904684   | .8711264 | doctor's office                       | .140329   | .3723062 | 0.38   | 0.706 | -.         |
| 4860148   | .9775451 | family protection association (apr..) | .7317799  | .1252055 | 5.84   | 0.000 | .          |
| 2114429   | .4453133 | social security (igss)                | .3283781  | .0595729 | 5.51   | 0.000 | .          |
| 1395474   | .3587639 | other                                 | .1096082  | .1269328 | 0.86   | 0.388 | -.         |
|           |          | Antenatal visits                      |           |          |        |       |            |
|           |          | <4 antenatal visits                   | 0         | (base)   |        |       |            |
| 0295352   | .1045253 | 4+ antenatal visits                   | .037495   | .0341487 | 1.10   | 0.273 | -.         |
| -.1473185 |          | Missing data                          | -.22444   | .0392897 | -5.71  | 0.000 | - .3015614 |
|           |          | Distance problem health               |           |          |        |       |            |
|           |          | no problem                            | 0         | (base)   |        |       |            |
| 0653005   | .0476489 | big problem                           | -.0088258 | .0287711 | -0.31  | 0.759 | -.         |
|           |          | Money problem health                  |           |          |        |       |            |
|           |          | no problem                            | 0         | (base)   |        |       |            |
| 0887452   | .0216274 | big problem                           | -.0335589 | .0281148 | -1.19  | 0.233 | -.         |
|           |          | Child sex                             |           |          |        |       |            |
| 065075    | .0136616 | male                                  | -.0257067 | .0200563 | -1.28  | 0.200 | -.         |
| -.0950283 |          | Child age: Spline 1                   | -.1042883 | .0047175 | -22.11 | 0.000 | - .1135482 |
| 4339248   | .5395932 | Child age: Spline 2                   | .486759   | .0269165 | 18.08  | 0.000 | .          |
| -1.099398 |          | Child age: Spline 3                   | -1.256639 | .0801067 | -15.69 | 0.000 | -1.41388   |
| 1.365892  |          | Child age: Spline 4                   | 1.166348  | .1016581 | 11.47  | 0.000 | .9668041   |

|           |          |                        |           |          |       |       |           |
|-----------|----------|------------------------|-----------|----------|-------|-------|-----------|
| 019398    | .0232231 | Mother age: Spline 1   | .0019125  | .0108567 | 0.18  | 0.860 | -.        |
| 1887258   | .1438022 | Mother age: Spline 2   | -.0224618 | .0847035 | -0.27 | 0.791 | -.        |
| 5417223   | .6214981 | Mother age: Spline 3   | .0398879  | .2963025 | 0.13  | 0.893 | -.        |
| 6626539   | .6769792 | Mother age: Spline 4   | .0071627  | .3412394 | 0.02  | 0.983 | -.        |
|           |          | Maternal education     |           |          |       |       |           |
|           |          | No education           | 0         | (base)   |       |       |           |
| 0421671   | .139919  | Incomplete primary     | .0488759  | .0463821 | 1.05  | 0.292 | -.        |
| 0553126   | .2623788 | Complete primary       | .1588457  | .0527452 | 3.01  | 0.003 | .         |
| 0794494   | .297327  | Incomplete secondary   | .1883882  | .0554991 | 3.39  | 0.001 | .         |
| 0162877   | .2762413 | Complete secondary     | .1462645  | .0662169 | 2.21  | 0.027 | .         |
| 14698     | .2012721 | Higher                 | .027146   | .0887089 | 0.31  | 0.760 | -.        |
|           |          | Paternal education     |           |          |       |       |           |
|           |          | No education           | 0         | (base)   |       |       |           |
| 0312358   | .1275922 | Incomplete primary     | .0481782  | .0404576 | 1.19  | 0.234 | -.        |
| 0437408   | .2145471 | Complete primary       | .129144   | .0435088 | 2.97  | 0.003 | .         |
| 0753469   | .2646053 | Incomplete secondary   | .1699761  | .048209  | 3.53  | 0.000 | .         |
| 1097448   | .3432104 | Complete secondary     | .2264776  | .0594698 | 3.81  | 0.000 | .         |
| 140614    | .4487628 | Higher                 | .2946884  | .0784935 | 3.75  | 0.000 | .         |
| 2400284   | .6388703 | Missing                | .199421   | .2238784 | 0.89  | 0.373 | -.        |
| 5.07e-06  |          | Wealth index: Spline 1 | 2.54e-06  | 1.29e-06 | 1.97  | 0.050 | 2.94e-09  |
| 0000234   | .0000412 | Wealth index: Spline 2 | 8.90e-06  | .0000165 | 0.54  | 0.588 | -.        |
| 0000996   | .0000521 | Wealth index: Spline 3 | -.0000238 | .0000386 | -0.62 | 0.538 | -.        |
| 0000404   | .0000829 | Wealth index: Spline 4 | .0000212  | .0000314 | 0.68  | 0.499 | -.        |
|           |          | Maternal literacy      |           |          |       |       |           |
|           |          | Not literate           | 0         | (base)   |       |       |           |
| 010189    | .204081  | Semi-literate          | .107135   | .0493893 | 2.17  | 0.030 | .         |
| 0705048   | .1131922 | Literate               | .0213437  | .0467924 | 0.46  | 0.648 | -.        |
|           |          | Region                 |           |          |       |       |           |
|           |          | metropolitana          | 0         | (base)   |       |       |           |
| 0474302   | .3598027 | norte                  | .2036165  | .0795694 | 2.56  | 0.011 | .         |
| 066913    | .1818534 | nororient              | .0574702  | .0633673 | 0.91  | 0.365 | -.        |
| 1832271   | .033073  | surorient              | -.0750771 | .0550973 | -1.36 | 0.173 | -.        |
| -.0009324 |          | central                | -.1015134 | .0512412 | -1.98 | 0.048 | -.2020943 |
| -.0876873 |          | suroccidente           | -.1759579 | .0449696 | -3.91 | 0.000 | -.2642286 |
|           |          | noroccidente           | -.2467906 | .0592465 | -4.17 | 0.000 | -.3630853 |

|           |          |                       |           |          |       |       |           |
|-----------|----------|-----------------------|-----------|----------|-------|-------|-----------|
| -.130496  |          | petEn                 | .370497   | .0589341 | 6.29  | 0.000 | .         |
| 2548157   | .4861783 |                       |           |          |       |       |           |
|           |          | Rural or urban        |           |          |       |       |           |
|           |          | urban                 | 0 (base)  |          |       |       |           |
| 0032077   | .1248152 | rural                 | .0608038  | .0326108 | 1.86  | 0.063 | -.        |
|           |          | Ethnicity             |           |          |       |       |           |
|           |          | Indigenous            | -.149591  | .032084  | -4.66 | 0.000 | -.2125684 |
| -.0866136 |          |                       |           |          |       |       |           |
|           |          | Marital status        |           |          |       |       |           |
|           |          | Never in union        | 0 (base)  |          |       |       |           |
| 4805096   | .4217382 | Current partner       | -.0293857 | .229826  | -0.13 | 0.898 | -.        |
| 3656947   | .518887  | Formerly had partner  | .0765962  | .225326  | 0.34  | 0.734 | -.        |
|           |          | Diarrhea              |           |          |       |       |           |
|           |          | Diarrhea last 2 weeks | .0536243  | .0295232 | 1.82  | 0.070 | -.        |
| 0043265   | .1115752 |                       |           |          |       |       |           |
|           |          | Language              |           |          |       |       |           |
|           |          | Indigenous language   | -.1596944 | .0452356 | -3.53 | 0.000 | -.2484871 |
| -.0709018 |          |                       |           |          |       |       |           |
|           |          | _cons                 | -.9697053 | .3672133 | -2.64 | 0.008 | -1.690506 |
| -.2489047 |          |                       |           |          |       |       |           |

## Model 2A:

| Conf. Interval] | haz_stunted                           | IRR      | Linearized Std. Err. | t     | P> t  | [95%     |
|-----------------|---------------------------------------|----------|----------------------|-------|-------|----------|
|                 | Method current duration               |          |                      |       |       |          |
|                 | None or folkloric                     | 1 (base) |                      |       |       |          |
| 1.062507        | Traditional                           | .9736735 | .0433095             | -0.60 | 0.549 | .8922671 |
| 1.104909        | Modern, <15 months                    | 1.020183 | .041465              | 0.49  | 0.623 | .9419539 |
| 1.048692        | Modern, 15+ months                    | .9691469 | .0389473             | -0.78 | 0.436 | .8956351 |
|                 | Prior method                          |          |                      |       |       |          |
|                 | None or folkloric                     | 1 (base) |                      |       |       |          |
| 8096197         | Traditional                           | .8874898 | .0415205             | -2.55 | 0.011 | .        |
| 1.006342        | Modern                                | .9446191 | .0304602             | -1.77 | 0.078 | .8866819 |
|                 | Place of delivery                     |          |                      |       |       |          |
|                 | respondent's home                     | 1 (base) |                      |       |       |          |
| 1.073075        | other home                            | .935322  | .0654678             | -0.96 | 0.340 | .8152527 |
| 7572593         | government hospital                   | .8092617 | .0273822             | -6.25 | 0.000 | .        |
| .8648351        | second level (health centers, mate..) | .8899902 | .0476118             | -2.18 | 0.030 | .        |

|          |                                       |                                       |          |          |          |        |          |
|----------|---------------------------------------|---------------------------------------|----------|----------|----------|--------|----------|
| 8012728  | .9885304                              |                                       |          |          |          |        |          |
| 1.969372 | first level (health post, converge..) |                                       | .9960216 | .3459124 | -0.01    | 0.991  | .5037438 |
| 7.45e-07 | .0000405                              | other public sector                   |          | 5.49e-06 | 5.59e-06 | -11.90 | 0.000    |
| 5177972  | .8039576                              | private hospital/clinic               |          | .645203  | .0723079 | -3.91  | 0.000    |
| 4.044254 |                                       | doctor's office                       |          | 1.621294 | .7549979 | 1.04   | 0.300    |
| 1732067  | .7080557                              | family protection association (apr..) |          | .3501999 | .125604  | -2.93  | 0.004    |
| 533038   | .8103301                              | social security (igss)                |          | .6572189 | .0701198 | -3.93  | 0.000    |
| 1.290239 |                                       | other                                 |          | .9140263 | .1605213 | -0.51  | 0.609    |
|          |                                       | Antenatal visits                      |          |          |          |        |          |
|          |                                       | <4 antenatal visits                   |          | 1 (base) |          |        |          |
| 8456154  | .9796094                              | 4+ antenatal visits                   |          | .9101499 | .034101  | -2.51  | 0.012    |
| 1.230275 |                                       | Missing data                          |          | 1.12977  | .0490516 | 2.81   | 0.005    |
|          |                                       | Distance problem health               |          |          |          |        |          |
|          |                                       | no problem                            |          | 1 (base) |          |        |          |
| 1.057046 |                                       | big problem                           |          | .9943968 | .0309518 | -0.18  | 0.857    |
|          |                                       | Money problem health                  |          |          |          |        |          |
|          |                                       | no problem                            |          | 1 (base) |          |        |          |
| 1.09667  |                                       | big problem                           |          | 1.02647  | .034594  | 0.78   | 0.438    |
|          |                                       | Child sex                             |          |          |          |        |          |
| 1.059685 |                                       | male                                  |          | 1.011284 | .0240865 | 0.47   | 0.638    |
|          |                                       | Child age: Spline 1                   |          | 1.145524 | .0091958 | 16.92  | 0.000    |
| 1.163718 |                                       | Child age: Spline 2                   |          | .5508882 | .0209425 | -15.68 | 0.000    |
| 5112766  | .5935689                              | Child age: Spline 3                   |          | 4.519798 | .4729857 | 14.41  | 0.000    |
| 5.550451 |                                       | Child age: Spline 4                   |          | .2596322 | .0304667 | -11.49 | 0.000    |
| 2062169  | .3268833                              | Mother age: Spline 1                  |          | 1.008775 | .0147986 | 0.60   | 0.552    |
| 1.038245 |                                       | Mother age: Spline 2                  |          | .925124  | .0992332 | -0.73  | 0.468    |
| 1.141932 |                                       | Mother age: Spline 3                  |          | 1.339683 | .4818316 | 0.81   | 0.416    |
| 2.713961 |                                       | Mother age: Spline 4                  |          | .7177368 | .2823167 | -0.84  | 0.399    |
| 1.553387 |                                       |                                       |          |          |          |        |          |
|          |                                       | Maternal education                    |          |          |          |        |          |
|          |                                       | No education                          |          | 1 (base) |          |        |          |
| 1.002571 |                                       | Incomplete primary                    |          | .9189638 | .0407664 | -1.91  | 0.057    |
| 6813486  | .8694202                              | Complete primary                      |          | .7696611 | .0477883 | -4.22  | 0.000    |
| 6243612  | .8463093                              | Incomplete secondary                  |          | .7269131 | .0563186 | -4.12  | 0.000    |
| 1.009328 |                                       | Complete secondary                    |          | .824937  | .0847815 | -1.87  | 0.061    |
| 1.050533 |                                       | Higher                                |          | .7291965 | .135635  | -1.70  | 0.090    |

|          |                        |          |          |       |       |          |
|----------|------------------------|----------|----------|-------|-------|----------|
|          | Paternal education     |          |          |       |       |          |
|          | No education           | 1        | (base)   |       |       |          |
| 1.028741 | Incomplete primary     | .967624  | .0301925 | -1.05 | 0.292 | .9101377 |
| 1.011521 | Complete primary       | .9316916 | .0390207 | -1.69 | 0.092 | .858162  |
| 761908   | Incomplete secondary   | .8535782 | .0494047 | -2.74 | 0.006 | .        |
| 5991015  | Complete secondary     | .7165442 | .0653463 | -3.65 | 0.000 | .        |
| 1.05995  | Higher                 | .7784518 | .1224135 | -1.59 | 0.112 | .571713  |
| 1.584053 | Missing                | 1.047753 | .2206321 | 0.22  | 0.825 | .6930233 |
| 1        | Wealth index: Spline 1 | .9999984 | 9.87e-07 | -1.58 | 0.115 | .9999965 |
| 1.00002  | Wealth index: Spline 2 | .9999886 | .0000161 | -0.71 | 0.478 | .9999571 |
| 1.000102 | Wealth index: Spline 3 | 1.000021 | .0000411 | 0.51  | 0.611 | .9999402 |
| 1.000065 | Wealth index: Spline 4 | .9999887 | .000039  | -0.29 | 0.772 | .9999121 |
|          | Maternal literacy      |          |          |       |       |          |
|          | Not literate           | 1        | (base)   |       |       |          |
| 1.095148 | Semi-literate          | .999049  | .0467439 | -0.02 | 0.984 | .911383  |
| 1.193006 | Literate               | 1.086007 | .0519898 | 1.72  | 0.085 | .9886051 |
|          | Region                 |          |          |       |       |          |
|          | metropolitana norte    | 1        | (base)   |       |       |          |
| 1.134722 |                        | .9152934 | .1002066 | -0.81 | 0.419 | .7382972 |
| 1.247262 | nororient              | 1.020258 | .1044201 | 0.20  | 0.845 | .8345683 |
| 1.400587 | surorient              | 1.165443 | .1091232 | 1.64  | 0.102 | .9697773 |
| 1.471403 | central                | 1.233659 | .11076   | 2.34  | 0.020 | 1.034329 |
| 1.536115 | suroccidente           | 1.292893 | .1135373 | 2.93  | 0.004 | 1.088181 |
| 1.521173 | noroccidente           | 1.26257  | .1198525 | 2.46  | 0.014 | 1.047931 |
| 6306498  | petEn                  | .7669317 | .0764422 | -2.66 | 0.008 | .        |
|          | Rural or urban         |          |          |       |       |          |
|          | urban                  | 1        | (base)   |       |       |          |
| 1.002544 | rural                  | .934225  | .0335915 | -1.89 | 0.059 | .8705616 |
|          | Ethnicity              |          |          |       |       |          |
| 1.285331 | Indigenous             | 1.18551  | .0488264 | 4.13  | 0.000 | 1.093441 |
|          | Marital status         |          |          |       |       |          |
|          | Never in union         | 1        | (base)   |       |       |          |
| 2.001238 | Current partner        | 1.296881 | .2866138 | 1.18  | 0.240 | .8404295 |
| 1.866167 | Formerly had partner   | 1.231397 | .2608077 | 0.98  | 0.326 | .8125421 |
|          | Diarrhea               |          |          |       |       |          |

|          |                                 |       |          |          |       |       |          |
|----------|---------------------------------|-------|----------|----------|-------|-------|----------|
| 1.05464  | Diarrhea last 2 weeks           |       | .9867626 | .0334428 | -0.39 | 0.694 | .9232538 |
| 1.221557 | Language<br>Indigenous language |       | 1.122292 | .0484577 | 2.67  | 0.008 | 1.031094 |
| 0329684  | .1565657                        | _cons | .0718451 | .0285113 | -6.64 | 0.000 | .        |

## SENSITIVITY ANALYSIS 3: INCLUSION OF FEEDING INDICATORS

Model 1C:

| haz                     | Coef.     | Linearized<br>Std. Err. | t     | P> t  | [95% Conf. Interval] |           |
|-------------------------|-----------|-------------------------|-------|-------|----------------------|-----------|
| Method current duration |           |                         |       |       |                      |           |
| None or folkloric       | 0         | (base)                  |       |       |                      |           |
| Traditional             | .1880863  | .0643656                | 2.92  | 0.004 | .0617335             | .3144392  |
| Modern, <15 months      | .1366338  | .048101                 | 2.84  | 0.005 | .0422091             | .2310584  |
| Modern, 15+ months      | .2434807  | .066285                 | 3.67  | 0.000 | .1133598             | .3736015  |
| Method prior            |           |                         |       |       |                      |           |
| None or folkloric       | 0         | (base)                  |       |       |                      |           |
| Traditional             | .0703693  | .0582608                | 1.21  | 0.227 | -.0439996            | .1847382  |
| Modern                  | .0885428  | .0387279                | 2.29  | 0.023 | .0125181             | .1645675  |
| Diet frequency          |           |                         |       |       |                      |           |
| 0                       | 0         | (base)                  |       |       |                      |           |
| 1                       | -.0668101 | .0472393                | -1.41 | 0.158 | -.1595432            | .0259229  |
| Diet diversity          |           |                         |       |       |                      |           |
| 0                       | 0         | (base)                  |       |       |                      |           |
| 1                       | .0779764  | .040871                 | 1.91  | 0.057 | -.0022554            | .1582082  |
| Child sex               |           |                         |       |       |                      |           |
| male                    | -.1354291 | .0353817                | -3.83 | 0.000 | -.2048851            | -.0659731 |
| Child age: Spline 1     | -.088294  | .0147444                | -5.99 | 0.000 | -.117238             | -.05935   |
| Child age: Spline 2     | .2479096  | .128152                 | 1.93  | 0.053 | -.0036591            | .4994784  |
| Child age: Spline 3     | .3304688  | 1.672652                | 0.20  | 0.843 | -2.953031            | 3.613968  |
| Child age: Spline 4     | 0         | (omitted)               |       |       |                      |           |
| Mother age: Spline 1    | .0040045  | .0172142                | 0.23  | 0.816 | -.0297877            | .0377968  |
| Mother age: Spline 2    | .0151235  | .138368                 | 0.11  | 0.913 | -.2564997            | .2867467  |
| Mother age: Spline 3    | -.1805745 | .4840328                | -0.37 | 0.709 | -1.130755            | .7696059  |
| Mother age: Spline 4    | .3379249  | .564284                 | 0.60  | 0.549 | -.7697926            | 1.445643  |
| Maternal education      |           |                         |       |       |                      |           |
| No education            | 0         | (base)                  |       |       |                      |           |
| Incomplete primary      | -.0041856 | .0786636                | -0.05 | 0.958 | -.1586062            | .1502349  |
| Complete primary        | .110394   | .0932532                | 1.18  | 0.237 | -.0726667            | .2934547  |
| Incomplete secondary    | .1384189  | .1018207                | 1.36  | 0.174 | -.0614602            | .3382979  |
| Complete secondary      | .1469192  | .1092599                | 1.34  | 0.179 | -.0675634            | .3614018  |
| Higher                  | .0710917  | .1653868                | 0.43  | 0.667 | -.2535708            | .3957542  |
| Paternal education      |           |                         |       |       |                      |           |
| No education            | 0         | (base)                  |       |       |                      |           |
| Incomplete primary      | -.0255779 | .0623578                | -0.41 | 0.682 | -.1479892            | .0968335  |
| Complete primary        | .031635   | .0685071                | 0.46  | 0.644 | -.1028478            | .1661179  |

|                        |           |          |       |       |           |           |
|------------------------|-----------|----------|-------|-------|-----------|-----------|
| Incomplete secondary   | .0639965  | .0745999 | 0.86  | 0.391 | -.0824468 | .2104399  |
| Complete secondary     | .0916259  | .0933234 | 0.98  | 0.327 | -.0915725 | .2748243  |
| Higher                 | .208465   | .1518507 | 1.37  | 0.170 | -.0896255 | .5065554  |
| Missing                | 1.435638  | .9525824 | 1.51  | 0.132 | -.4343286 | 3.305604  |
| Wealth index: Spline 1 | 4.46e-06  | 2.10e-06 | 2.12  | 0.034 | 3.28e-07  | 8.59e-06  |
| Wealth index: Spline 2 | -.0000144 | .0000266 | -0.54 | 0.590 | -.0000666 | .0000379  |
| Wealth index: Spline 3 | .0000247  | .0000625 | 0.40  | 0.692 | -.0000979 | .0001474  |
| Wealth index: Spline 4 | -7.00e-06 | .0000505 | -0.14 | 0.890 | -.0001062 | .0000922  |
| Maternal literacy      |           |          |       |       |           |           |
| Not literate           | 0         | (base)   |       |       |           |           |
| Semi-literate          | .0604922  | .0839243 | 0.72  | 0.471 | -.1042555 | .2252398  |
| Literate               | .0535773  | .08147   | 0.66  | 0.511 | -.1063524 | .213507   |
| Region                 |           |          |       |       |           |           |
| metropolitana          | 0         | (base)   |       |       |           |           |
| norte                  | .3005916  | .1128077 | 2.66  | 0.008 | .0791445  | .5220387  |
| nororient              | .1807732  | .0852208 | 2.12  | 0.034 | .0134805  | .3480659  |
| surorient              | .0498577  | .0898449 | 0.55  | 0.579 | -.1265123 | .2262277  |
| central                | -.096746  | .0821803 | -1.18 | 0.239 | -.25807   | .0645781  |
| suroccide              | -.1433444 | .0753869 | -1.90 | 0.058 | -.2913326 | .0046438  |
| noroccide              | -.2780176 | .0921514 | -3.02 | 0.003 | -.4589154 | -.0971199 |
| petEn                  | .4479386  | .1041991 | 4.30  | 0.000 | .2433905  | .6524866  |
| Rural or urban         |           |          |       |       |           |           |
| urban                  | 0         | (base)   |       |       |           |           |
| rural                  | .1446199  | .048833  | 2.96  | 0.003 | .0487583  | .2404816  |
| Ethnicity              |           |          |       |       |           |           |
| Indigenous             | -.1376972 | .0482618 | -2.85 | 0.004 | -.2324374 | -.042957  |
| Marital status         |           |          |       |       |           |           |
| Never in union         | 0         | (base)   |       |       |           |           |
| Current partner        | 1.12376   | .9571631 | 1.17  | 0.241 | -.7551986 | 3.002719  |
| Formerly had partner   | 1.256197  | .9543959 | 1.32  | 0.188 | -.6173295 | 3.129724  |
| Diarrhea               |           |          |       |       |           |           |
| Diarrhea last 2 weeks  | .0721225  | .0441852 | 1.63  | 0.103 | -.0146151 | .1588602  |
| Language               |           |          |       |       |           |           |
| Indigenous language    | -.1802509 | .0611046 | -2.95 | 0.003 | -.3002023 | -.0602996 |
| _cons                  | -1.815738 | 1.078544 | -1.68 | 0.093 | -3.932973 | .3014976  |

Model 2A:

| haz_stunted             | IRR      | Linearized<br>Std. Err. | t     | P> t  | [95% Conf. Interval] |
|-------------------------|----------|-------------------------|-------|-------|----------------------|
| Method current duration |          |                         |       |       |                      |
| None or folkloric       | 1        | (base)                  |       |       |                      |
| Traditional             | .8788432 | .0653663                | -1.74 | 0.083 | .7594538 1.017001    |
| Modern, <15 months      | .9167734 | .0522975                | -1.52 | 0.128 | .8196503 1.025405    |
| Modern, 15+ months      | .8664282 | .0690317                | -1.80 | 0.072 | .7409814 1.013113    |
| Method prior            |          |                         |       |       |                      |
| None or folkloric       | 1        | (base)                  |       |       |                      |
| Traditional             | .8646904 | .0717855                | -1.75 | 0.080 | .7346555 1.017742    |
| Modern                  | .9895231 | .0499375                | -0.21 | 0.835 | .8961926 1.092573    |
| Diet frequency          |          |                         |       |       |                      |
| 0                       | 1        | (base)                  |       |       |                      |

|                        |          |           |       |       |          |          |
|------------------------|----------|-----------|-------|-------|----------|----------|
| 1                      | 1.022899 | .0551032  | 0.42  | 0.674 | .9202519 | 1.136996 |
| Diet diversity         |          |           |       |       |          |          |
| 0                      | 1        | (base)    |       |       |          |          |
| 1                      | .9208599 | .0415069  | -1.83 | 0.068 | .8428805 | 1.006054 |
| Child sex              |          |           |       |       |          |          |
| male                   | 1.140052 | .0485236  | 3.08  | 0.002 | 1.048668 | 1.239398 |
| Child age: Spline 1    | 1.114475 | .0237148  | 5.09  | 0.000 | 1.068881 | 1.162015 |
| Child age: Spline 2    | .64956   | .1046418  | -2.68 | 0.008 | .4734541 | .8911702 |
| Child age: Spline 3    | 6.559257 | 12.08427  | 1.02  | 0.308 | .1762778 | 244.0684 |
| Child age: Spline 4    | 1        | (omitted) |       |       |          |          |
| Mother age: Spline 1   | 1.031112 | .0213616  | 1.48  | 0.140 | .9900198 | 1.073911 |
| Mother age: Spline 2   | .7373484 | .1196865  | -1.88 | 0.061 | .5361521 | 1.014046 |
| Mother age: Spline 3   | 2.929473 | 1.662338  | 1.89  | 0.059 | .9616394 | 8.924149 |
| Mother age: Spline 4   | .3191586 | .2098133  | -1.74 | 0.083 | .0878112 | 1.160014 |
| Maternal education     |          |           |       |       |          |          |
| No education           | 1        | (base)    |       |       |          |          |
| Incomplete primary     | 1.027713 | .0778599  | 0.36  | 0.718 | .8856923 | 1.192506 |
| Complete primary       | .9114823 | .0855711  | -0.99 | 0.324 | .7580721 | 1.095938 |
| Incomplete secondary   | .8045485 | .0968907  | -1.81 | 0.071 | .635158  | 1.019114 |
| Complete secondary     | .7545891 | .1204316  | -1.76 | 0.078 | .5516274 | 1.032227 |
| Higher                 | .704365  | .2037452  | -1.21 | 0.226 | .3992004 | 1.24281  |
| Paternal education     |          |           |       |       |          |          |
| No education           | 1        | (base)    |       |       |          |          |
| Incomplete primary     | .9667114 | .0574509  | -0.57 | 0.569 | .8602624 | 1.086332 |
| Complete primary       | .9411576 | .0661749  | -0.86 | 0.389 | .8198195 | 1.080454 |
| Incomplete secondary   | .880693  | .0719756  | -1.55 | 0.120 | .7501527 | 1.03395  |
| Complete secondary     | .8743804 | .1071246  | -1.10 | 0.274 | .6874663 | 1.112114 |
| Higher                 | .8291396 | .1980682  | -0.78 | 0.433 | .5187631 | 1.325215 |
| Missing                | .6870408 | .3758151  | -0.69 | 0.493 | .2347673 | 2.010608 |
| Wealth index: Spline 1 | .9999974 | 1.67e-06  | -1.57 | 0.117 | .9999941 | 1.000001 |
| Wealth index: Spline 2 | .9999977 | .000026   | -0.09 | 0.931 | .9999467 | 1.000049 |
| Wealth index: Spline 3 | 1.000009 | .0000666  | 0.13  | 0.896 | .999878  | 1.000139 |
| Wealth index: Spline 4 | .9999857 | .000063   | -0.23 | 0.820 | .999862  | 1.000109 |
| Maternal literacy      |          |           |       |       |          |          |
| Not literate           | 1        | (base)    |       |       |          |          |
| Semi-literate          | .9973228 | .0843055  | -0.03 | 0.975 | .844829  | 1.177342 |
| Literate               | 1.024735 | .0816006  | 0.31  | 0.759 | .8764414 | 1.19812  |
| Region                 |          |           |       |       |          |          |
| metropolitana          | 1        | (base)    |       |       |          |          |
| norte                  | .8166099 | .1263305  | -1.31 | 0.191 | .6027337 | 1.106379 |
| nororient              | .9398082 | .1331987  | -0.44 | 0.661 | .7115554 | 1.24128  |
| surorient              | 1.087546 | .1477269  | 0.62  | 0.537 | .8329952 | 1.419883 |
| central                | 1.265704 | .1567134  | 1.90  | 0.057 | .9926005 | 1.613949 |
| suroccidente           | 1.324226 | .1628081  | 2.28  | 0.023 | 1.040269 | 1.685693 |
| noroccidente           | 1.286635 | .1790628  | 1.81  | 0.071 | .9790526 | 1.690849 |
| petEn                  | .6743899 | .1205663  | -2.20 | 0.028 | .4747829 | .957915  |
| Rural or urban         |          |           |       |       |          |          |
| urban                  | 1        | (base)    |       |       |          |          |
| rural                  | .8930934 | .0487958  | -2.07 | 0.039 | .8022628 | .9942076 |
| Ethnicity              |          |           |       |       |          |          |
| Indigenous             | 1.180856 | .07445    | 2.64  | 0.009 | 1.043389 | 1.336434 |
| Marital status         |          |           |       |       |          |          |
| Never in union         | 1        | (base)    |       |       |          |          |
| Current partner        | .9039778 | .5057601  | -0.18 | 0.857 | .3014222 | 2.711067 |
| Formerly had partner   | .8441088 | .4662847  | -0.31 | 0.759 | .2854009 | 2.496557 |

|                       |          |          |          |       |       |          |          |
|-----------------------|----------|----------|----------|-------|-------|----------|----------|
| Diarrhea last 2 weeks | Diarrhea | .9602702 | .0448894 | -0.87 | 0.386 | .8760723 | 1.05256  |
| Indigenous language   | Language | 1.190726 | .0768103 | 2.71  | 0.007 | 1.0491   | 1.351472 |
| _cons                 |          | .0642134 | .0500596 | -3.52 | 0.000 | .0138995 | .296655  |

---
